# Supplementary material
Source: publisher figshare collection journal article supplement (https://acs.figshare.com/ndownloader/files/20277105)
Supplement: Supplementary file 1 [file 20277105]

# Supporting Information

## Gram-Scale Synthesis of 3-Sulfonyl Flavanones

Meng-Yang Chang,<sup>\*a,b</sup> Yu-Lin Tsai<sup>a</sup> and Yu-Lun Chang<sup>a</sup>

<sup>a</sup>*Department of Medicinal and Applied Chemistry, Kaohsiung Medical University, Kaohsiung 807, Taiwan*

<sup>b</sup>*Department of Medical Research, Kaohsiung Medical University Hospital, Kaohsiung 807, Taiwan*

\*Corresponding authors: [mychang@kmu.edu.tw](mailto:mychang@kmu.edu.tw)

## Table of Contents

|                                                                                         |           |
|-----------------------------------------------------------------------------------------|-----------|
| 1. <sup>1</sup> H NMR and <sup>13</sup> C NMR spectra copies of <b>4a-4ao</b>           | S-2~S-83  |
| 2. X-ray crystal data of <b>4a</b> , <b>4e</b> , <b>4ab</b> , <b>4af</b> and <b>4aj</b> | S-84~S-93 |

# Compound 4a (<sup>1</sup>H-NMR spectral data)

HAK1A1

Pulse Sequence: s2pu1

UNITYplus-400 "unity400"

Date: Nov 8 2017

Solvent: CDCl<sub>3</sub>

Ambient temperature

Total 32 repetitions

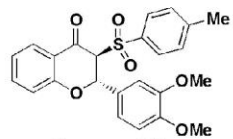

Compound 4a

<sup>1</sup>H NMR (400 MHz, CDCl<sub>3</sub>) spectra

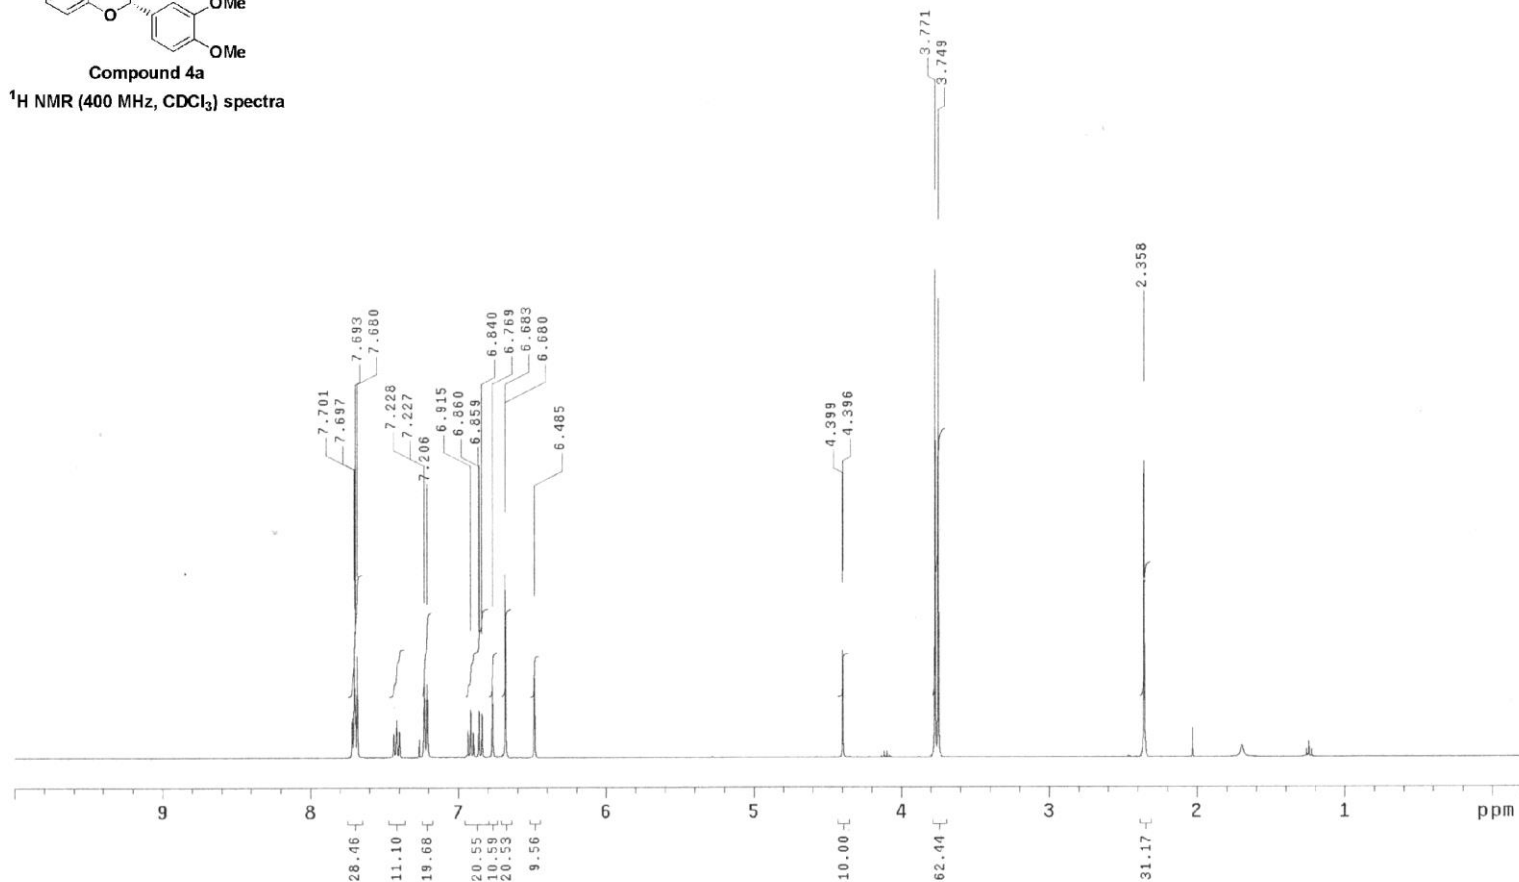

# Compound 4a (<sup>13</sup>C-NMR spectral data)

HAK1A1

Pulse Sequence: s2pu1

UNITYplus-400 "unity400"

Date: Nov 8 2017

Solvent: CDCl<sub>3</sub>

Ambient temperature

Total 480 repetitions

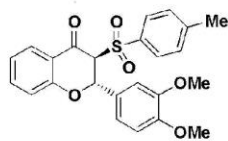

Compound 4a

<sup>13</sup>C NMR (100 MHz, CDCl<sub>3</sub>) spectra

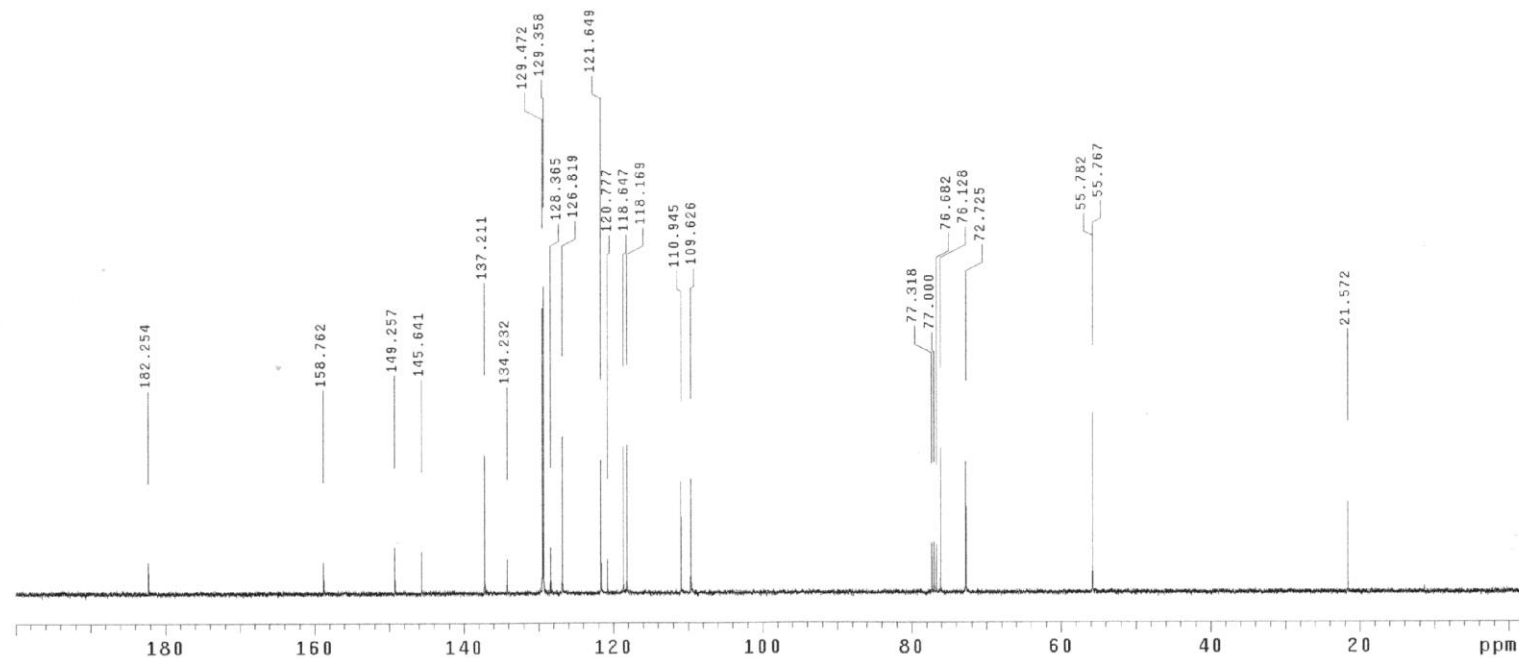

# Compound 4b (<sup>1</sup>H-NMR spectral data)

HAK2A1

Pulse Sequence: s2pul

UNITYplus-400 "unity400"

Date: Nov 6 2017

Solvent: CDCl<sub>3</sub>

Ambient temperature

Total 32 repetitions

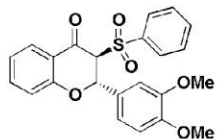

Compound 4b

<sup>1</sup>H NMR (400 MHz, CDCl<sub>3</sub>) spectra

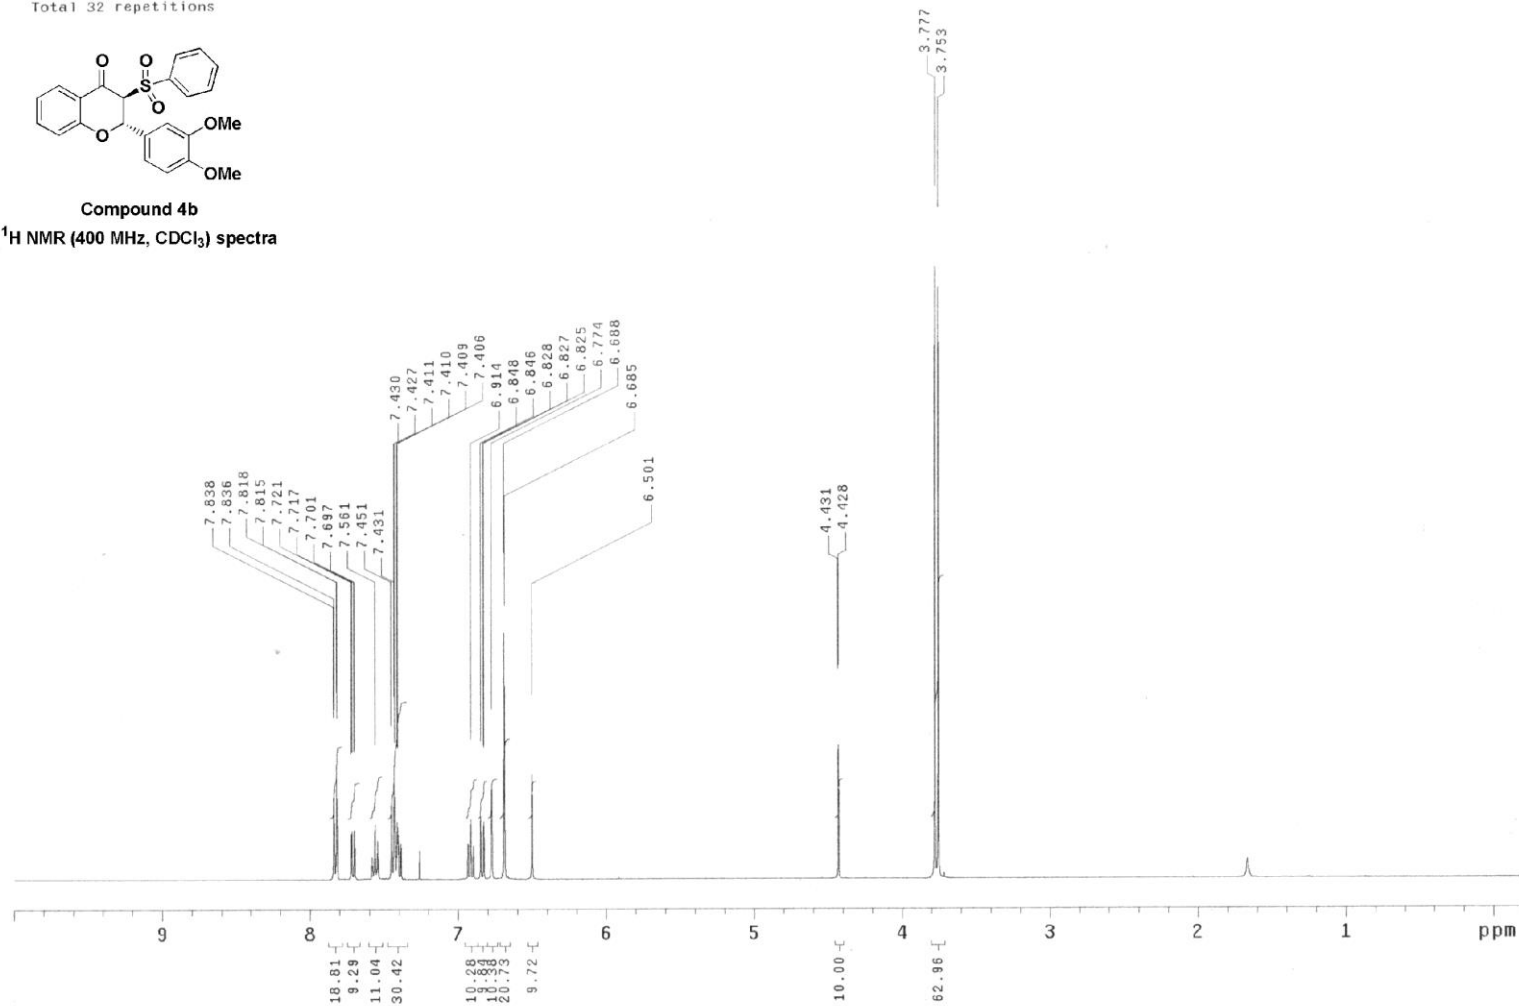

# Compound 4b ( $^{13}\text{C}$ -NMR spectral data)

HAK2A1

Pulse Sequence: s2pul

UNITYplus-400 "unity400"

Date: Nov 6 2017

Solvent:  $\text{CDCl}_3$

Ambient temperature

Total 1216 repetitions

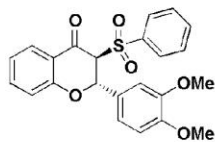

Compound 4b

$^{13}\text{C}$  NMR (100 MHz,  $\text{CDCl}_3$ ) spectra

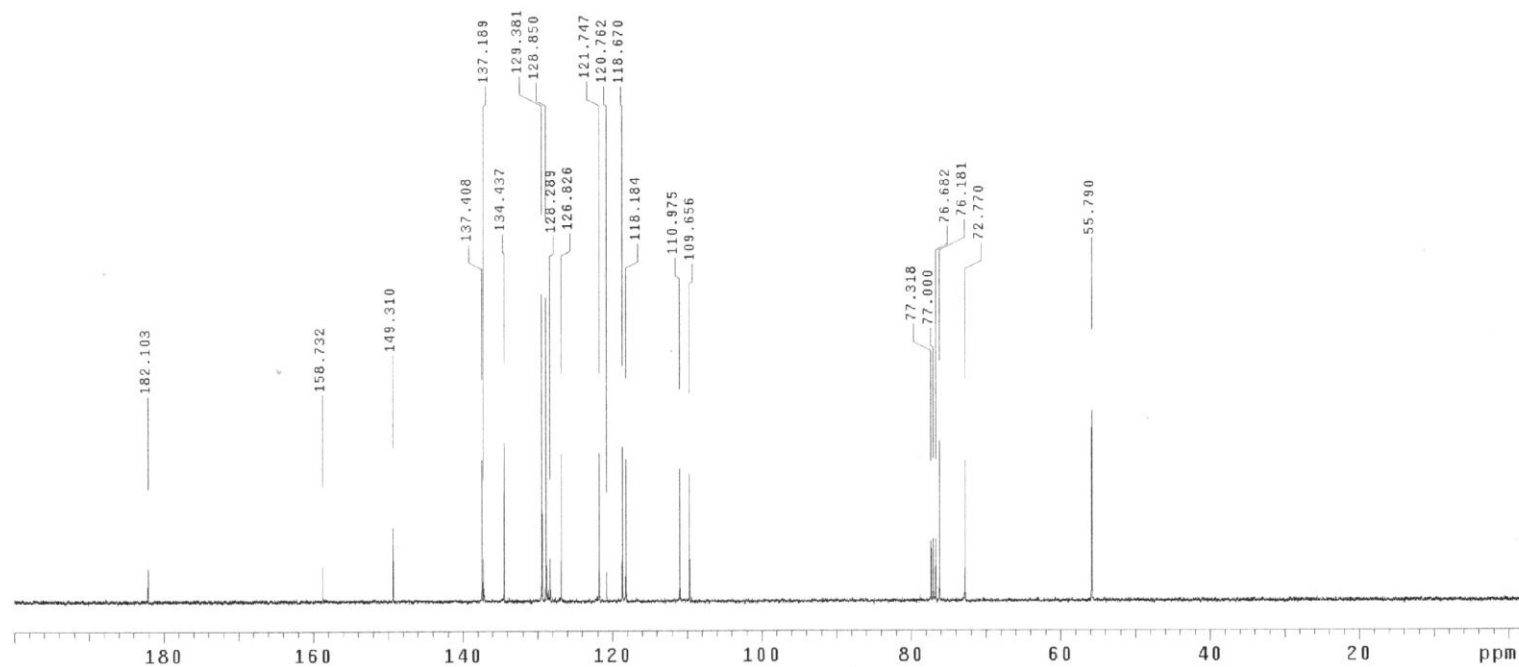

# Compound 4c (<sup>1</sup>H-NMR spectral data)

HAK3A1

Pulse Sequence: s2pu1  
UNITYplus-400 "unity400"  
Date: Nov 7 2017  
Solvent: CDCl<sub>3</sub>  
Ambient temperature  
Total 32 repetitions

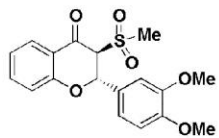

Compound 4c

<sup>1</sup>H NMR (400 MHz, CDCl<sub>3</sub>) spectra

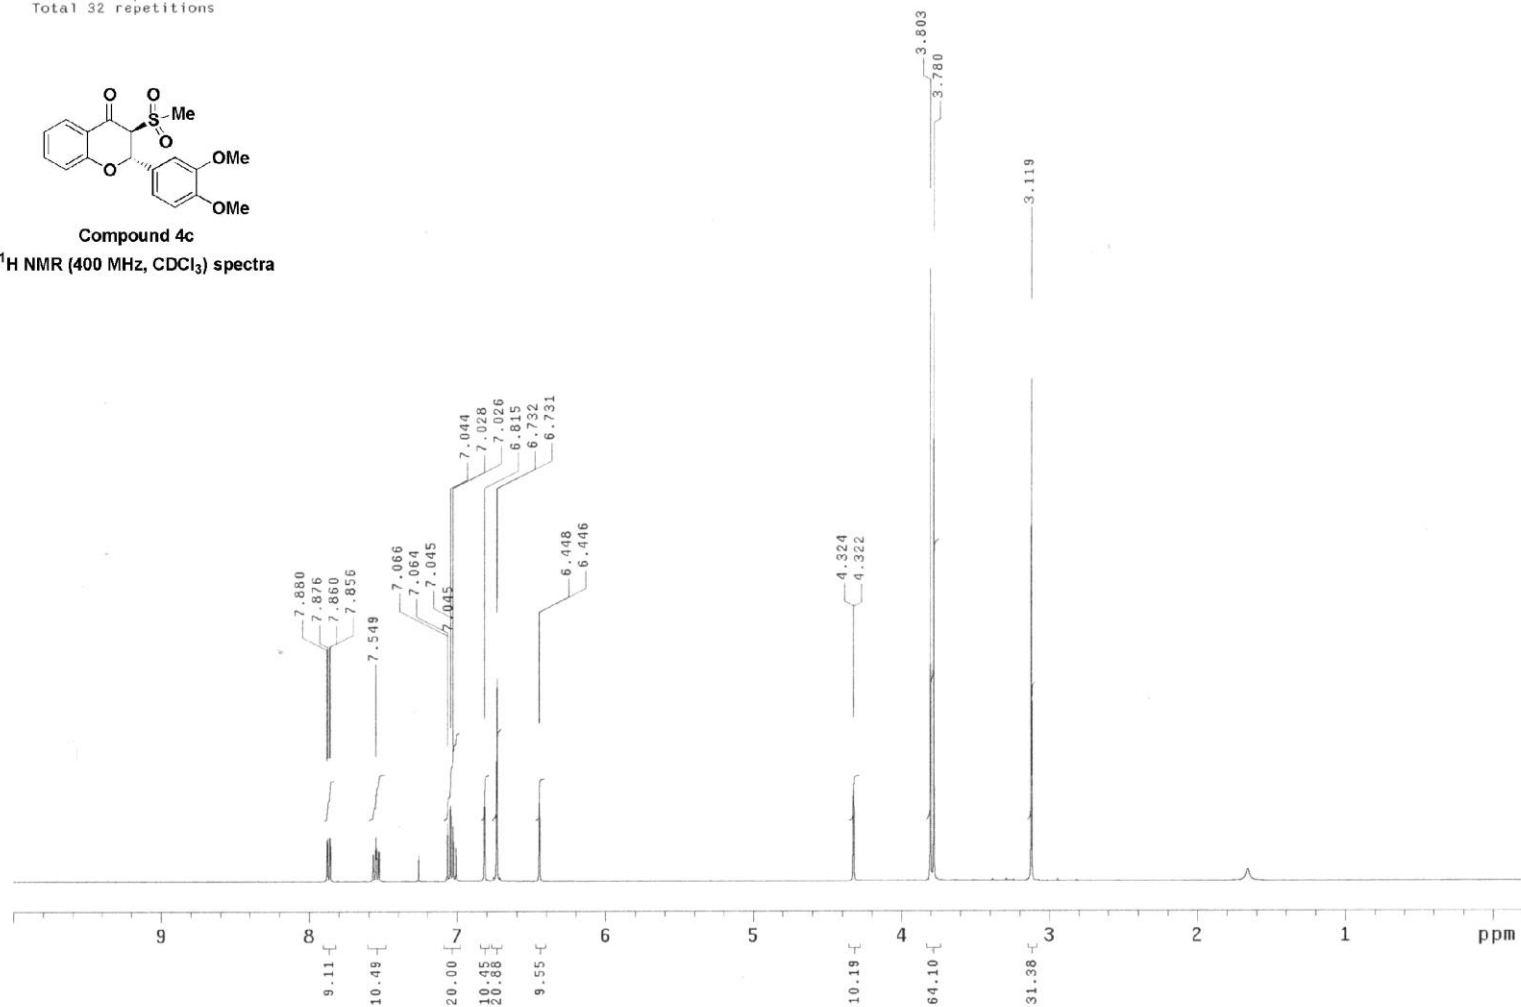

# Compound 4c (<sup>13</sup>C-NMR spectral data)

HAK3A1

Pulse Sequence: s2pu1  
UNITYplus-400 "unity400"  
Date: Nov 7 2017  
Solvent: CDCl<sub>3</sub>  
Ambient temperature  
Total 1280 repetitions

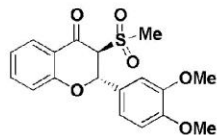

Compound 4c

<sup>13</sup>C NMR (100 MHz, CDCl<sub>3</sub>) spectra

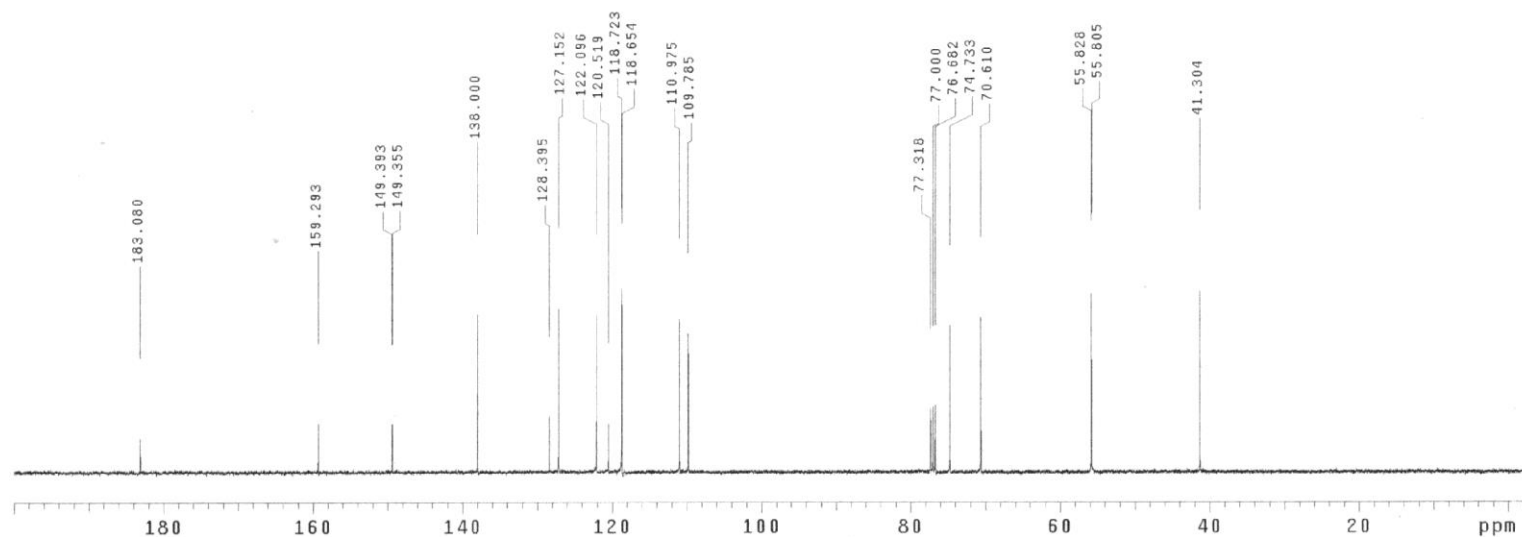

# Compound 4d (<sup>1</sup>H-NMR spectral data)

HAK4A1

Pulse Sequence: s2pu1  
 UNITYplus-400 "unity400"  
 Date: Nov 30 2017  
 Solvent: CDCl<sub>3</sub>  
 Ambient temperature  
 Total 32 repetitions

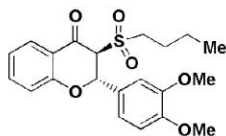

Compound 4d

<sup>1</sup>H NMR (400 MHz, CDCl<sub>3</sub>) spectra

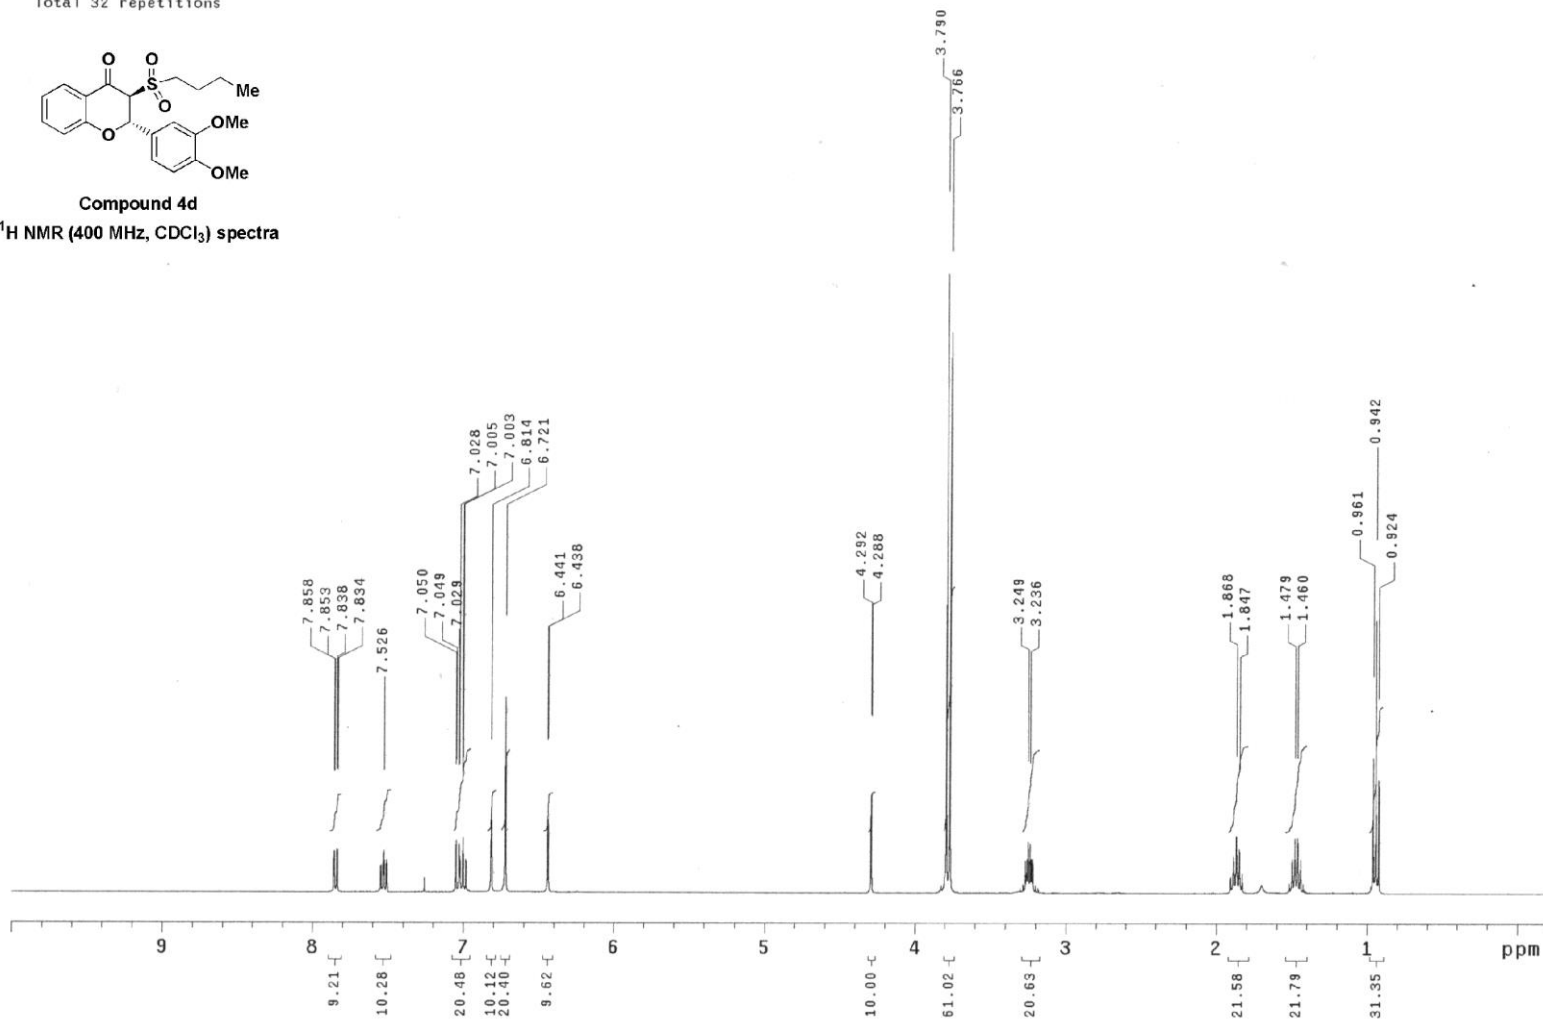



# Compound 4d (<sup>13</sup>C-NMR spectral data)

HAK4A1

Pulse Sequence: s2pul  
UNITYplus-400 "unity400"  
Date: Nov 30 2017  
Solvent: CDCl<sub>3</sub>  
Ambient temperature  
Total 320 repetitions

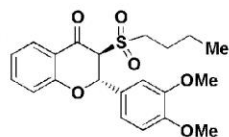

Compound 4d

<sup>13</sup>C NMR (100 MHz, CDCl<sub>3</sub>) spectra

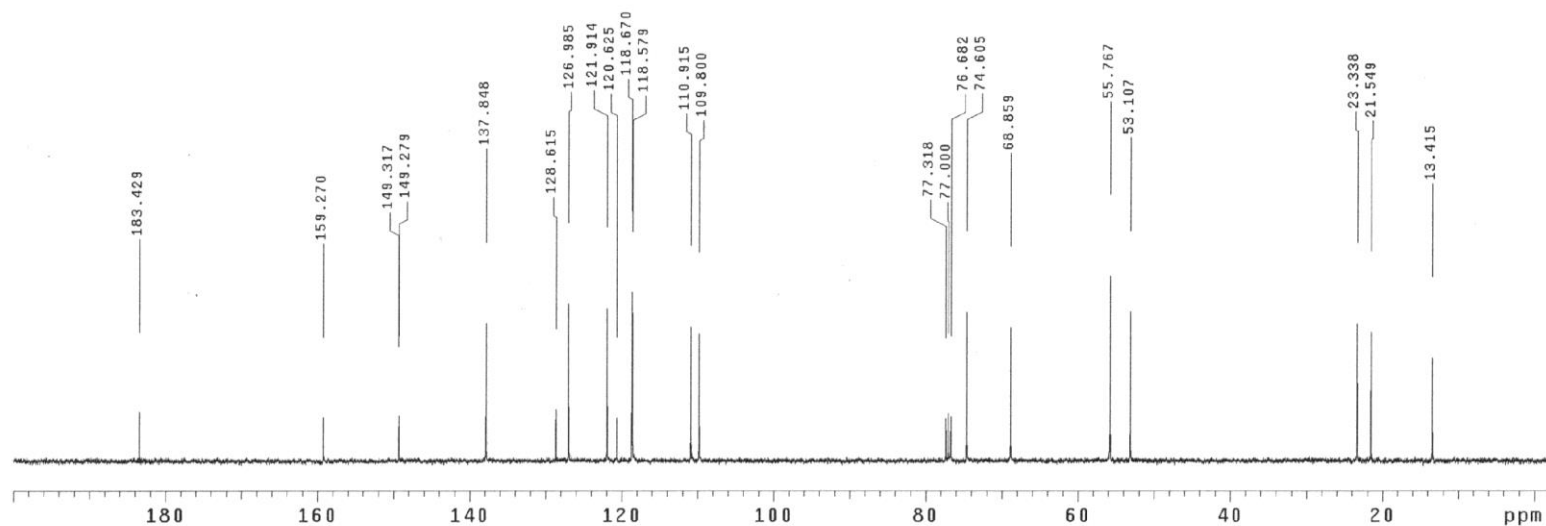

# Compound 4e (<sup>1</sup>H-NMR spectral data)

HAK5A1

Pulse Sequence: s2pu1

UNITYplus-400 "unity400"

Date: Nov 10 2017

Solvent: CDCl<sub>3</sub>

Ambient temperature

Total 32 repetitions

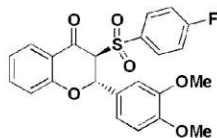

Compound 4e

<sup>1</sup>H NMR (400 MHz, CDCl<sub>3</sub>) spectra

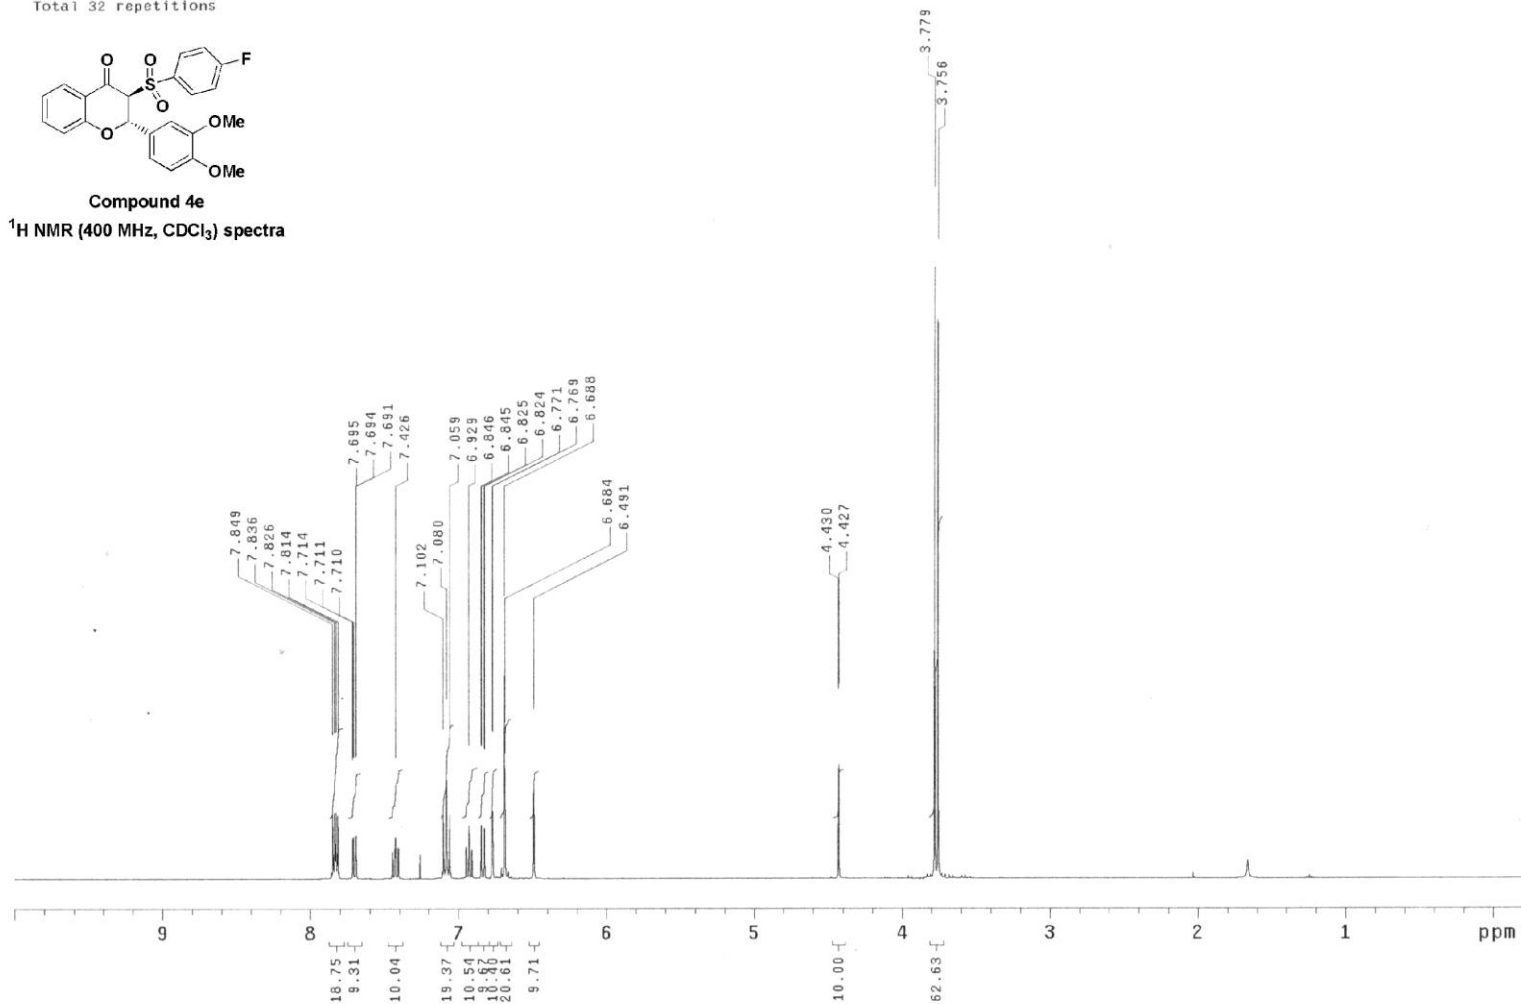

# Compound 4e (<sup>13</sup>C-NMR spectral data)

HAK5A1

Pulse Sequence: s2pu1  
UNITYplus-400 "unity400"  
Date: Nov 10 2017  
Solvent: CDCl<sub>3</sub>  
Ambient temperature  
Total 1264 repetitions

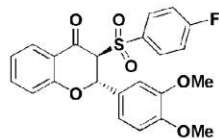

Compound 4e

<sup>13</sup>C NMR (100 MHz, CDCl<sub>3</sub>) spectra

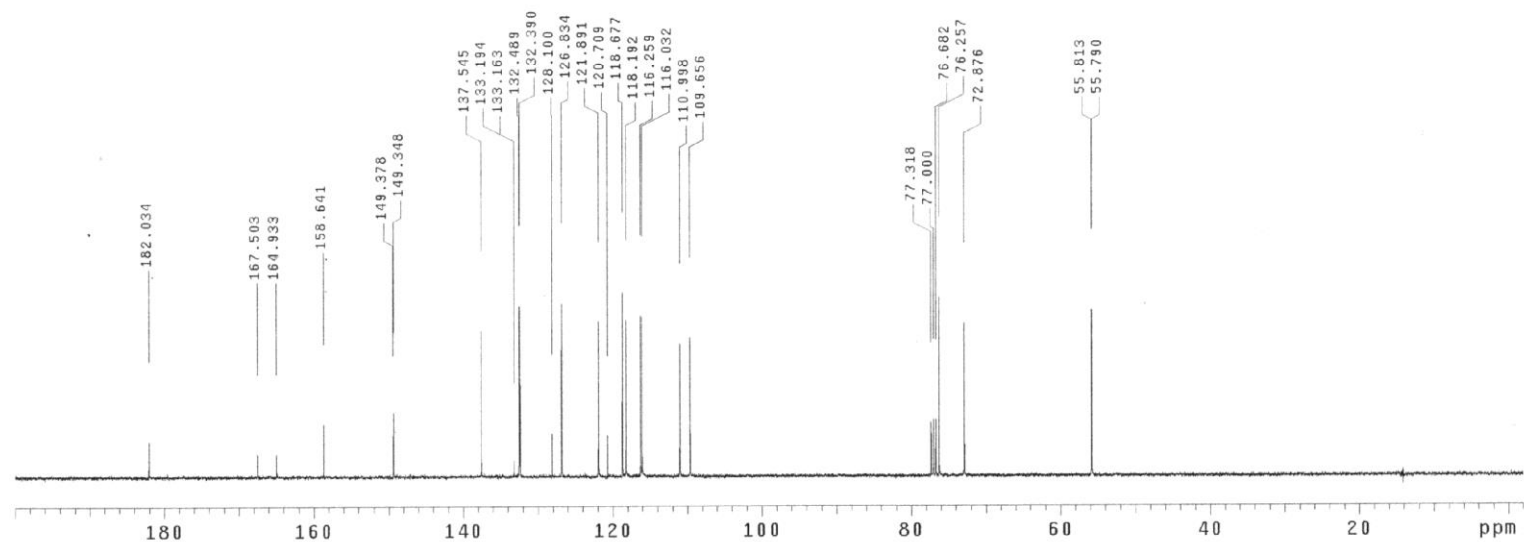

# Compound 4f (<sup>1</sup>H-NMR spectral data)

HAK6A1

Pulse Sequence: s2pu1  
 UNITYplus-400 "unity400"  
 Date: Nov 16 2017  
 Solvent: CDCl<sub>3</sub>  
 Ambient temperature  
 Total 32 repetitions

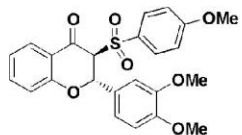

Compound 4f

<sup>1</sup>H NMR (400 MHz, CDCl<sub>3</sub>) spectra

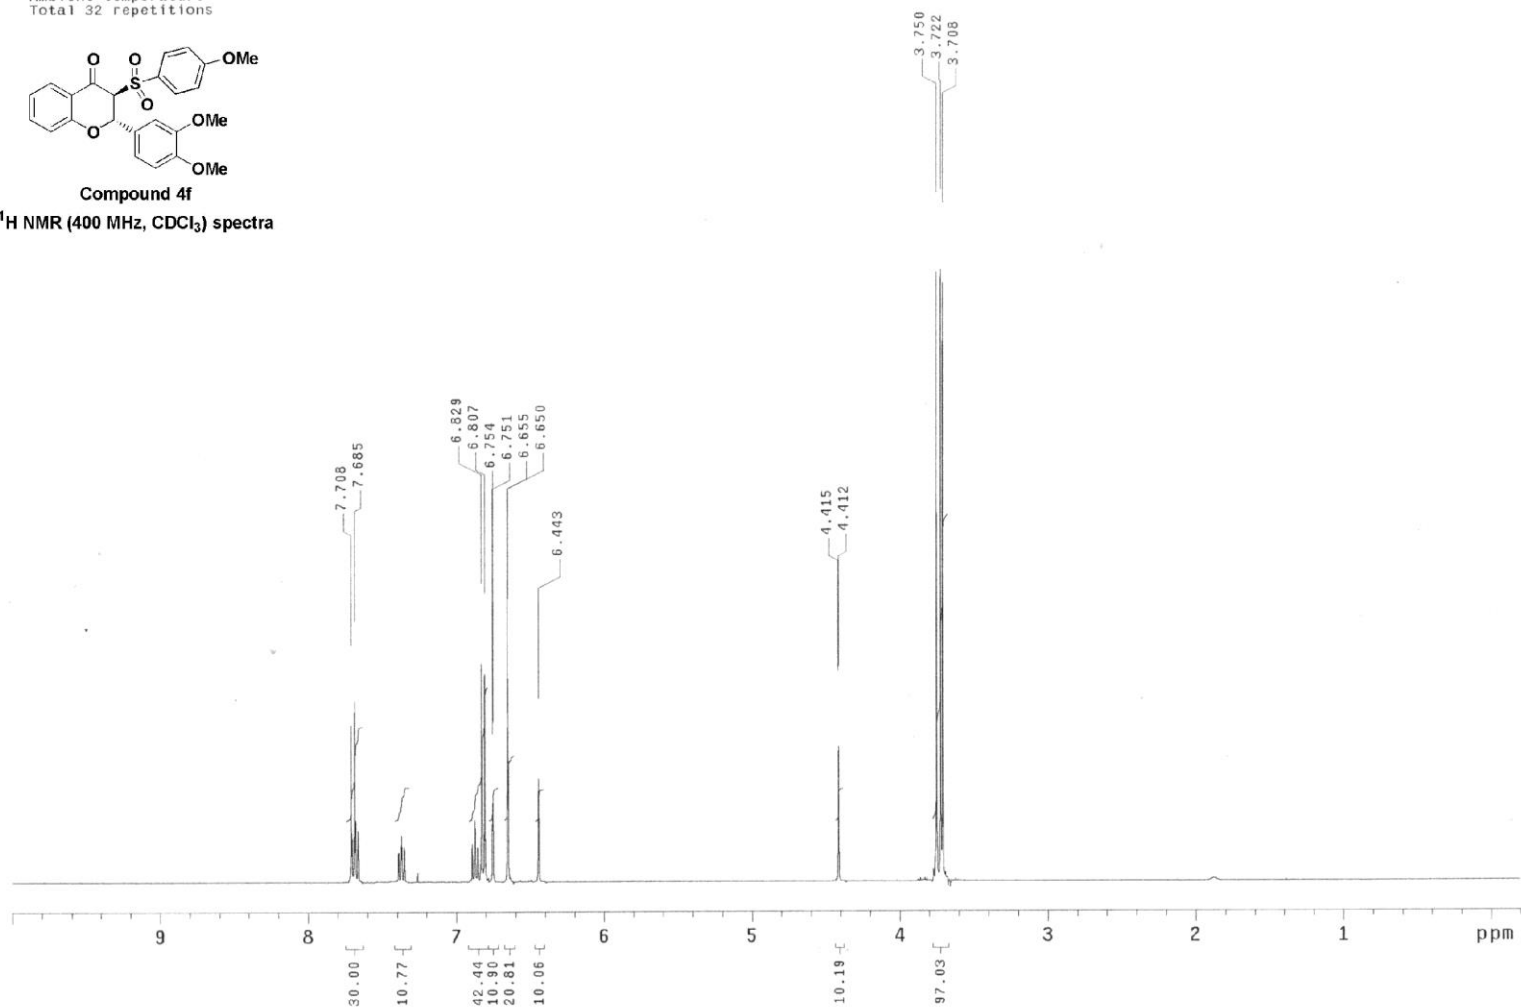

# Compound 4f (<sup>13</sup>C-NMR spectral data)

HAK6A1

Pulse Sequence: s2pu1

UNITYplus-400 "unity400"

Date: Nov 16 2017

Solvent: CDCl<sub>3</sub>

Ambient temperature

Total 256 repetitions

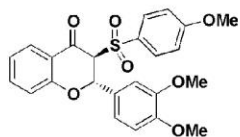

Compound 4f

<sup>13</sup>C NMR (100 MHz, CDCl<sub>3</sub>) spectra

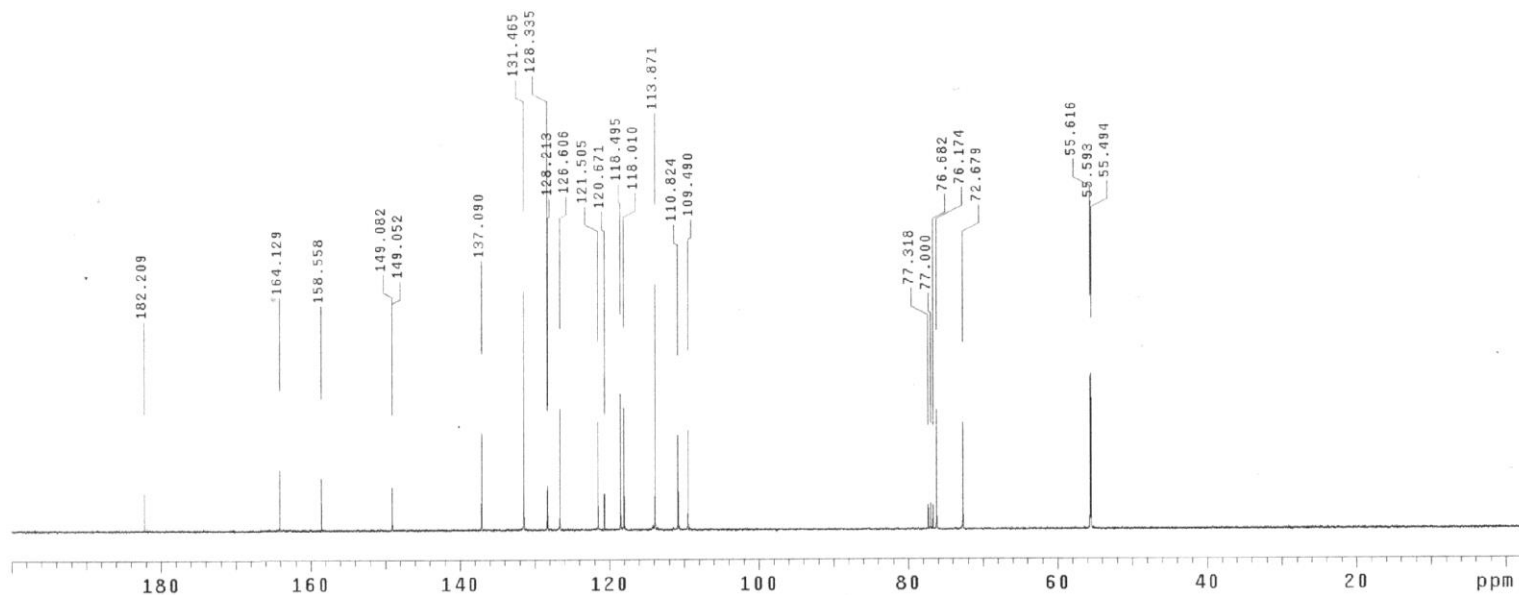

# Compound 4g (<sup>1</sup>H-NMR spectral data)

HAK7A1

Pulse Sequence: s2pu1  
 UNITYplus-400 "unity400"  
 Date: Nov 13 2017  
 Solvent: CDCl<sub>3</sub>  
 Ambient temperature  
 Total 32 repetitions

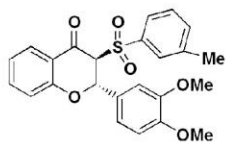

Compound 4g

<sup>1</sup>H NMR (400 MHz, CDCl<sub>3</sub>) spectra

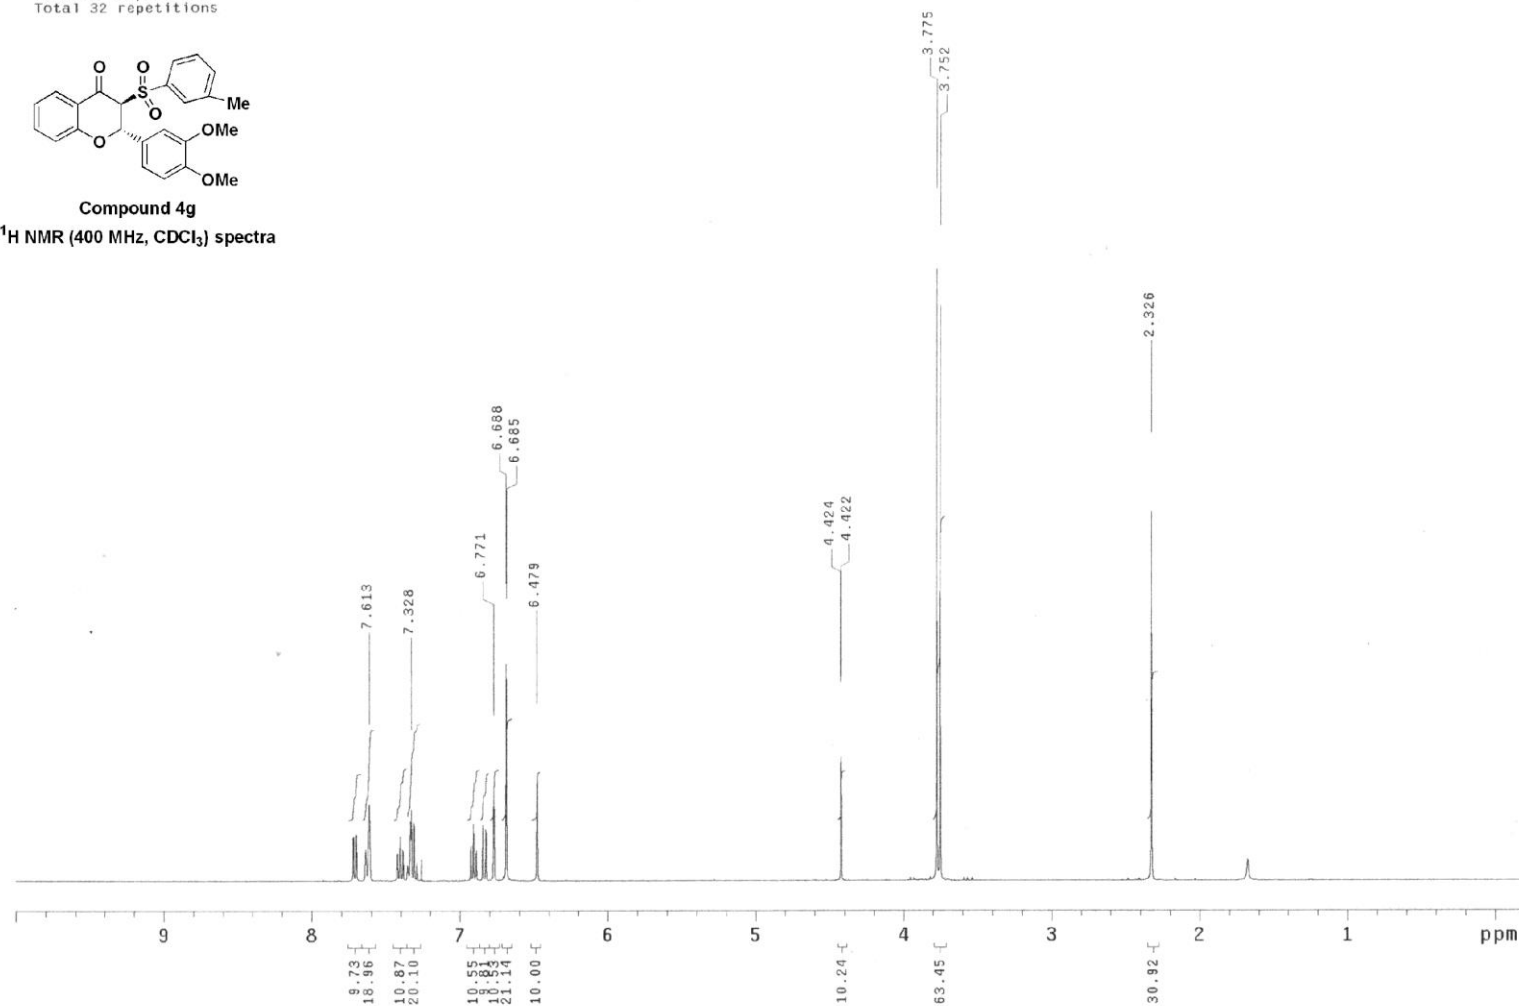

# Compound 4g ( $^{13}\text{C}$ -NMR spectral data)

HAK7A1

Pulse Sequence: s2pu1  
UNITYplus-400 "unity400"  
Date: Nov 13 2017  
Solvent:  $\text{CDCl}_3$   
Ambient temperature  
Total 1072 repetitions

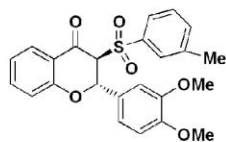

Compound 4g

$^{13}\text{C}$  NMR (100 MHz,  $\text{CDCl}_3$ ) spectra

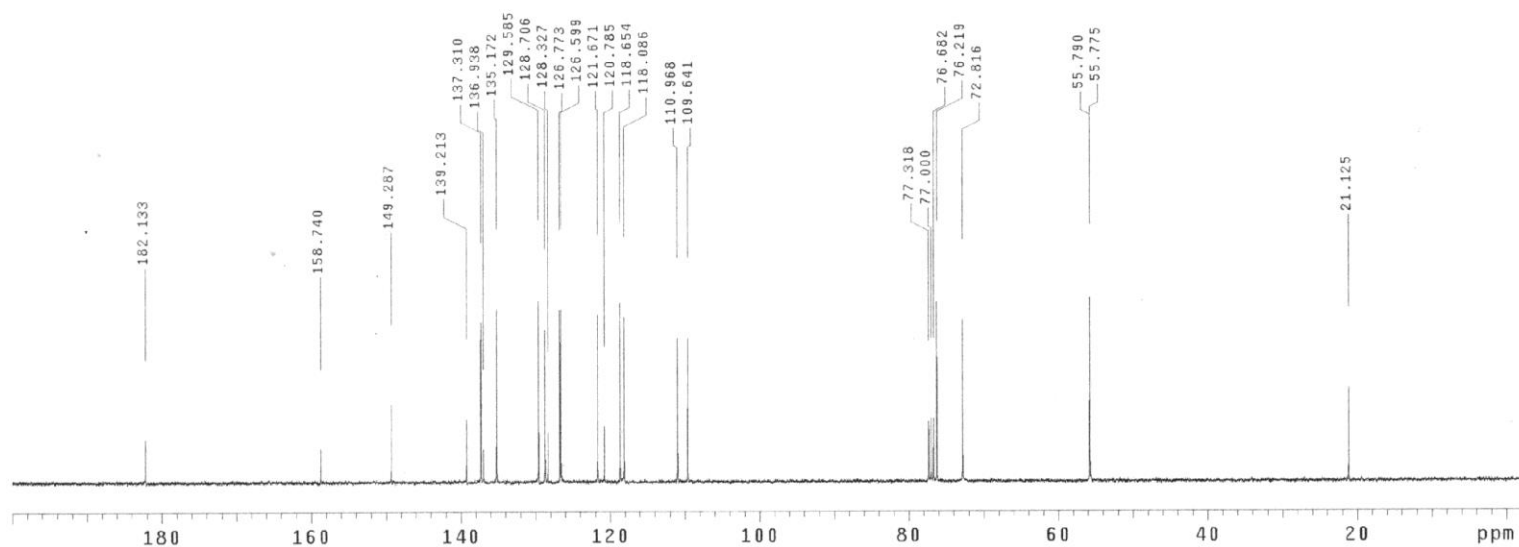

# Compound 4h (<sup>1</sup>H-NMR spectral data)

HAK8A1

Pulse Sequence: s2pu1

UNITYplus-400 "unity400"

Date: Nov 16 2017

Solvent: CDCl<sub>3</sub>

Ambient temperature

Total 32 repetitions

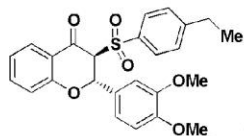

Compound 4h

<sup>1</sup>H NMR (400 MHz, CDCl<sub>3</sub>) spectra

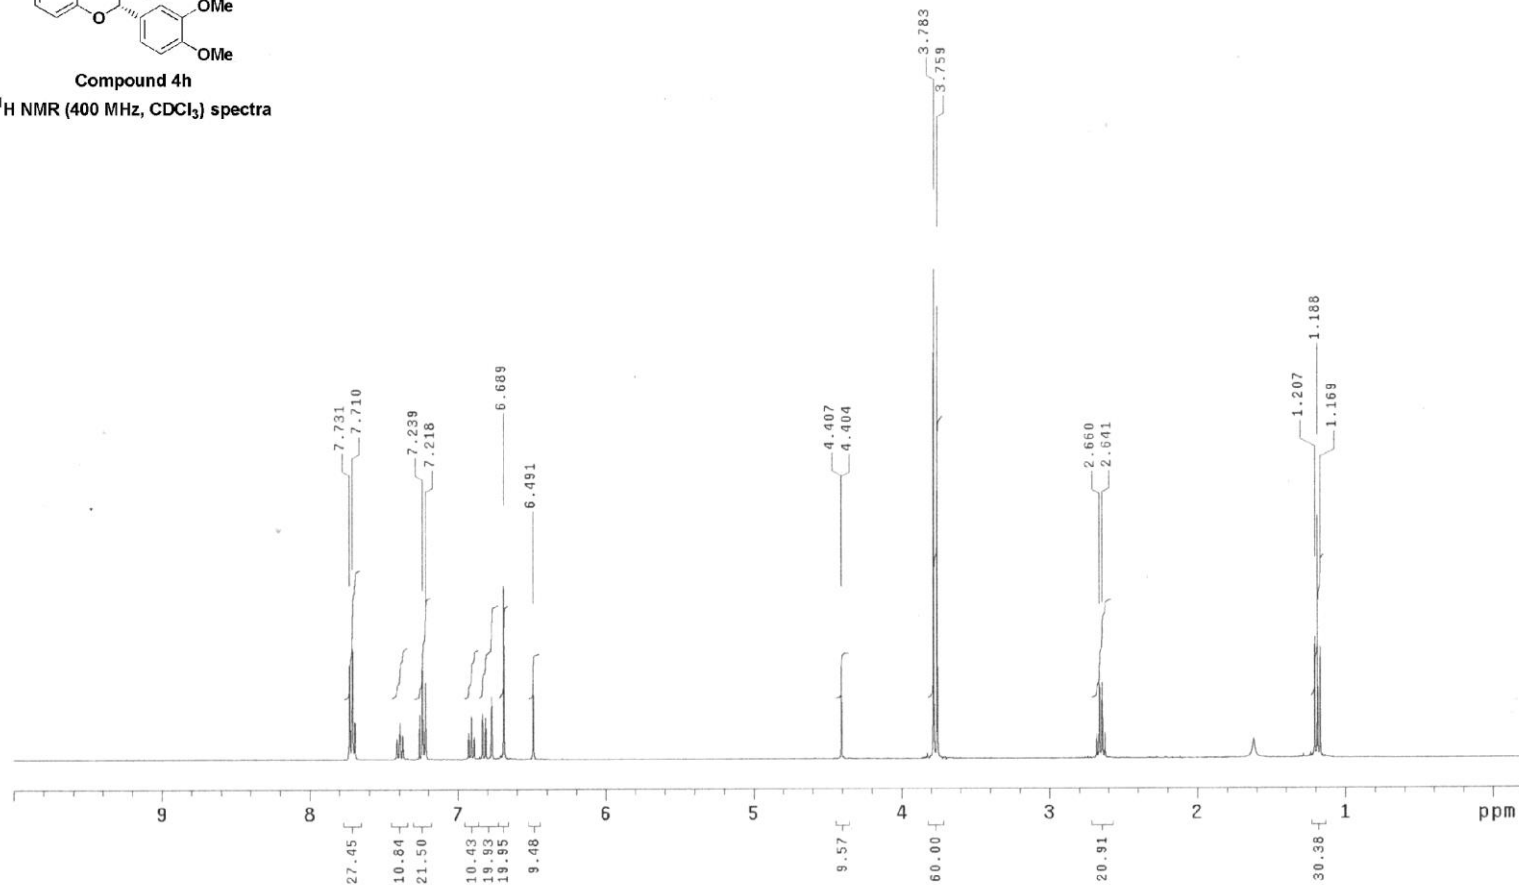



# Compound 4h (<sup>13</sup>C-NMR spectral data)

HAK8A1

Pulse Sequence: s2pu1

UNITYplus-400 "unity400"

Date: Nov 16 2017

Solvent: CDCl<sub>3</sub>

Ambient temperature

Total 1328 repetitions

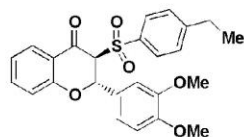

Compound 4h

<sup>13</sup>C NMR (100 MHz, CDCl<sub>3</sub>) spectra

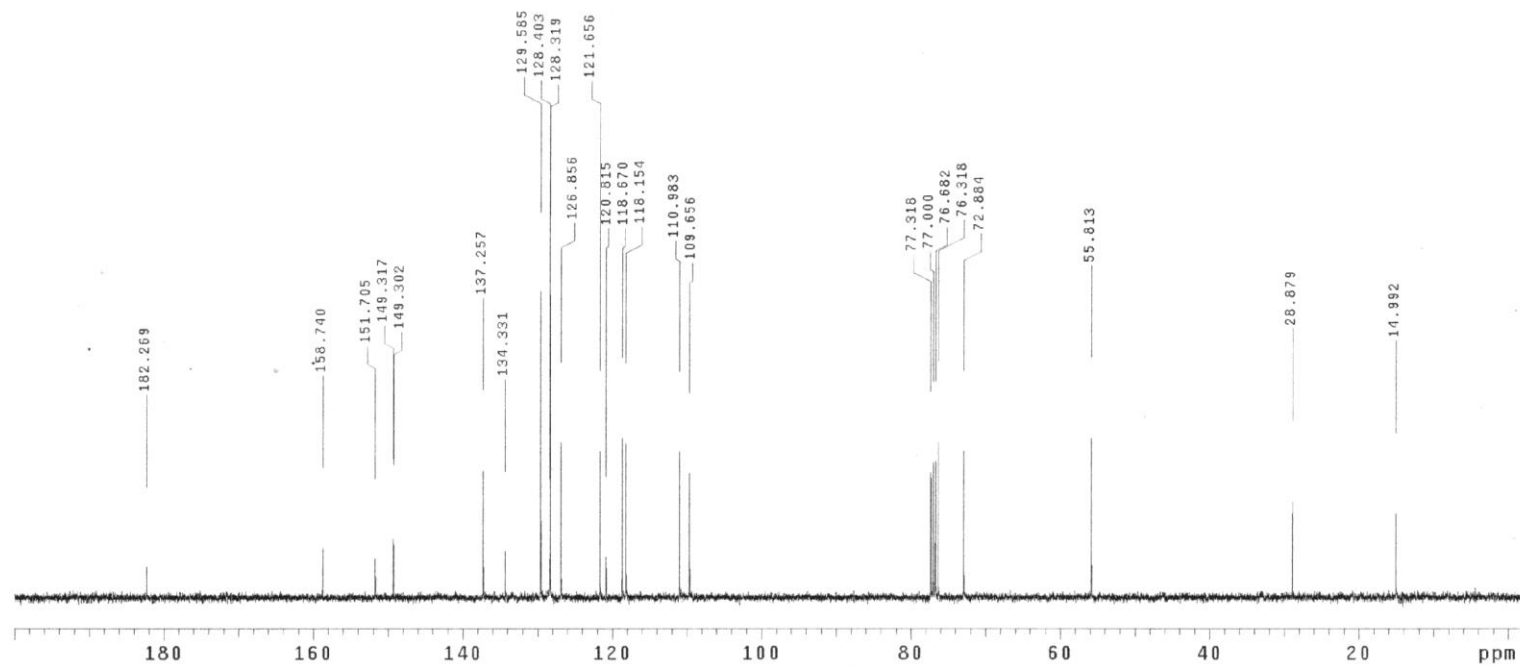

# Compound 4i (<sup>1</sup>H-NMR spectral data)

HAK9A1

Pulse Sequence: s2pu1  
 UNITYplus-400 "unity400"  
 Date: Nov 16 2017  
 Solvent: CDCl<sub>3</sub>  
 Ambient temperature  
 Total 32 repetitions

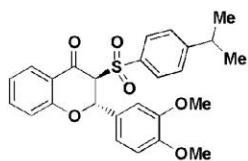

Compound 4i

<sup>1</sup>H NMR (400 MHz, CDCl<sub>3</sub>) spectra

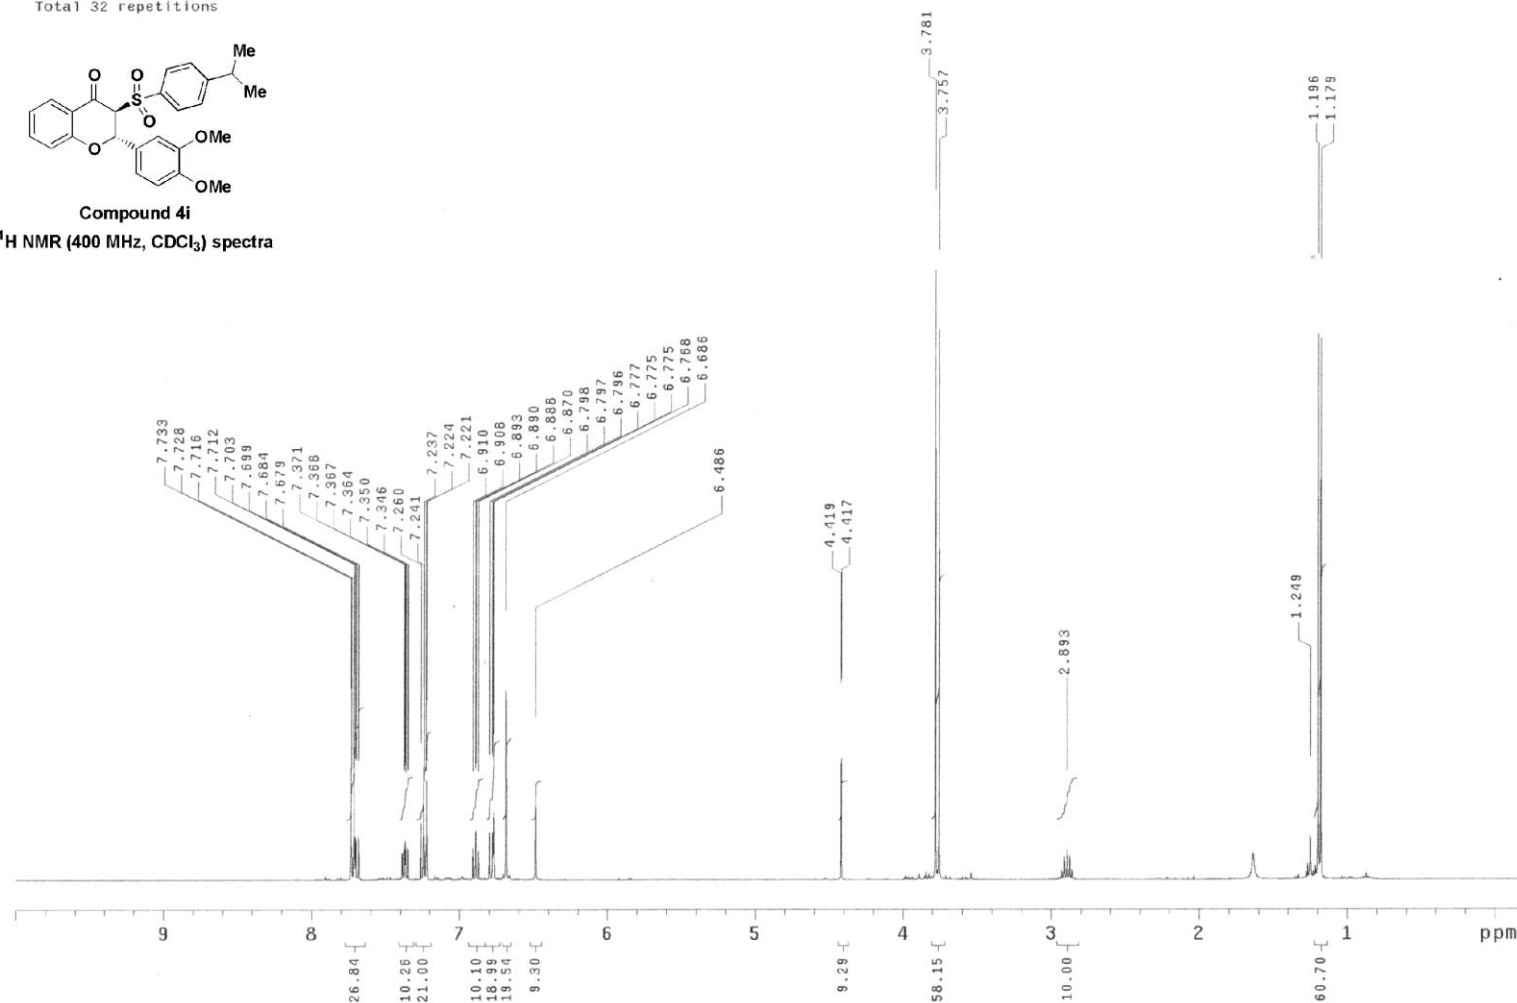

# Compound 4i (<sup>13</sup>C-NMR spectral data)

HAK9A1

Pulse Sequence: s2pu1  
UNITYplus-400 "unity400"  
Date: Nov 16 2017  
Solvent: CDCl<sub>3</sub>  
Ambient temperature  
Total 2080 repetitions

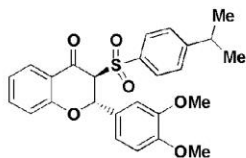

Compound 4i

<sup>13</sup>C NMR (100 MHz, CDCl<sub>3</sub>) spectra

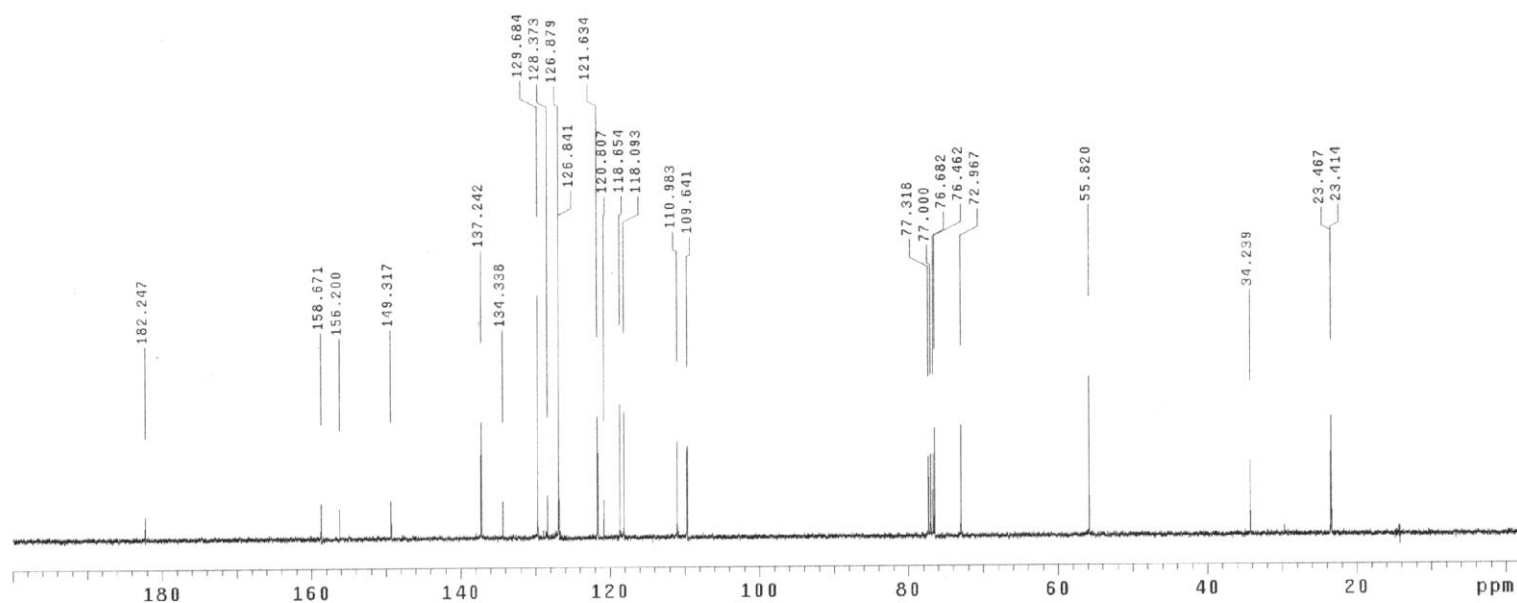

# Compound 4j (<sup>1</sup>H-NMR spectral data)

HAK10A1

Pulse Sequence: s2pul  
 UNITYplus-400 "unity400"  
 Date: Nov 23 2017  
 Solvent: CDCl<sub>3</sub>  
 Ambient temperature  
 Total 32 repetitions

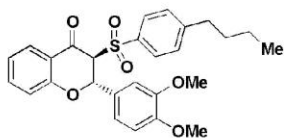

Compound 4j

<sup>1</sup>H NMR (400 MHz, CDCl<sub>3</sub>) spectra

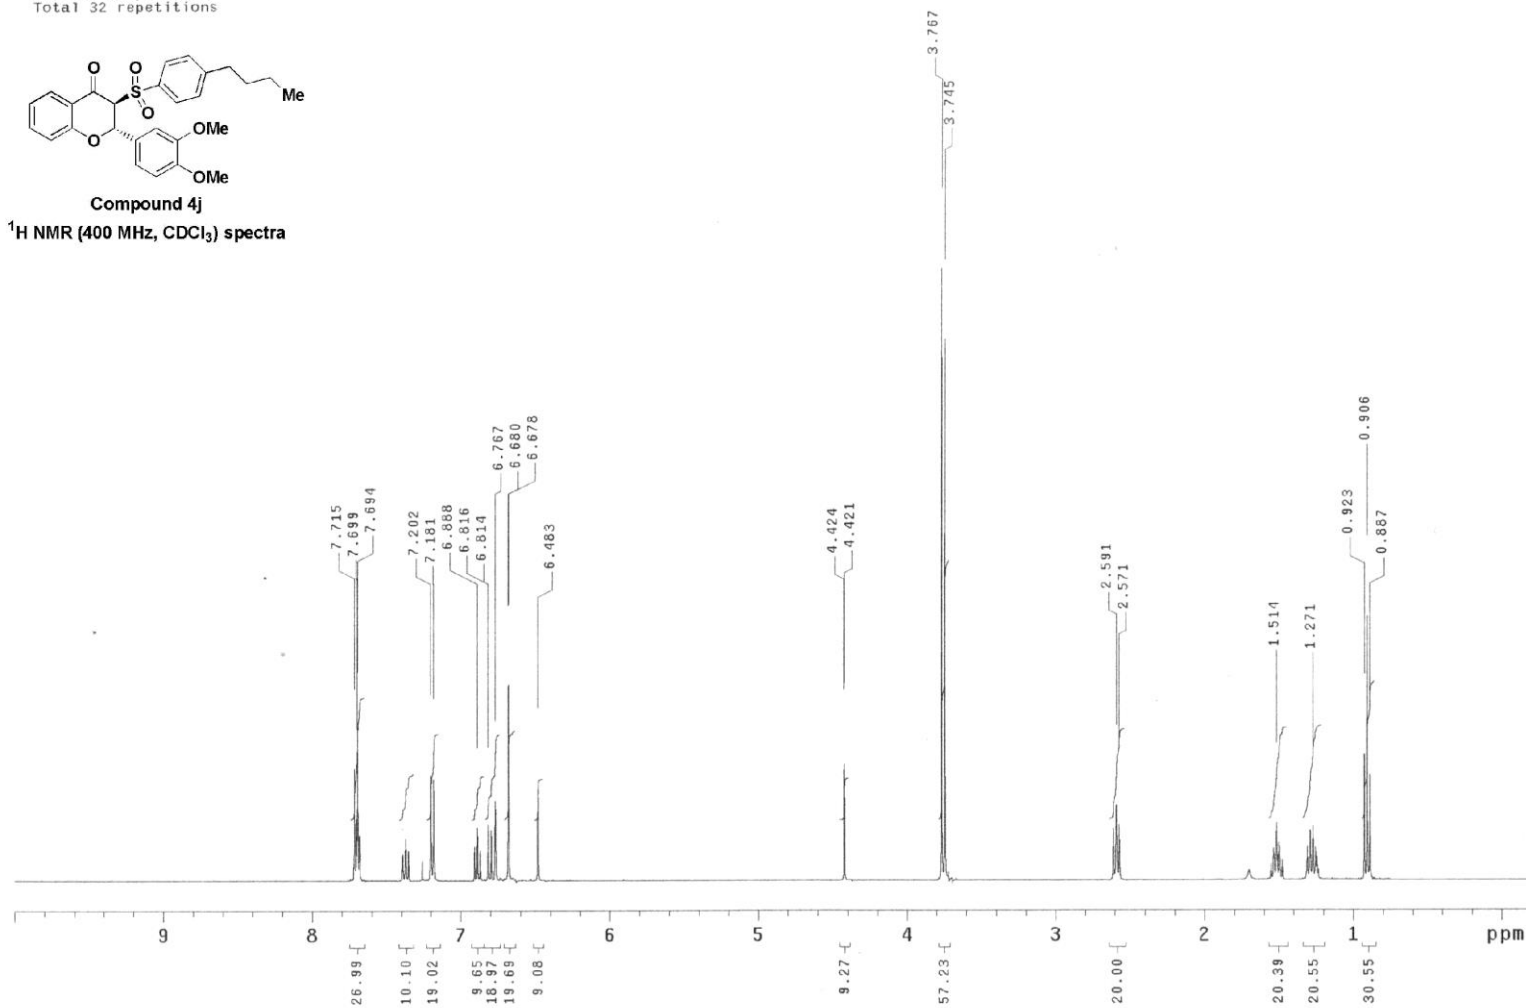

# Compound 4j (<sup>13</sup>C-NMR spectral data)

HAK10A1

Pulse Sequence: s2pul

UNITYplus-400 "unity400"

Date: Nov 23 2017

Solvent: CDCl<sub>3</sub>

Ambient temperature

Total 640 repetitions

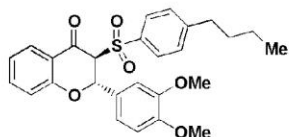

Compound 4j

<sup>13</sup>C NMR (100 MHz, CDCl<sub>3</sub>) spectra

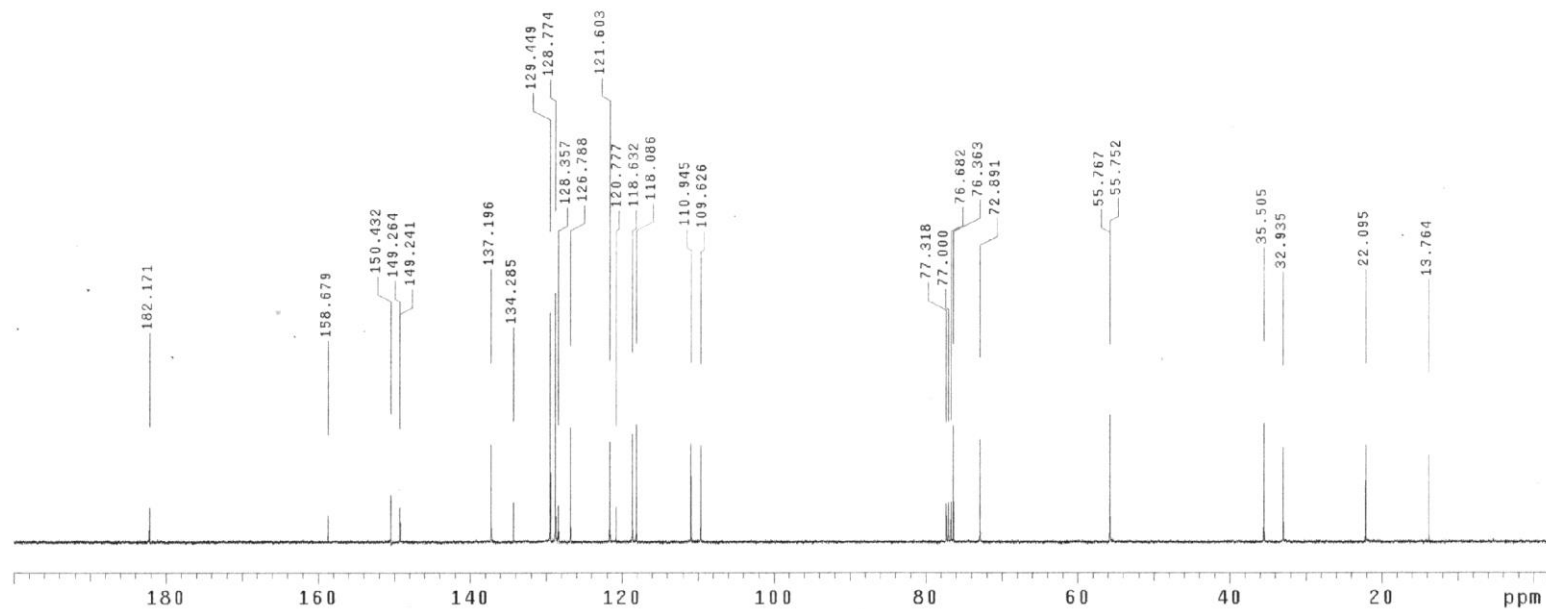

# Compound 4k (<sup>1</sup>H-NMR spectral data)

HAK11A1

Pulse Sequence: s2pu1

UNITYplus-400 "unity400"

Date: Nov 16 2017

Solvent: CDCl<sub>3</sub>

Ambient temperature

Total 32 repetitions

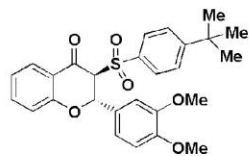

Compound 4k

<sup>1</sup>H NMR (400 MHz, CDCl<sub>3</sub>) spectra

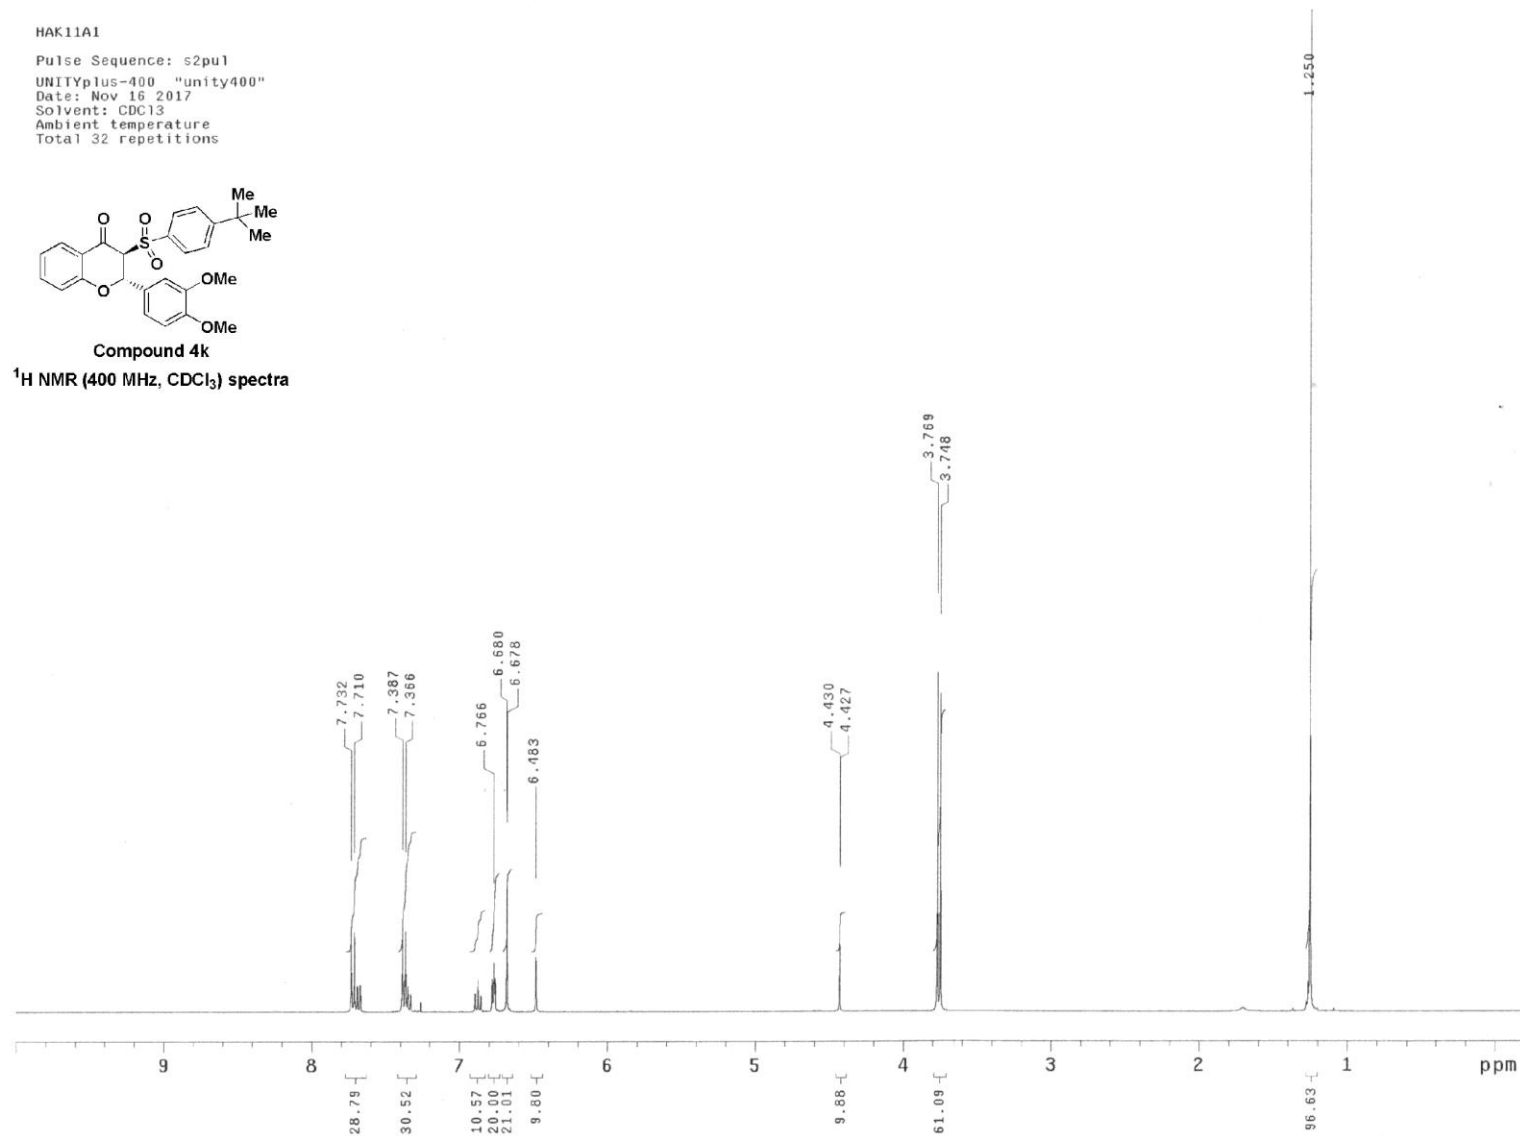

# Compound 4k (<sup>13</sup>C-NMR spectral data)

HAK11A1

Pulse Sequence: s2pu1  
 UNITYplus-400 "unity400"  
 Date: Nov 16 2017  
 Solvent: CDCl<sub>3</sub>  
 Ambient temperature  
 Total 720 repetitions

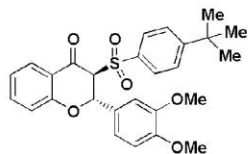

Compound 4k

<sup>13</sup>C NMR (100 MHz, CDCl<sub>3</sub>) spectra

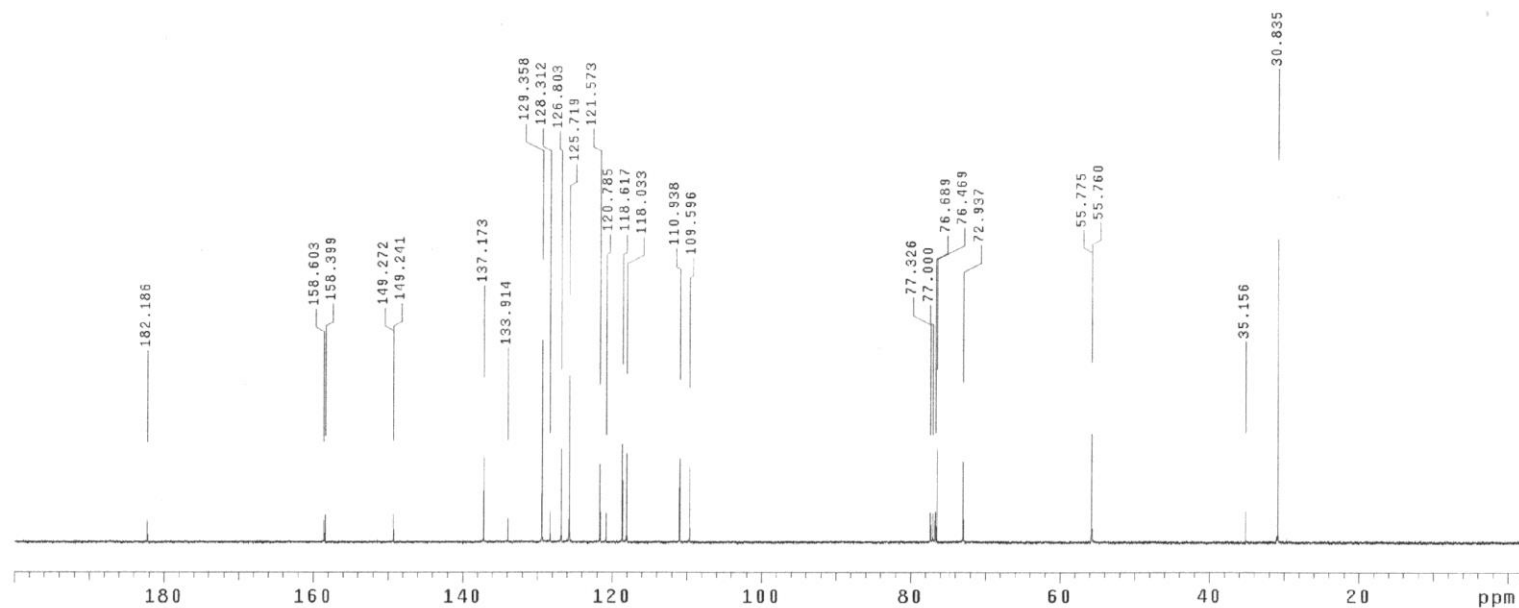

# Compound 4I (<sup>1</sup>H-NMR spectral data)

HAK12A1

Pulse Sequence: s2pu1  
 UNITYplus-400 "unity400"  
 Date: Nov 23 2017  
 Solvent: CDCl<sub>3</sub>  
 Ambient temperature  
 Total 32 repetitions

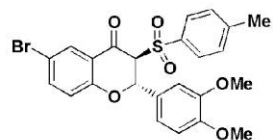

Compound 4I

<sup>1</sup>H NMR (400 MHz, CDCl<sub>3</sub>) spectra

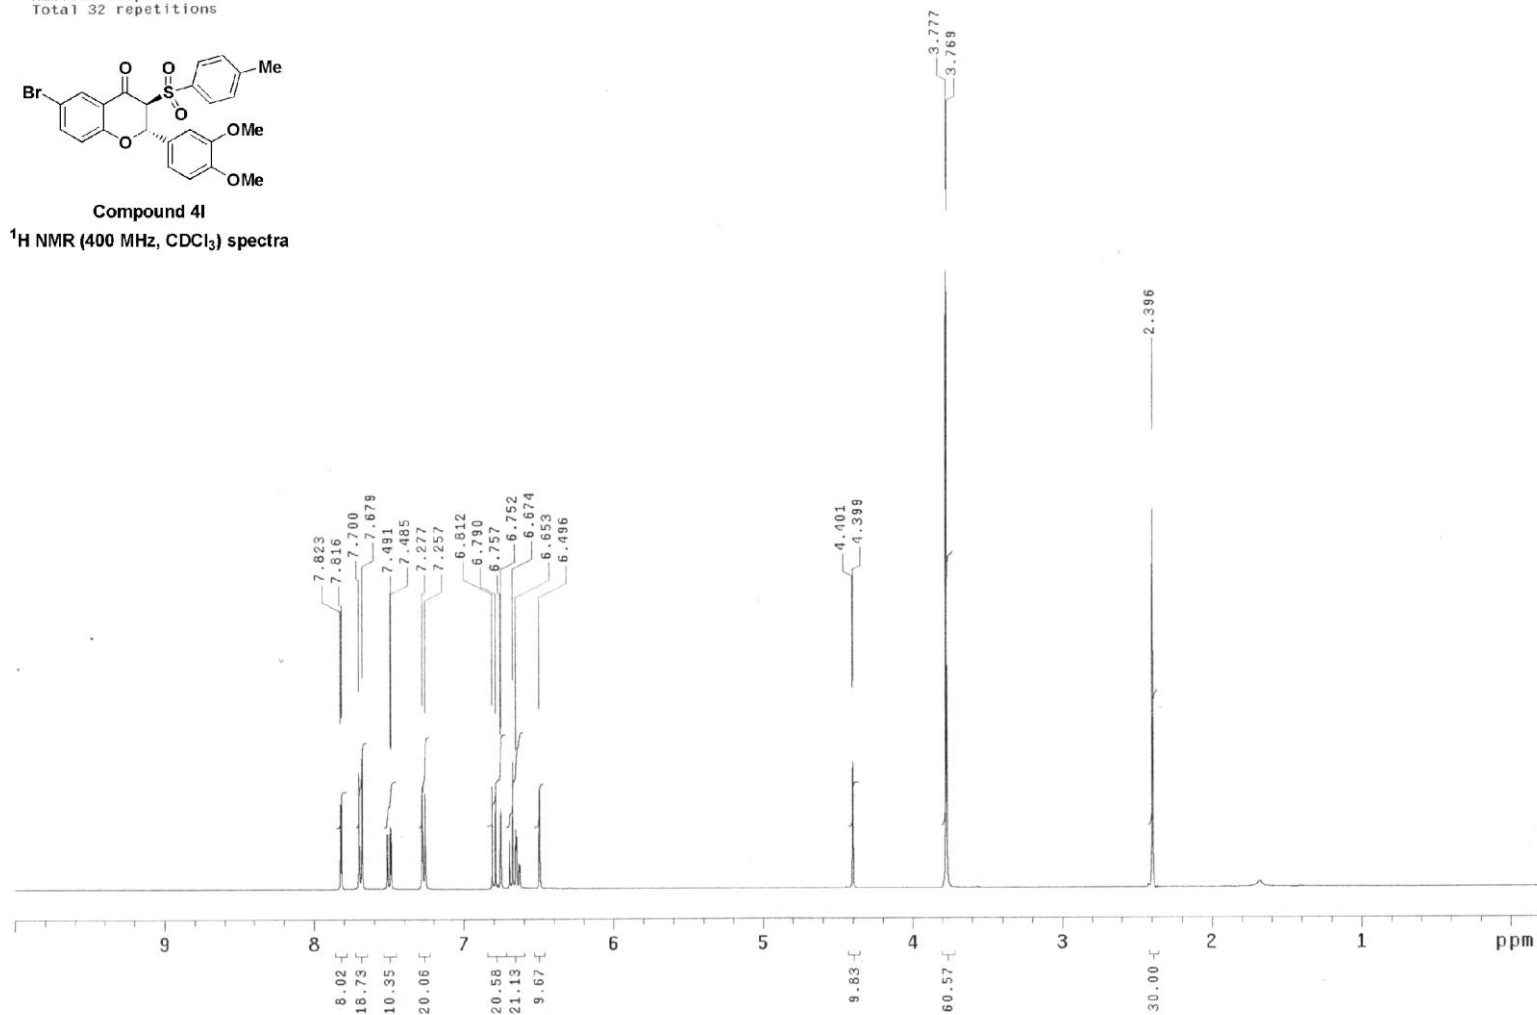



# Compound 4I (<sup>13</sup>C-NMR spectral data)

HAK12A1

Pulse Sequence: s2pu1  
 UNITYplus-400 "unity400"  
 Date: Nov 23 2017  
 Solvent: CDCl<sub>3</sub>  
 Ambient temperature  
 Total 512 repetitions

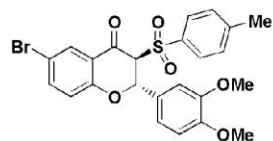

Compound 4I

<sup>13</sup>C NMR (100 MHz, CDCl<sub>3</sub>) spectra

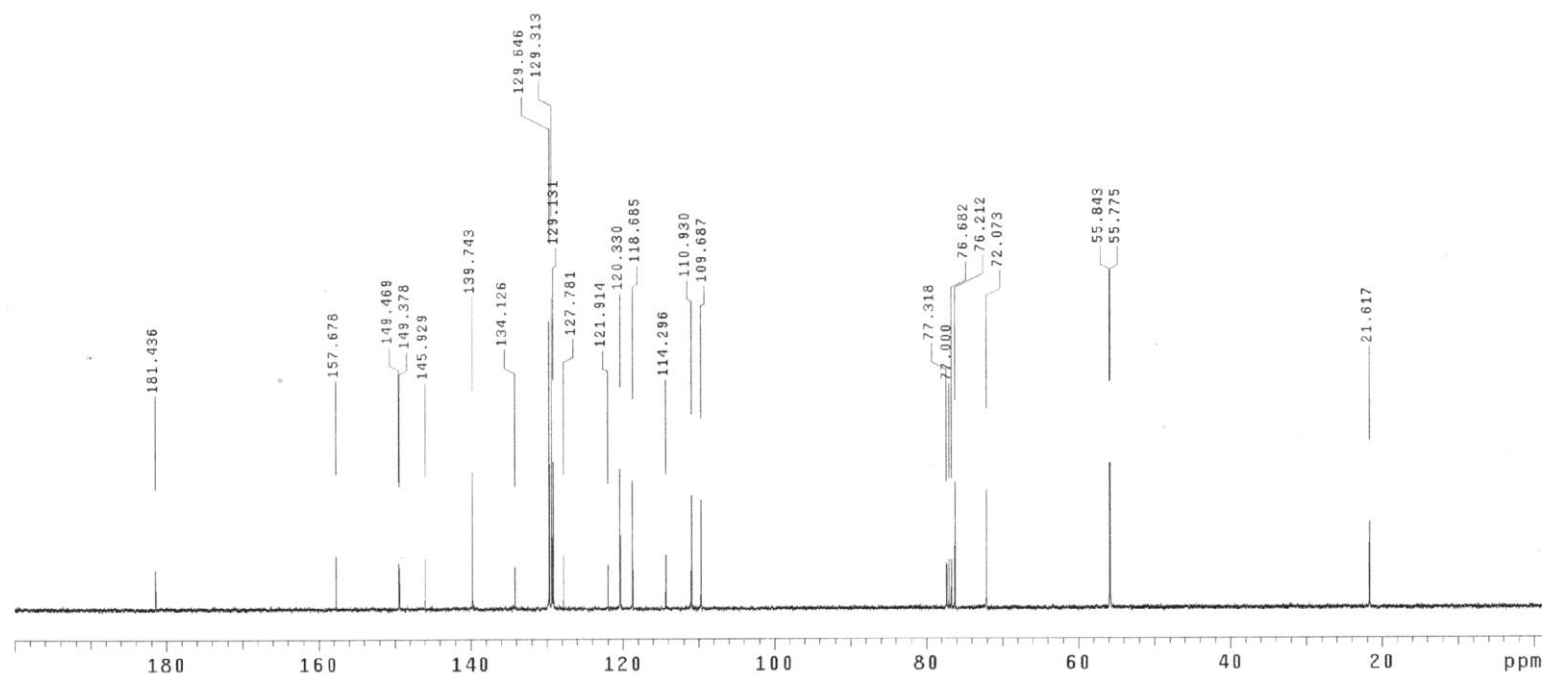

# Compound 4m (<sup>1</sup>H-NMR spectral data)

HAK13A1

Pulse Sequence: s2pu1

UNITYplus-400 "unity400"

Date: Nov 23 2017

Solvent: CDCl<sub>3</sub>

Ambient temperature

Total 32 repetitions

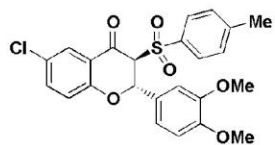

Compound 4m

<sup>1</sup>H NMR (400 MHz, CDCl<sub>3</sub>) spectra

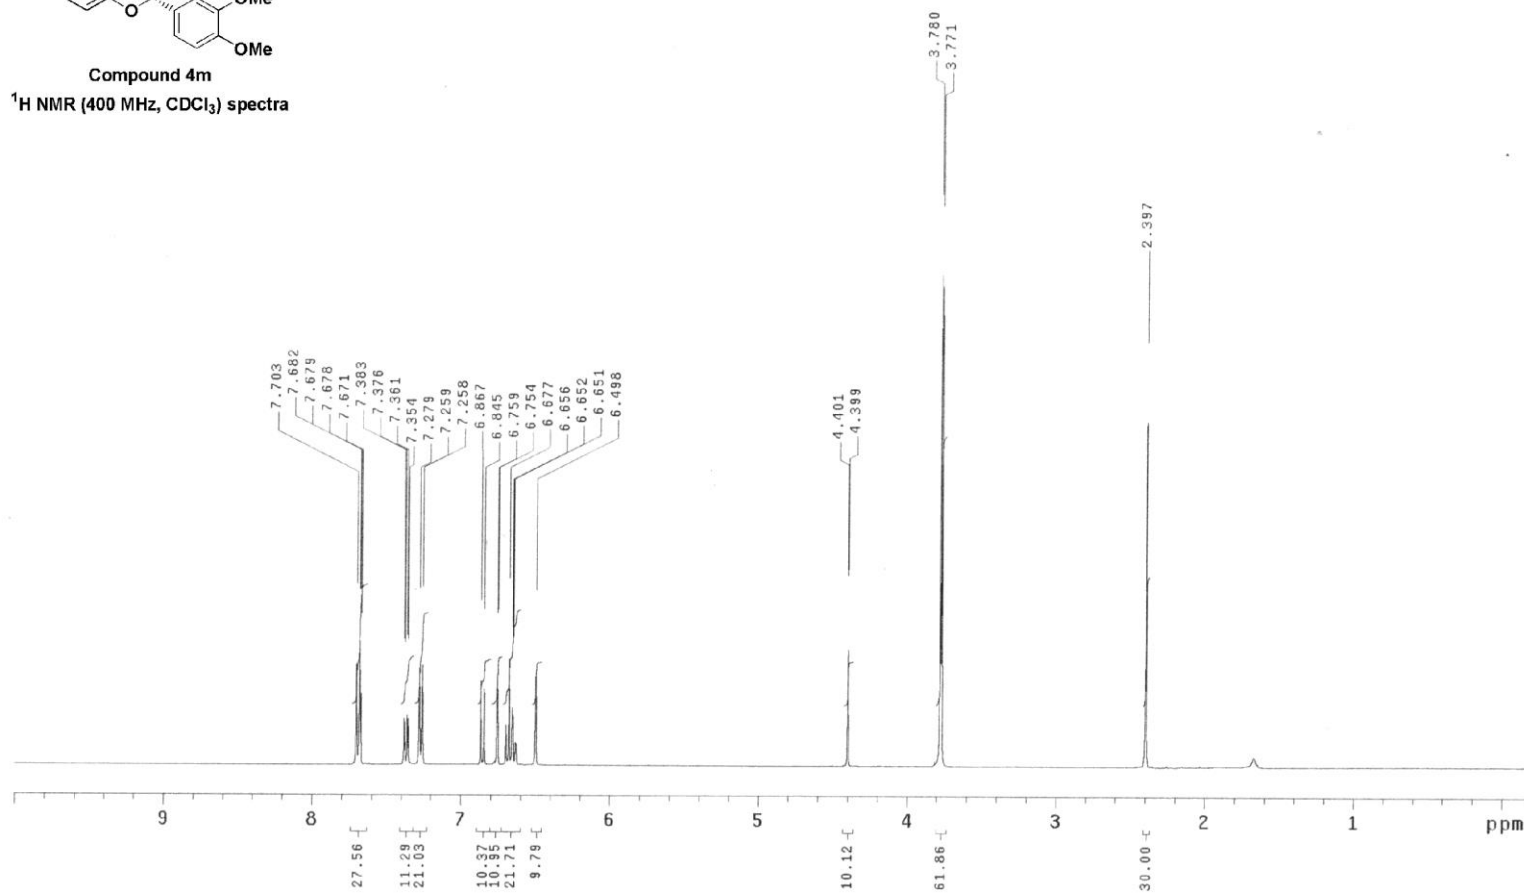

# Compound 4m (<sup>13</sup>C-NMR spectral data)

HAK13A1

Pulse Sequence: s2pu1

UNITYplus-400 "unity400"

Date: Nov 23 2017

Solvent: CDCl<sub>3</sub>

Ambient temperature

Total 464 repetitions

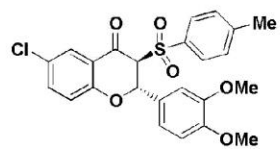

Compound 4m

<sup>13</sup>C NMR (100 MHz, CDCl<sub>3</sub>) spectra

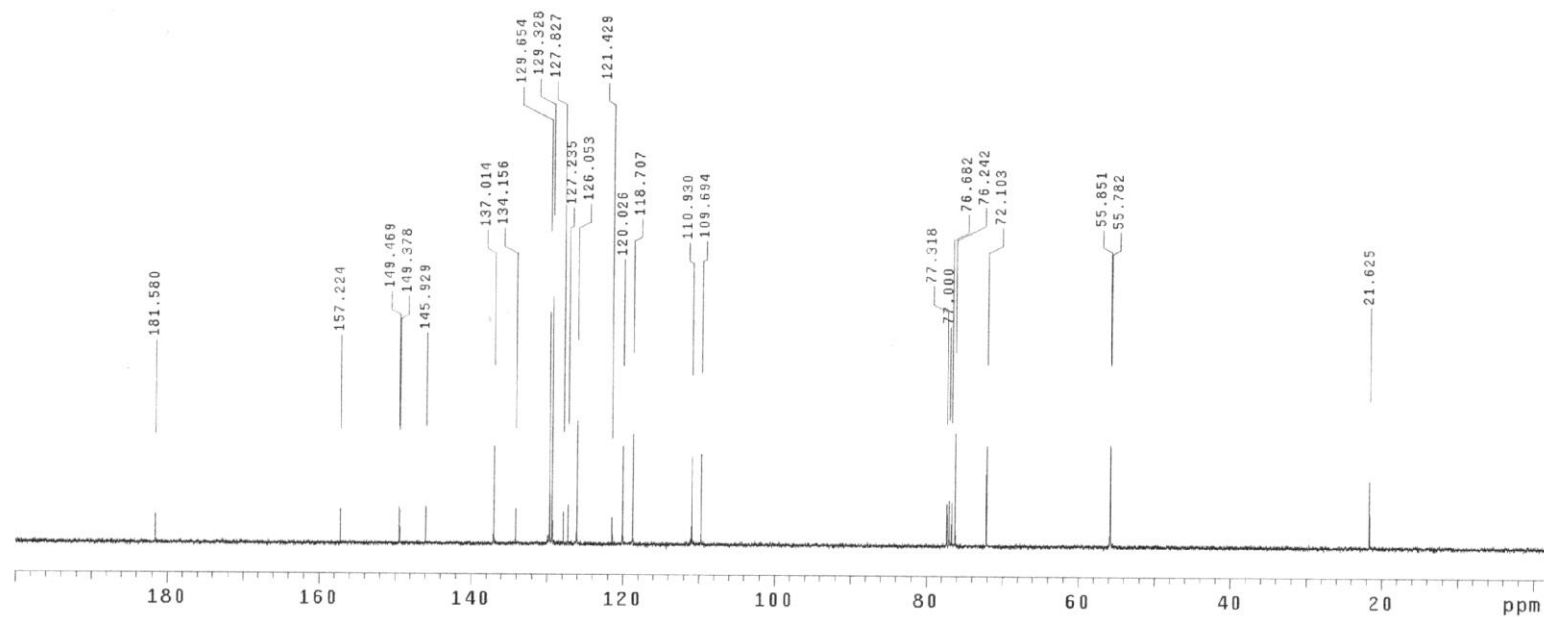

# Compound 4n (<sup>1</sup>H-NMR spectral data)

HAK14A1

Pulse Sequence: s2pu1  
UNITYplus-400 "unity400"  
Date: Jan 22 2018  
Solvent: CDCl<sub>3</sub>  
Ambient temperature  
Total 32 repetitions

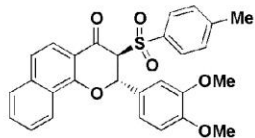

Compound 4n

<sup>1</sup>H NMR (400 MHz, CDCl<sub>3</sub>) spectra

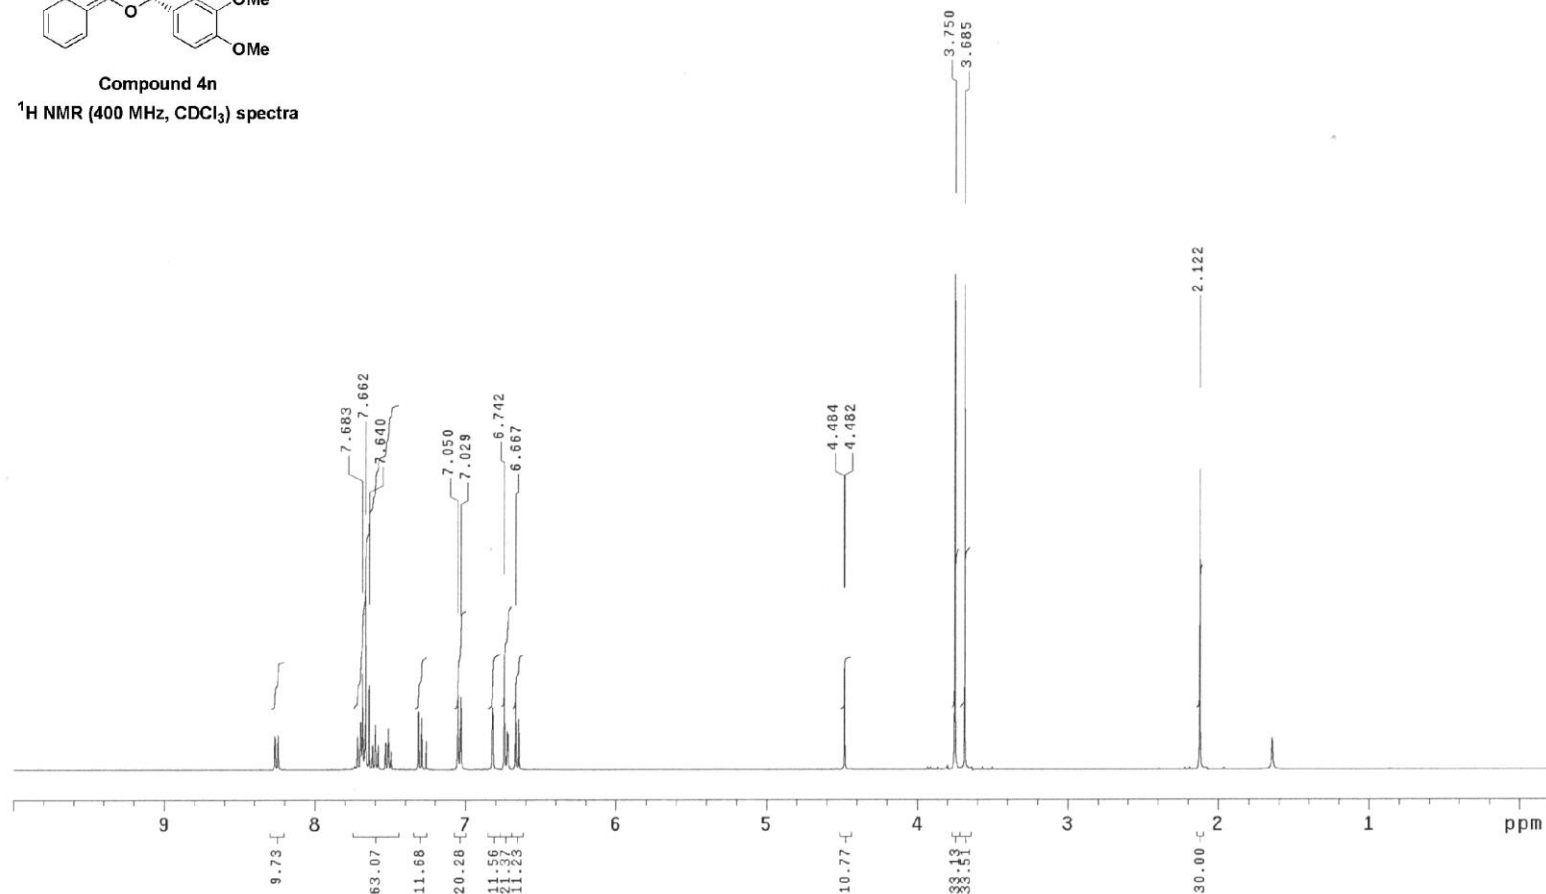

# Compound 4n (<sup>13</sup>C-NMR spectral data)

HAK14A1

Pulse Sequence: s2pul

UNITYplus-400 "unity400"

Date: Jan 22 2018

Solvent: CDCl<sub>3</sub>

Ambient temperature

Total 2096 repetitions

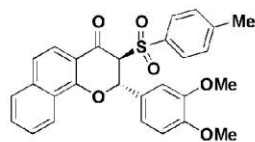

Compound 4n

<sup>13</sup>C NMR (100 MHz, CDCl<sub>3</sub>) spectra

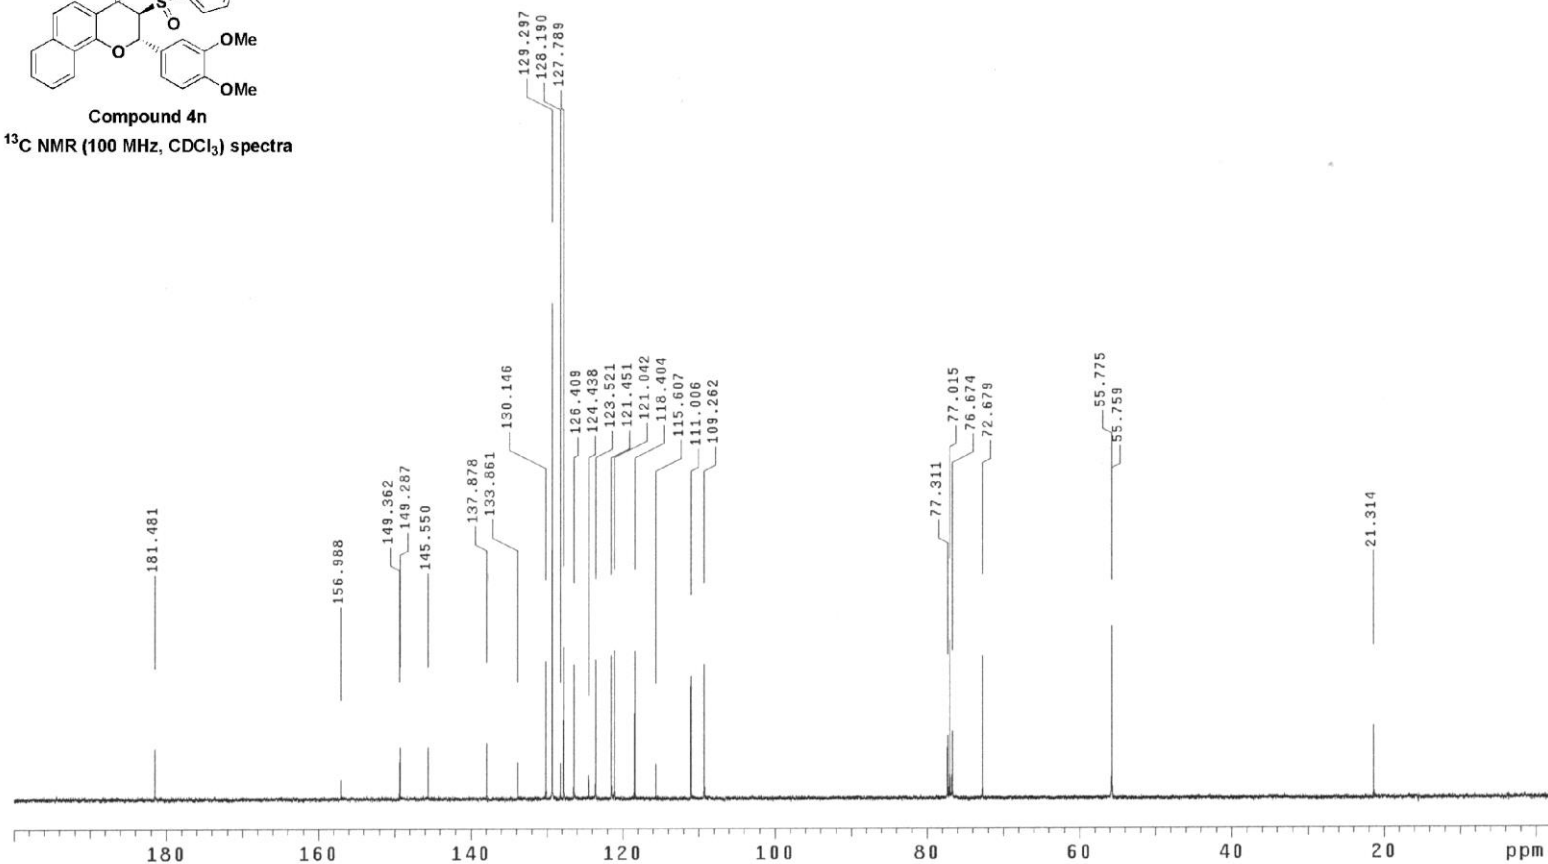

# Compound 4o (<sup>1</sup>H-NMR spectral data)

HAK15Ao

Pulse Sequence: s2pu1  
UNITYplus-400 "unity400"  
Date: Nov 30 2017  
Solvent: CDCl<sub>3</sub>  
Ambient temperature  
Total 32 repetitions

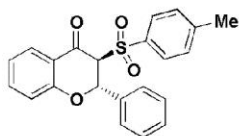

Compound 4o

<sup>1</sup>H NMR (400 MHz, CDCl<sub>3</sub>) spectra

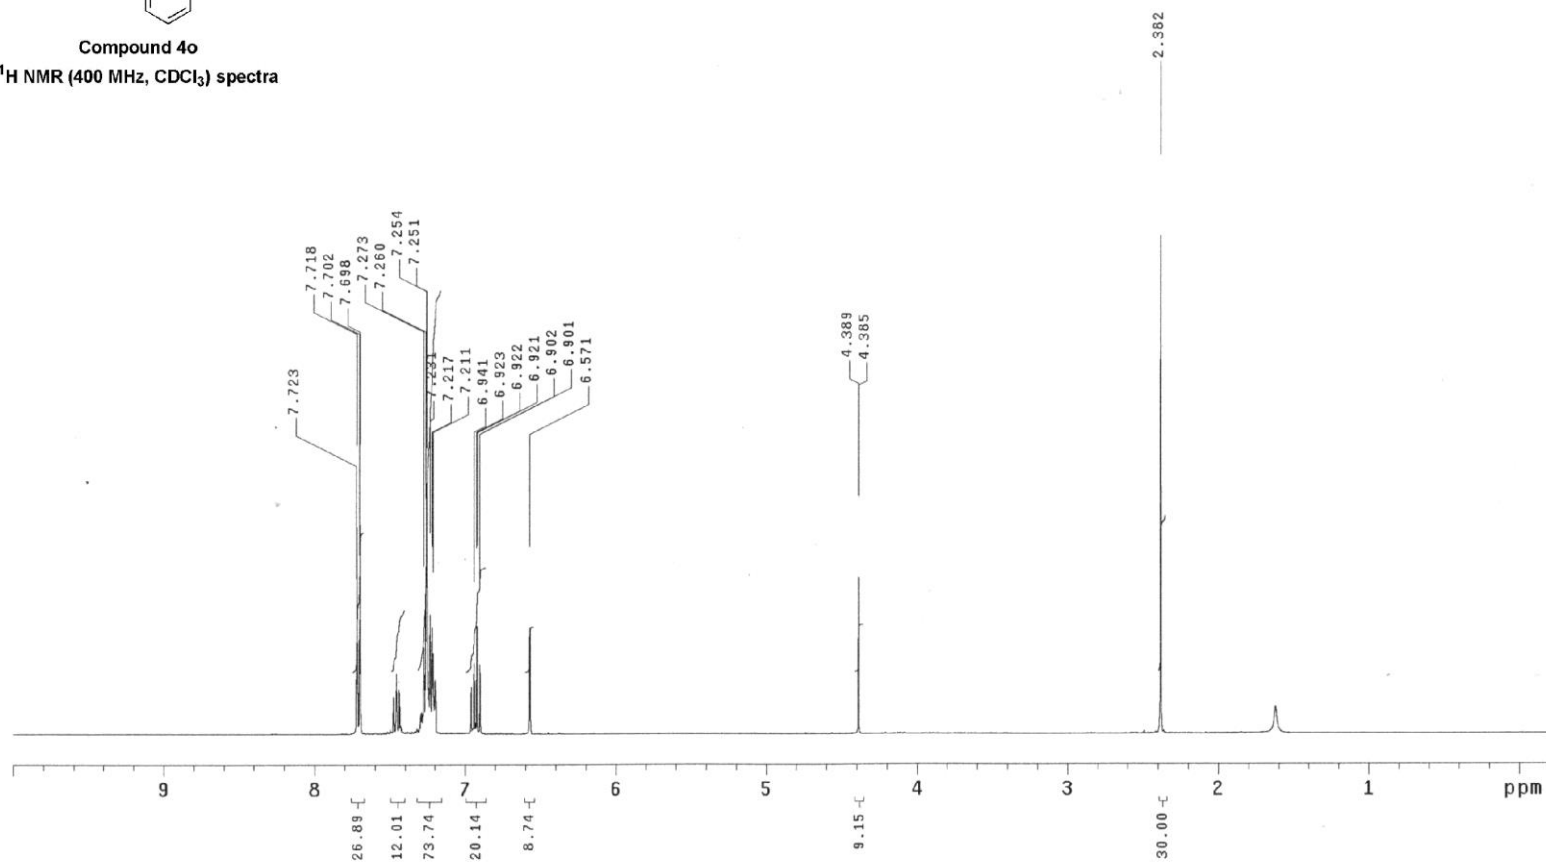

# Compound 4o ( $^{13}\text{C}$ -NMR spectral data)

HAK15Ao

Pulse Sequence: s2pu1

UNITYplus-400 "unity400"

Date: Nov 30 2017

Solvent:  $\text{CDCl}_3$

Ambient temperature

Total 3056 repetitions

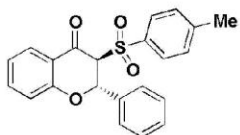

Compound 4o

$^{13}\text{C}$  NMR (100 MHz,  $\text{CDCl}_3$ ) spectra

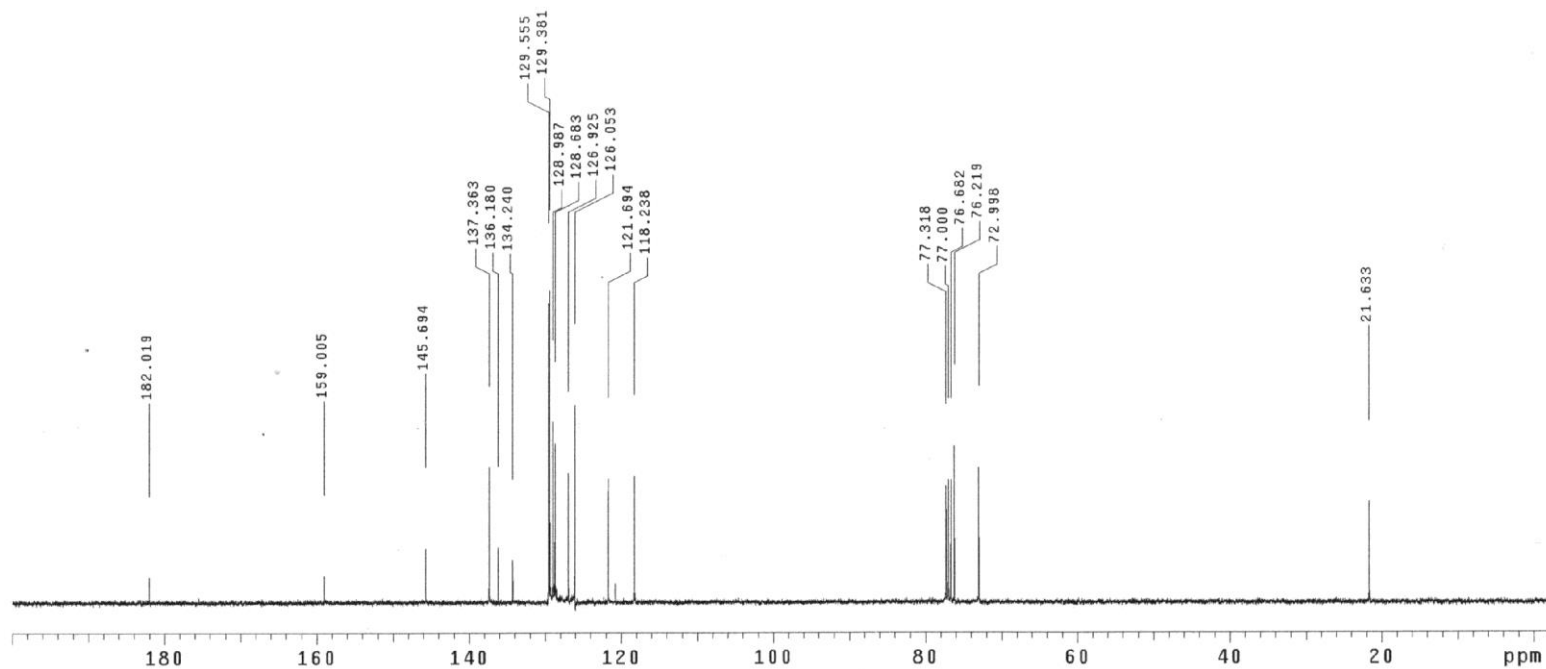

# Compound 4p (<sup>1</sup>H-NMR spectral data)

HAK1A4

Pulse Sequence: s2pu1

UNITYplus-400 "unity400"

Date: Dec 4 2017

Solvent: CDCl<sub>3</sub>

Ambient temperature

Total 32 repetitions

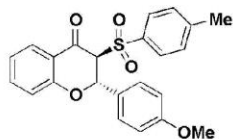

Compound 4p

<sup>13</sup>C NMR (100 MHz, CDCl<sub>3</sub>) spectra

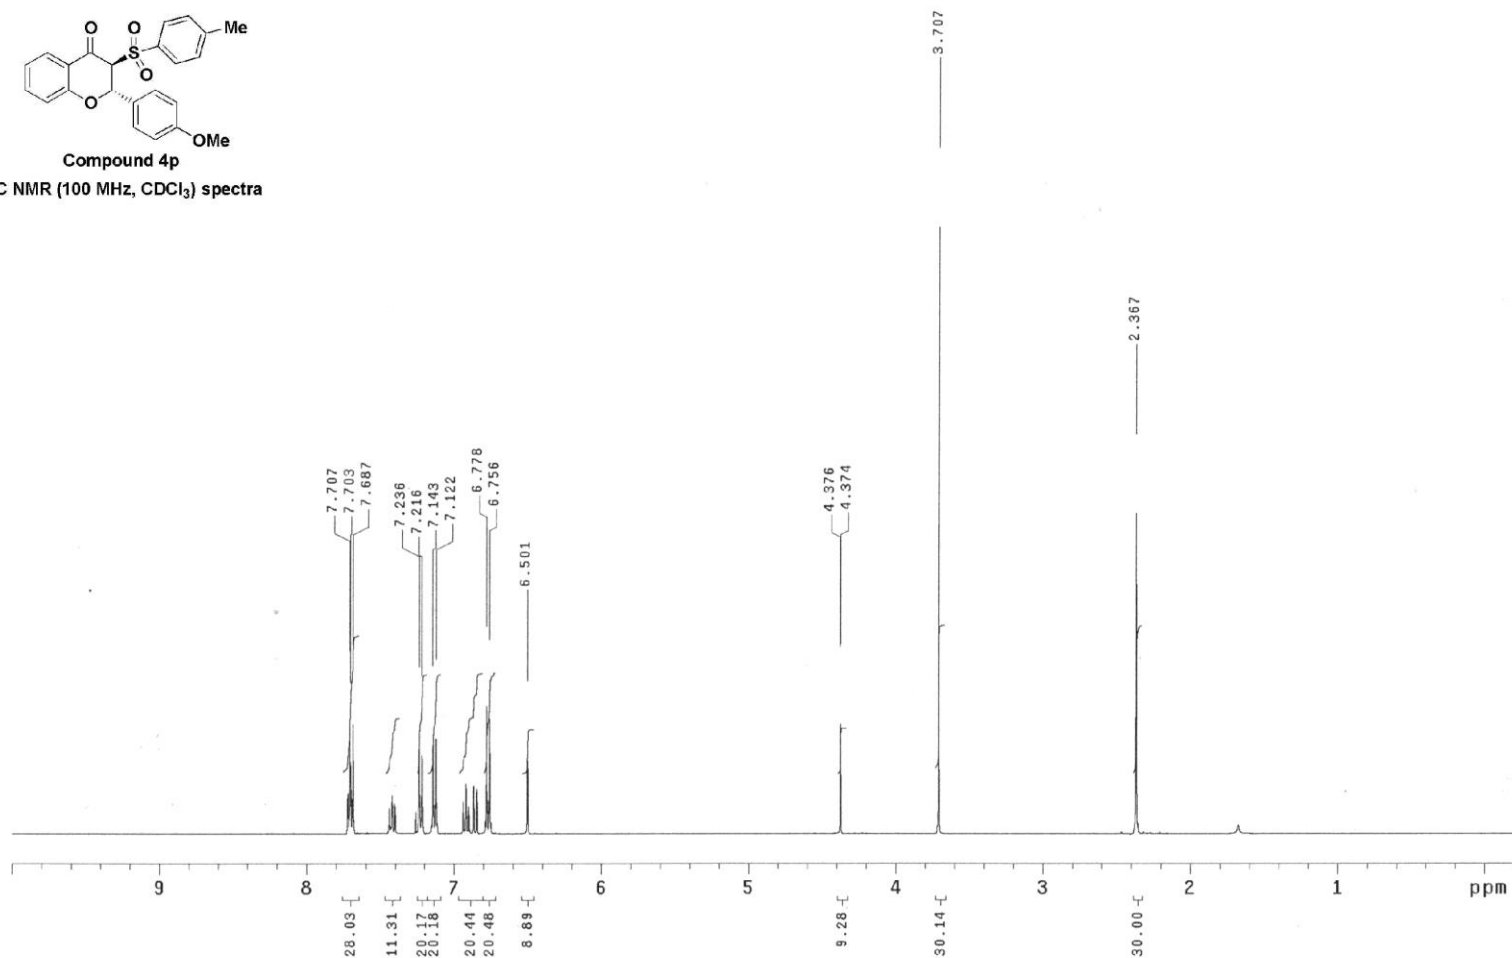



# Compound 4p (<sup>13</sup>C-NMR spectral data)

HAK1A4

Pulse Sequence: s2pu1  
 UNITYplus-400 "unity400"  
 Date: Dec 4 2017  
 Solvent: CDCl<sub>3</sub>  
 Ambient temperature  
 Total 1120 repetitions

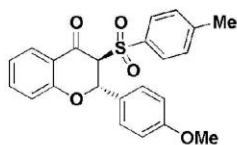

Compound 4p

<sup>1</sup>H NMR (400 MHz, CDCl<sub>3</sub>) spectra

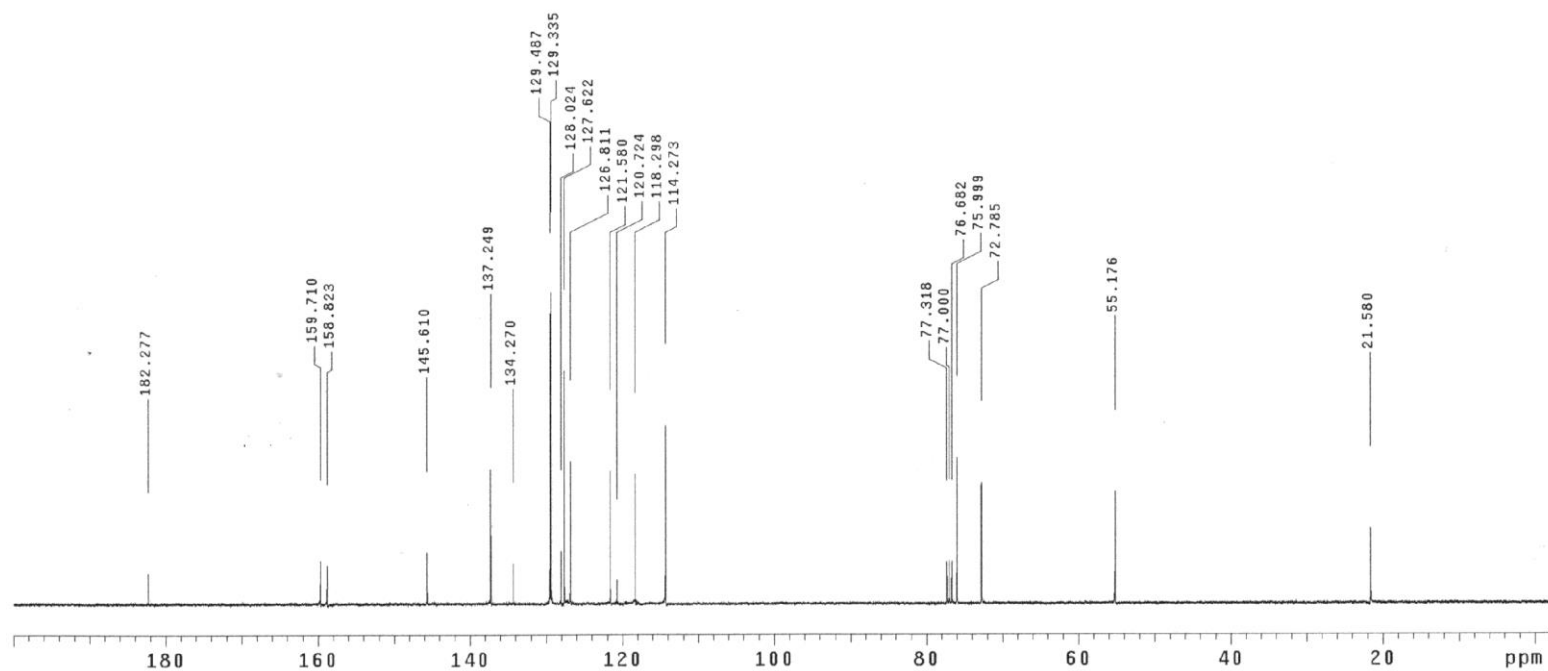

# Compound 4q (<sup>1</sup>H-NMR spectral data)

HAK1A3

Pulse Sequence: s2pu1  
 UNITYplus-400 "unity400"  
 Date: Dec 4 2017  
 Solvent: CDCl<sub>3</sub>  
 Ambient temperature  
 Total 32 repetitions

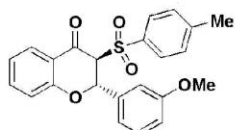

Compound 4q

<sup>13</sup>C NMR (100 MHz, CDCl<sub>3</sub>) spectra

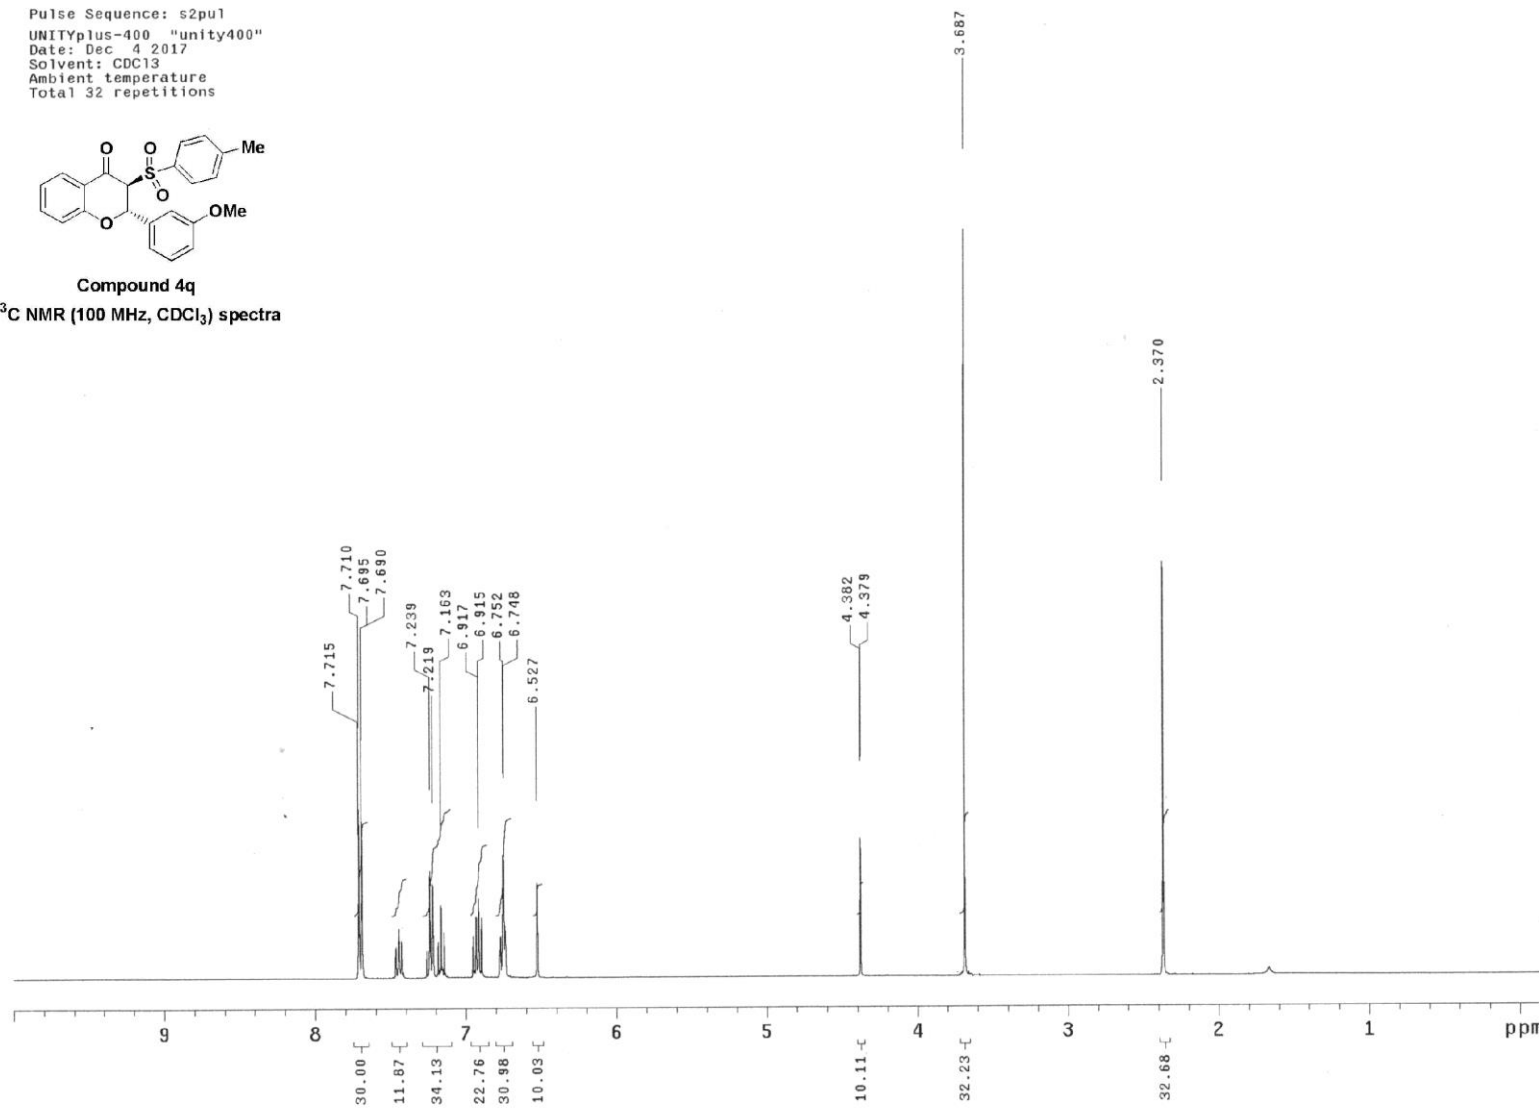

# Compound 4q (<sup>13</sup>C-NMR spectral data)

HAK1A3

Pulse Sequence: s2pu1  
 UNITYplus-400 "unity400"  
 Date: Dec 4 2017  
 Solvent: CDCl<sub>3</sub>  
 Ambient temperature  
 Total 848 repetitions

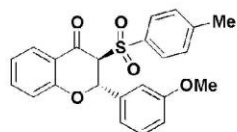

Compound 4q

<sup>1</sup>H NMR (400 MHz, CDCl<sub>3</sub>) spectra

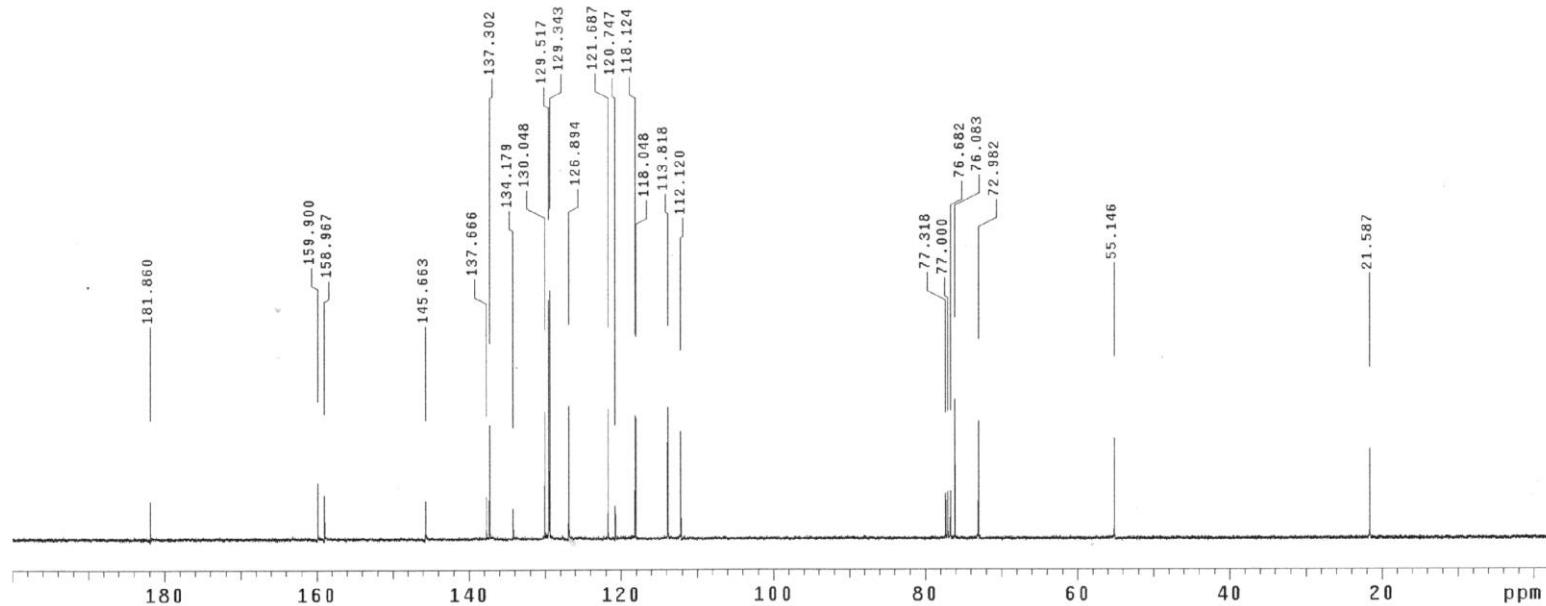

# Compound 4r (<sup>1</sup>H-NMR spectral data)

HAK1A5

Pulse Sequence: s2pu1

UNITYplus-400 "unity400"

Date: Dec 6 2017

Solvent: CDCl<sub>3</sub>

Ambient temperature

Total 32 repetitions

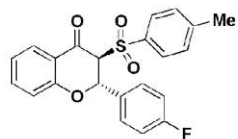

Compound 4r

<sup>1</sup>H NMR (400 MHz, CDCl<sub>3</sub>) spectra

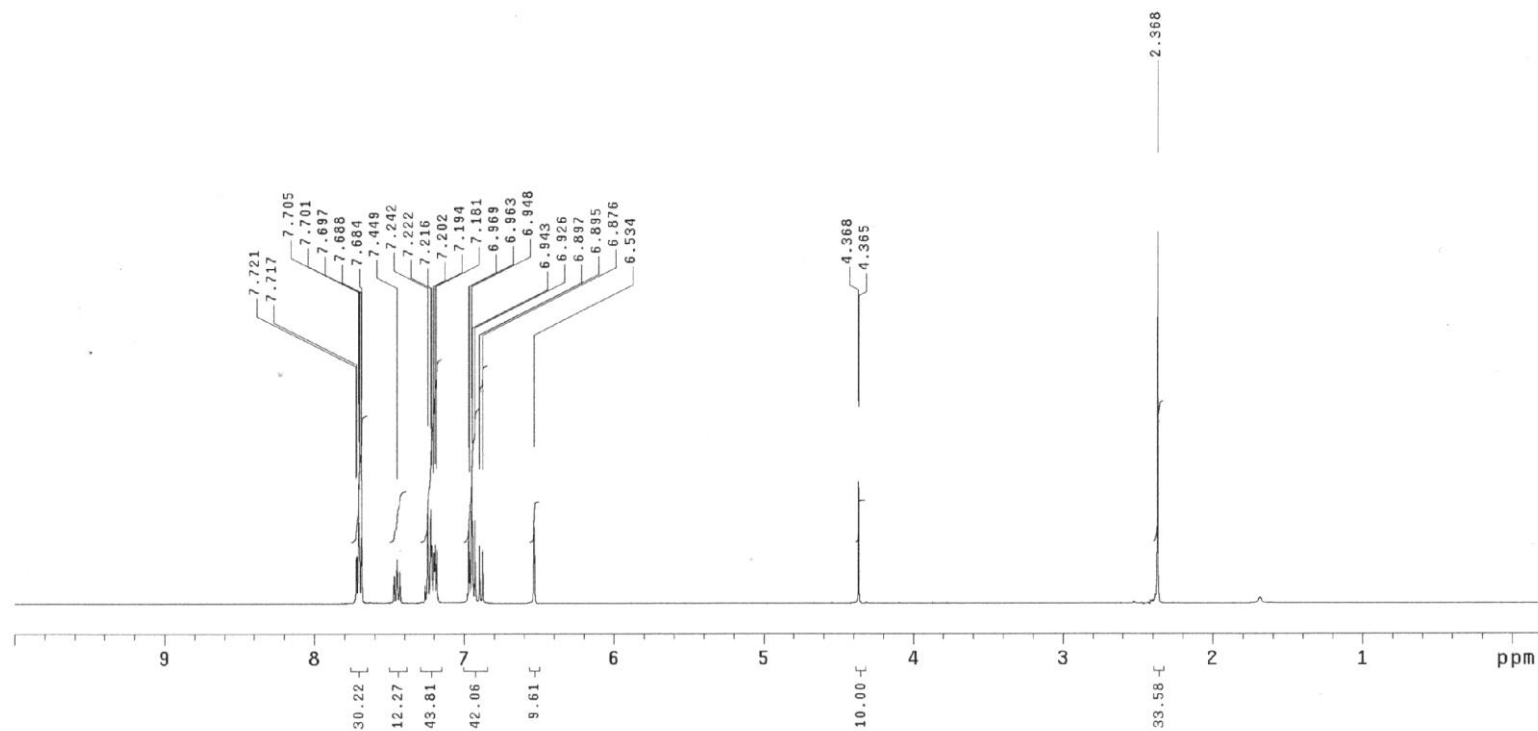

# Compound 4r (<sup>13</sup>C-NMR spectral data)

HAK1A5

Pulse Sequence: s2pul  
UNITYplus-400 "unity400"  
Date: Dec 6 2017  
Solvent: CDCl<sub>3</sub>  
Ambient temperature  
Total 512 repetitions

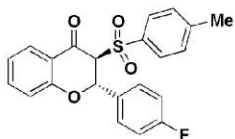

Compound 4r

<sup>13</sup>C NMR (100 MHz, CDCl<sub>3</sub>) spectra

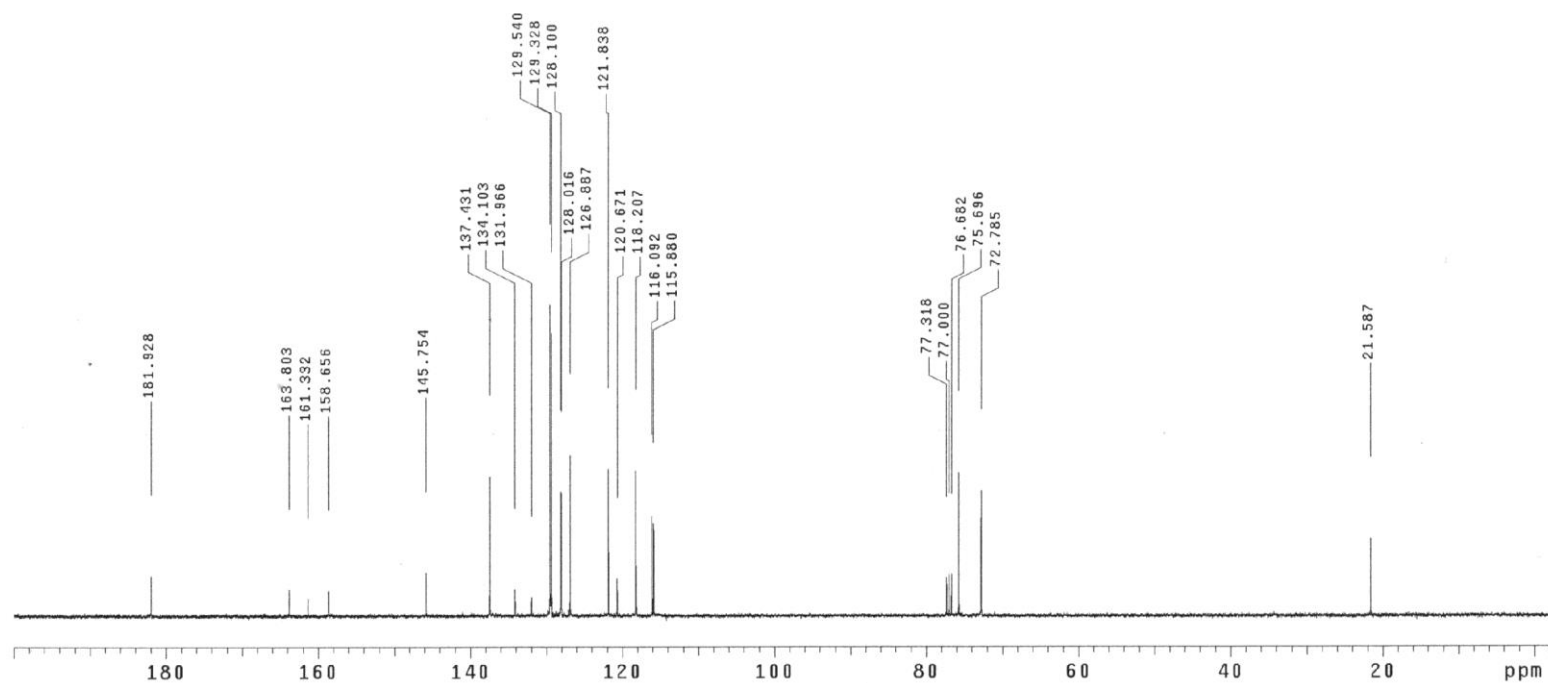

# Compound 4s (<sup>1</sup>H-NMR spectral data)

HAK1A6

Pulse Sequence: s2pu1

UNITYplus-400 "unity400"

Date: Dec 8 2017

Solvent: CDCl<sub>3</sub>

Ambient temperature

Total 32 repetitions

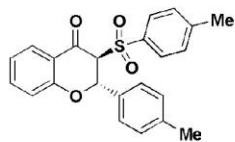

Compound 4s

<sup>1</sup>H NMR (400 MHz, CDCl<sub>3</sub>) spectra

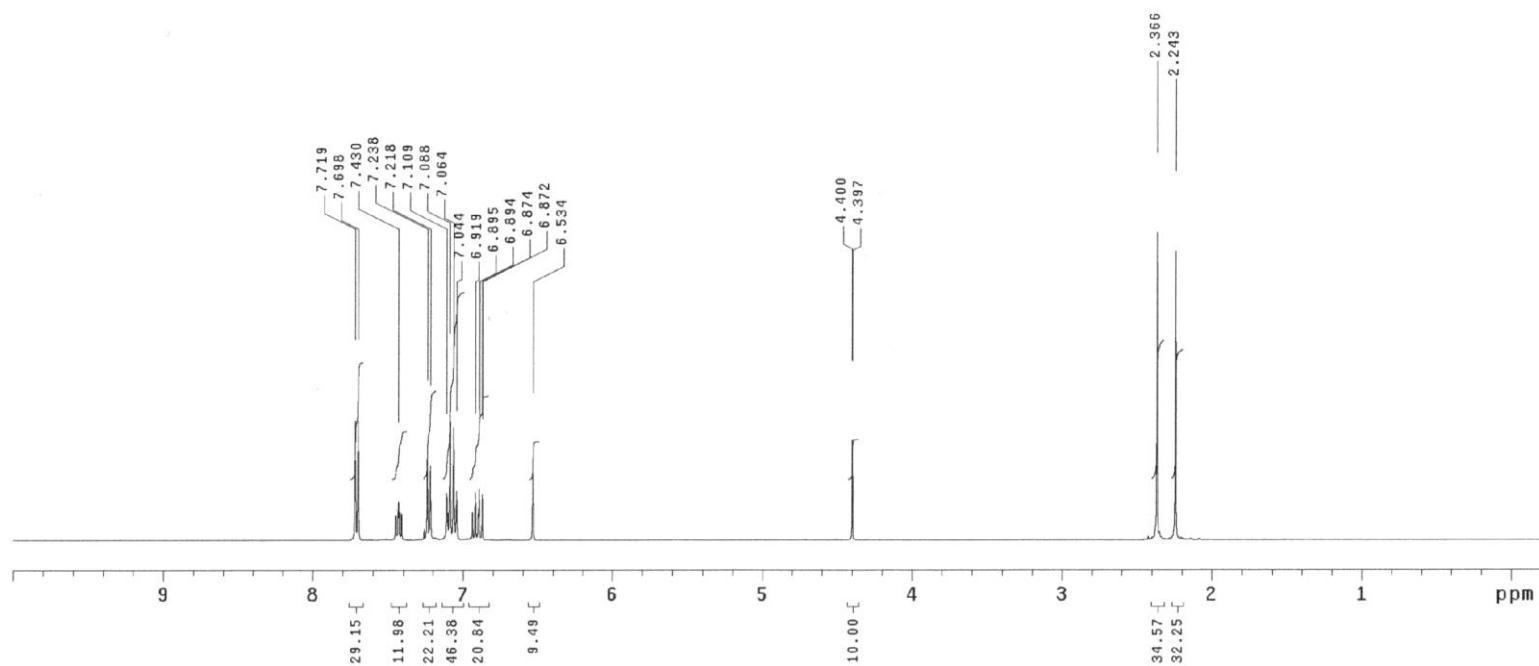

# Compound 4s (<sup>13</sup>C-NMR spectral data)

HAK1A6

Pulse Sequence: s2pu1

UNITYplus-400 "unity400"

Date: Dec 8 2017

Solvent: CDCl<sub>3</sub>

Ambient temperature

Total 736 repetitions

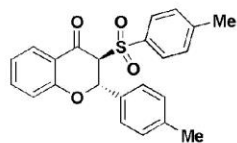

Compound 4s

<sup>13</sup>C NMR (100 MHz, CDCl<sub>3</sub>) spectra

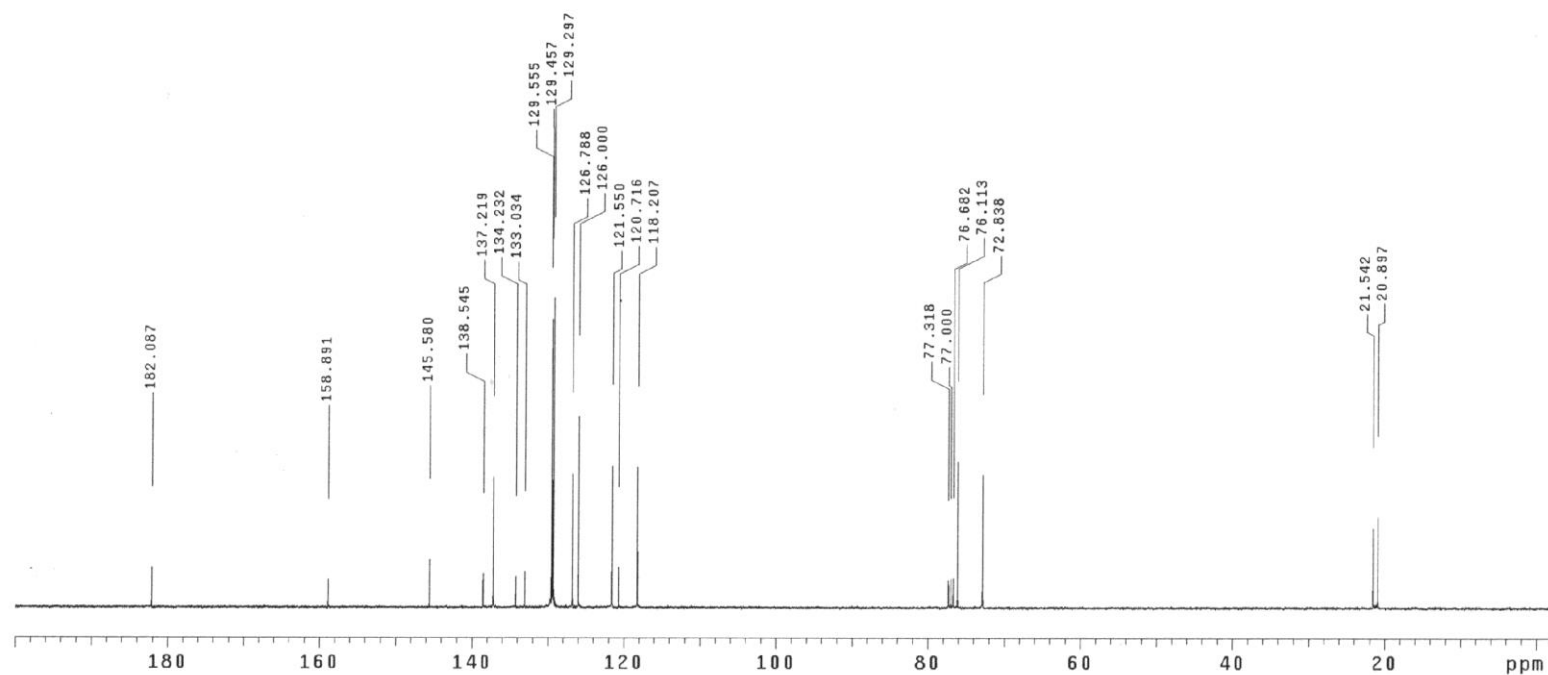

# Compound 4t (<sup>1</sup>H-NMR spectral data)

HAK1A7

Pulse Sequence: s2pu1  
UNITYplus-400 "unity400"  
Date: Dec 8 2017  
Solvent: CDCl<sub>3</sub>  
Ambient temperature  
Total 32 repetitions

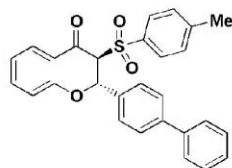

Compound 4t

<sup>1</sup>H NMR (400 MHz, CDCl<sub>3</sub>) spectra

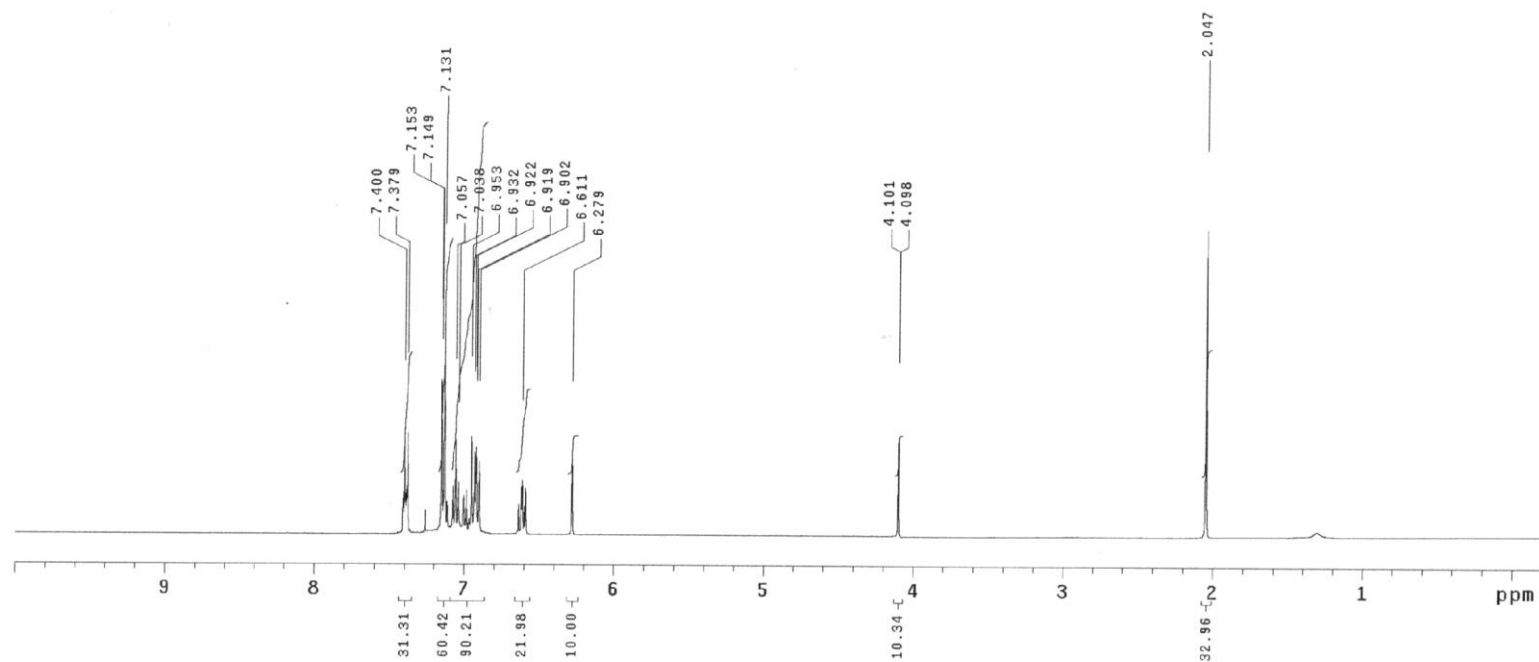



# Compound 4t (<sup>13</sup>C-NMR spectral data)

HAK1A7

Pulse Sequence: s2pu1

UNITYplus-400 "unity400"

Date: Dec 8 2017

Solvent: CDCl<sub>3</sub>

Ambient temperature

Total 1408 repetitions

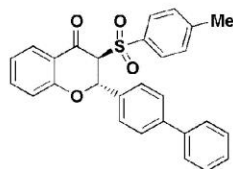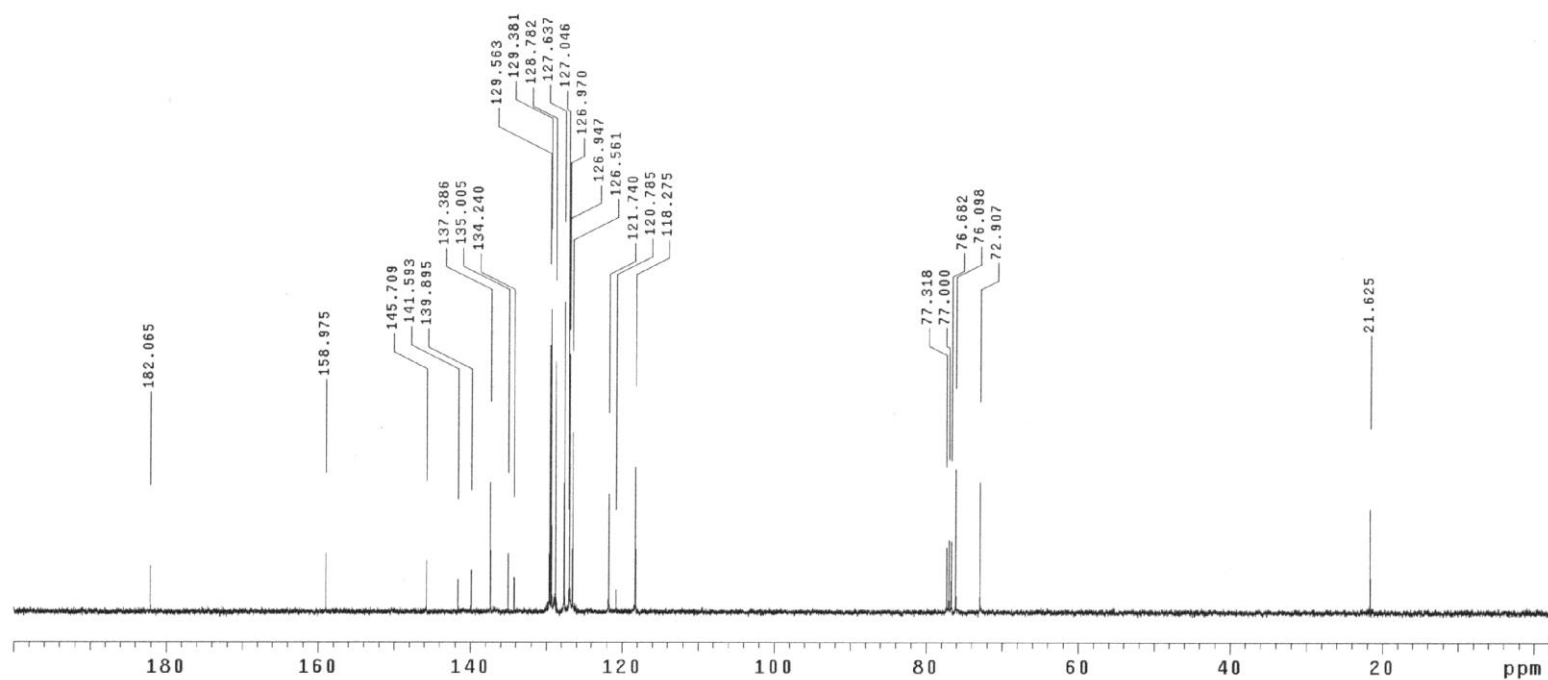

# Compound 4u (<sup>1</sup>H-NMR spectral data)

HAK1A8

Pulse Sequence: s2pu1

UNITYplus-400 "unity400"

Date: Dec 14 2017

Solvent: CDCl<sub>3</sub>

Ambient temperature

Total 32 repetitions

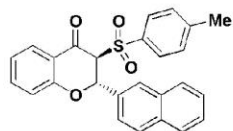

Compound 4u

<sup>1</sup>H NMR (400 MHz, CDCl<sub>3</sub>) spectra

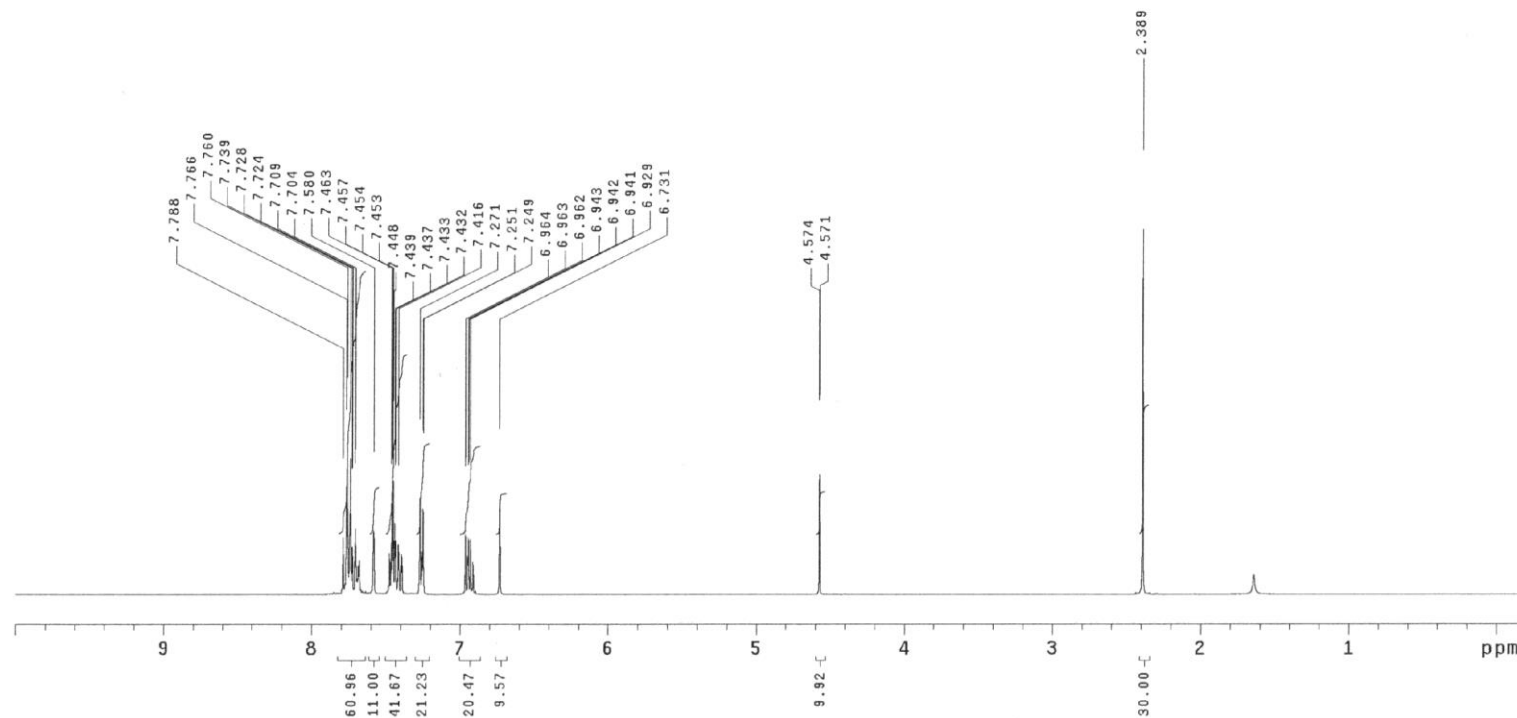

# Compound 4u ( $^{13}\text{C}$ -NMR spectral data)

HAK1A8

Pulse Sequence: s2pu1  
UNITYplus-400 "unity400"  
Date: Dec 14 2017  
Solvent: CDCl<sub>3</sub>  
Ambient temperature  
Total 1056 repetitions

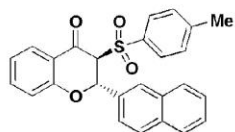

Compound 4u

$^{13}\text{C}$  NMR (100 MHz, CDCl<sub>3</sub>) spectra

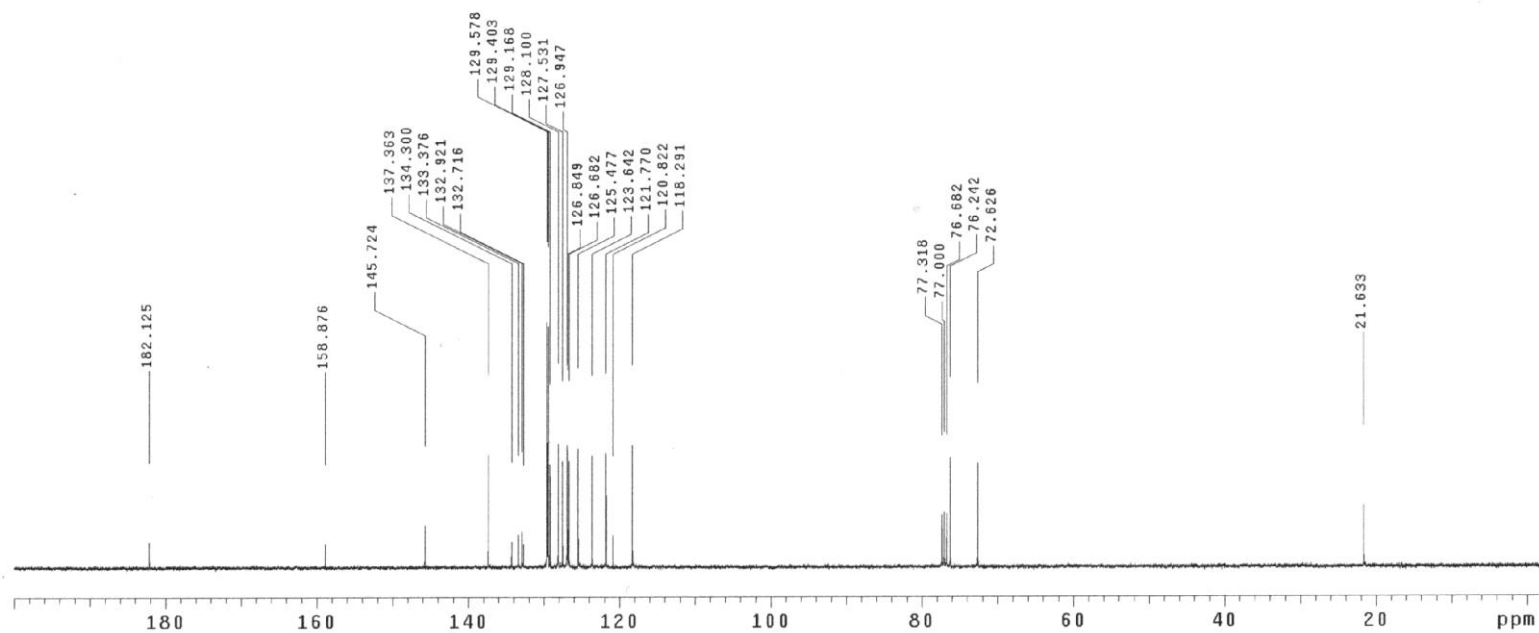

# Compound 4v (<sup>1</sup>H-NMR spectral data)

HAK1A9

Pulse Sequence: s2pu1

UNITYplus-400 "unity400"

Date: Dec 21 2017

Solvent: CDCl<sub>3</sub>

Ambient temperature

Total 32 repetitions

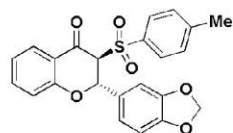

Compound 4v

<sup>1</sup>H NMR (400 MHz, CDCl<sub>3</sub>) spectra

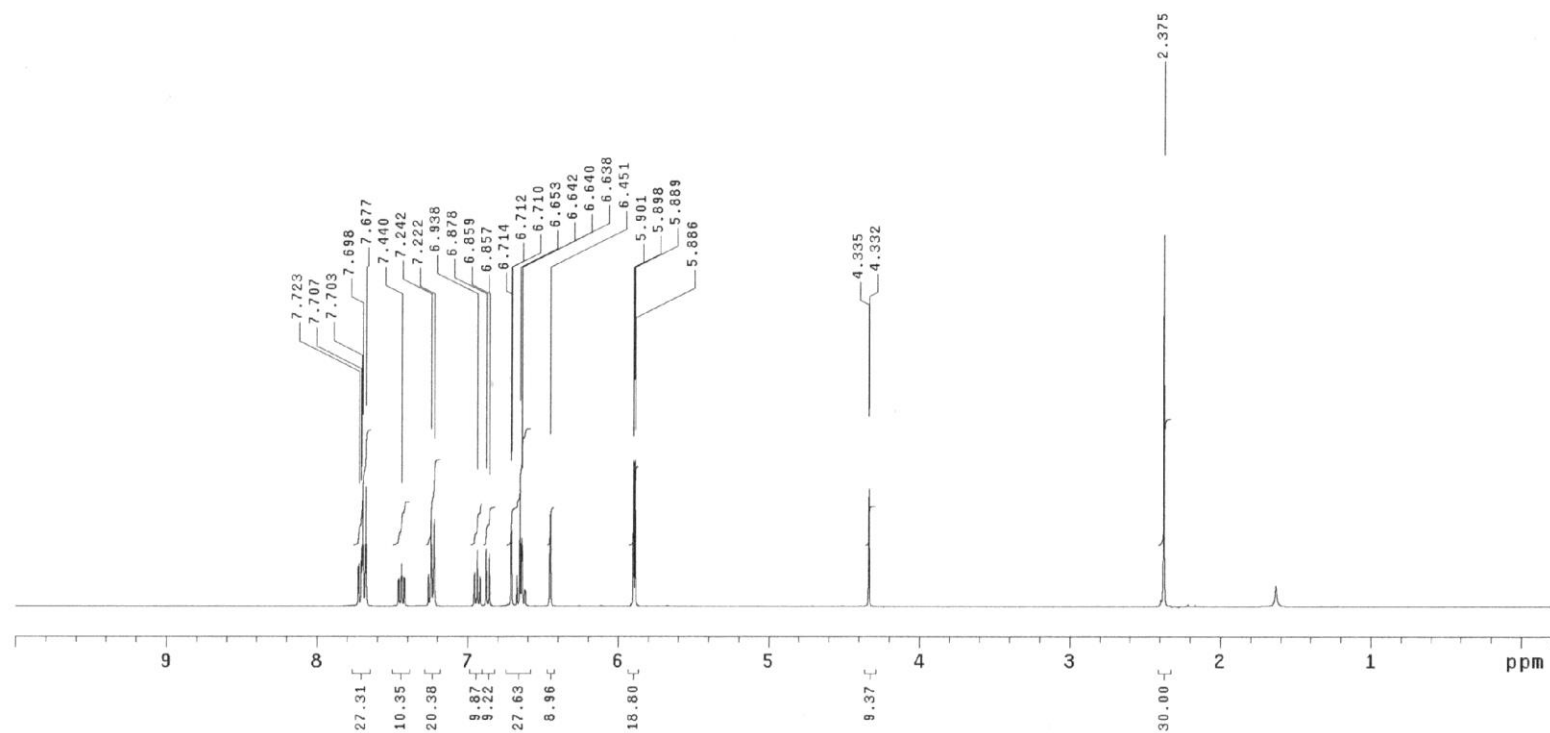

# Compound 4v (<sup>13</sup>C-NMR spectral data)

HAK1A9

Pulse Sequence: s2pu1

UNITYplus-400 "unity400"

Date: Dec 21 2017

Solvent: CDCl<sub>3</sub>

Ambient temperature

Total 1216 repetitions

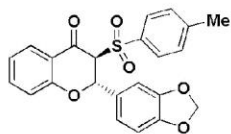

Compound 4v

<sup>13</sup>C NMR (100 MHz, CDCl<sub>3</sub>) spectra

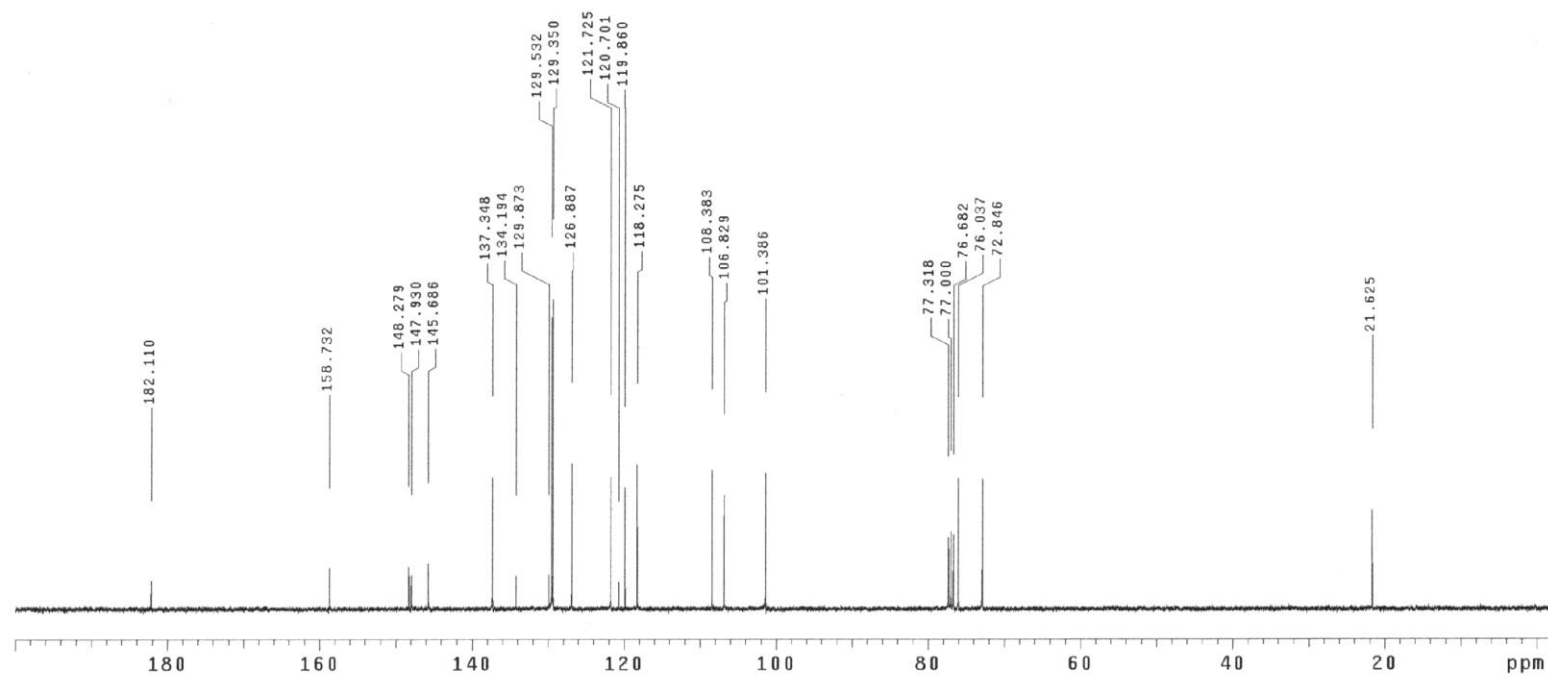

# Compound 4w (<sup>1</sup>H-NMR spectral data)

HAK1A10

Pulse Sequence: s2pu1

UNITYplus-400 "unity400"

Date: Dec 21 2017

Solvent: CDCl<sub>3</sub>

Ambient temperature

Total 32 repetitions

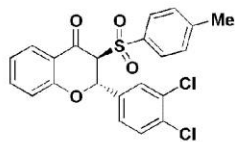

Compound 4w

<sup>1</sup>H NMR (400 MHz, CDCl<sub>3</sub>) spectra

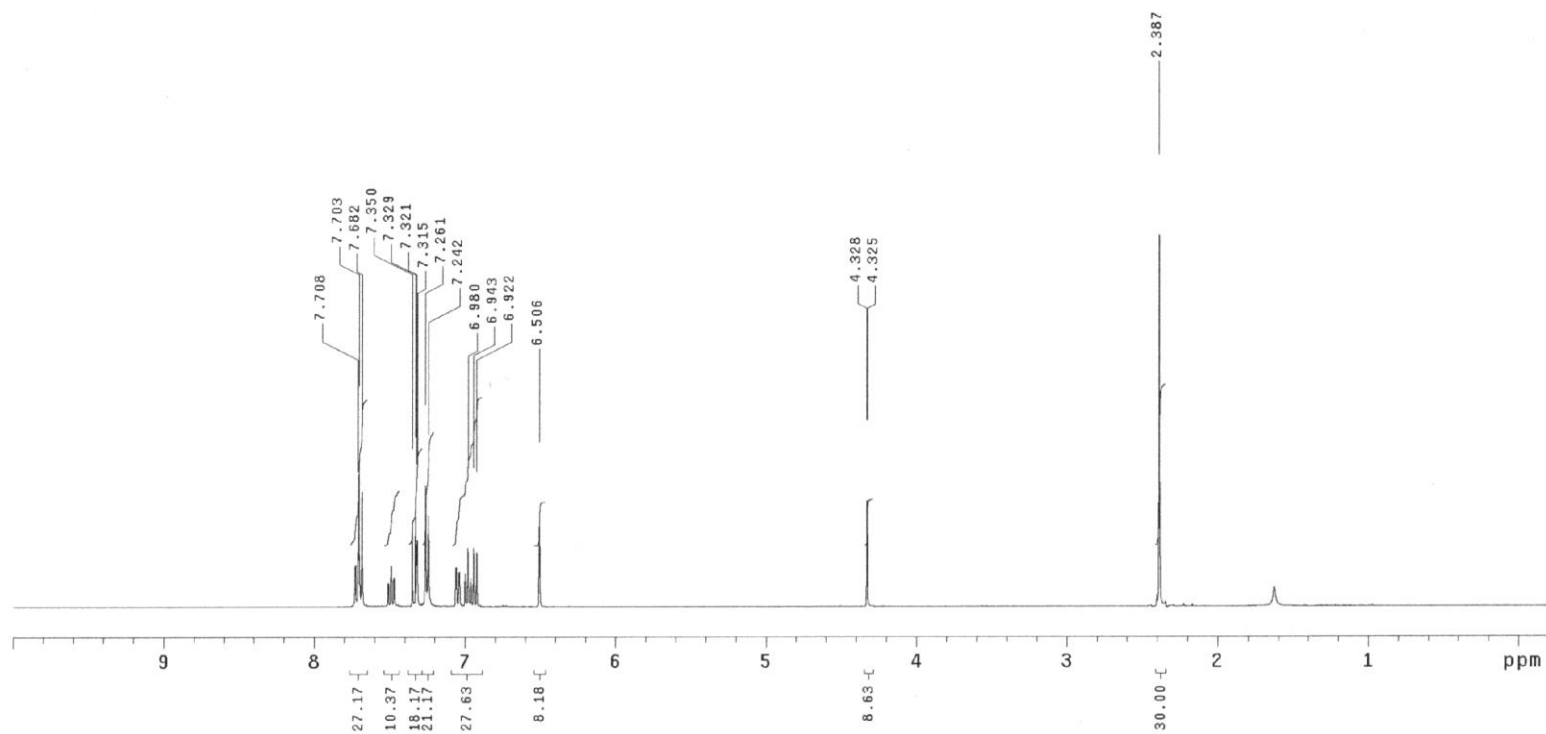

# Compound 4w (<sup>13</sup>C-NMR spectral data)

HAK1A10

Pulse Sequence: s2pu1

UNITYplus-400 "unity400"

Date: Dec 21 2017

Solvent: CDCl<sub>3</sub>

Ambient temperature

Total 1072 repetitions

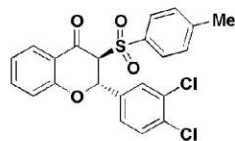

Compound 4w

<sup>13</sup>C NMR (100 MHz, CDCl<sub>3</sub>) spectra

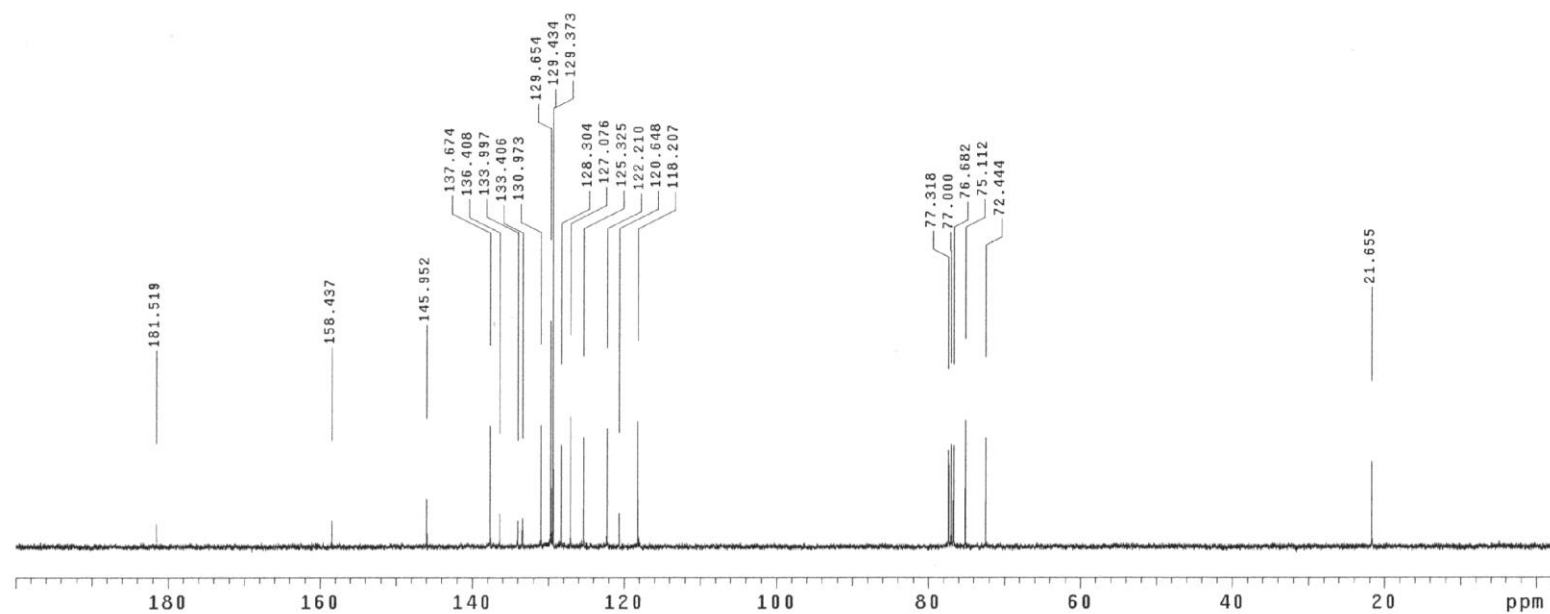

# Compound 4x (<sup>1</sup>H-NMR spectral data)

HAK1A11

Pulse Sequence: s2pu1

UNITYplus-400 "unity400"

Date: Dec 29 2017

Solvent: CDCl<sub>3</sub>

Ambient temperature

Total 32 repetitions

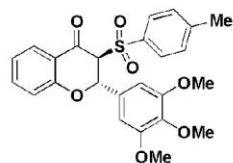

Compound 4x

<sup>1</sup>H NMR (400 MHz, CDCl<sub>3</sub>) spectra

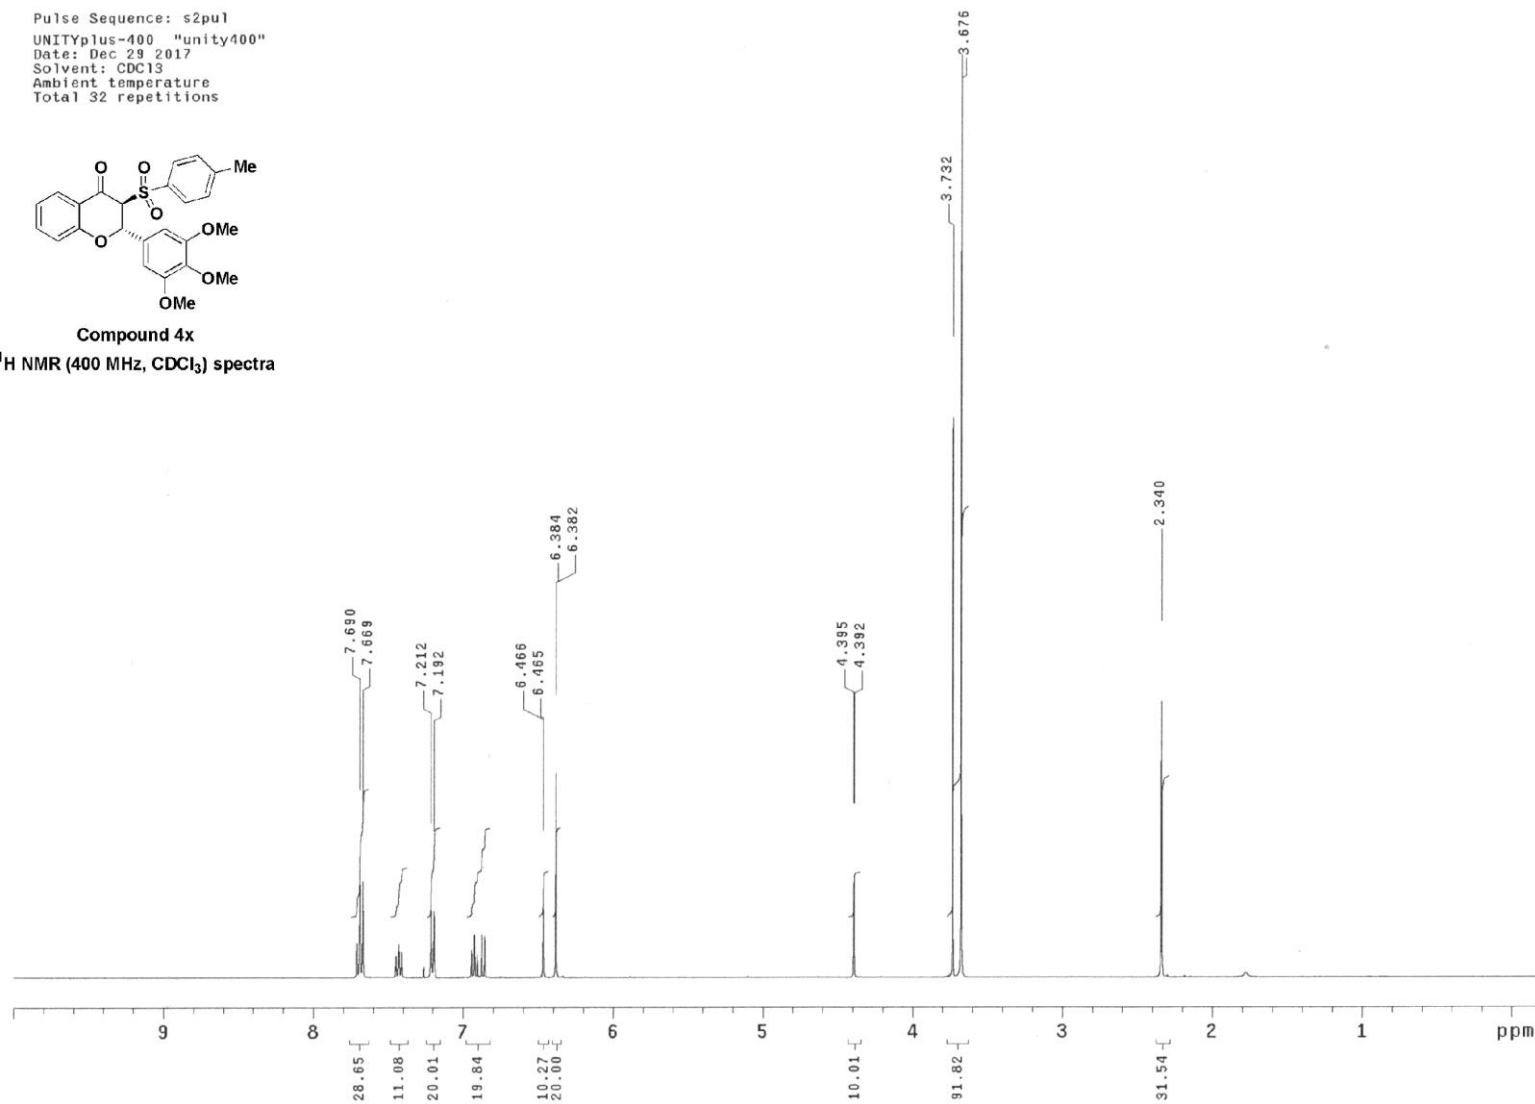



# Compound 4x ( $^{13}\text{C}$ -NMR spectral data)

HAK1A11

Pulse Sequence: s2pu1

UNITYplus-400 "unity400"

Date: Dec 29 2017

Solvent:  $\text{CDCl}_3$

Ambient temperature

Total 576 repetitions

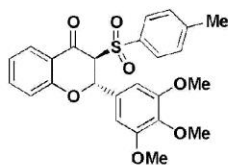

Compound 4x

$^{13}\text{C}$  NMR (100 MHz,  $\text{CDCl}_3$ ) spectra

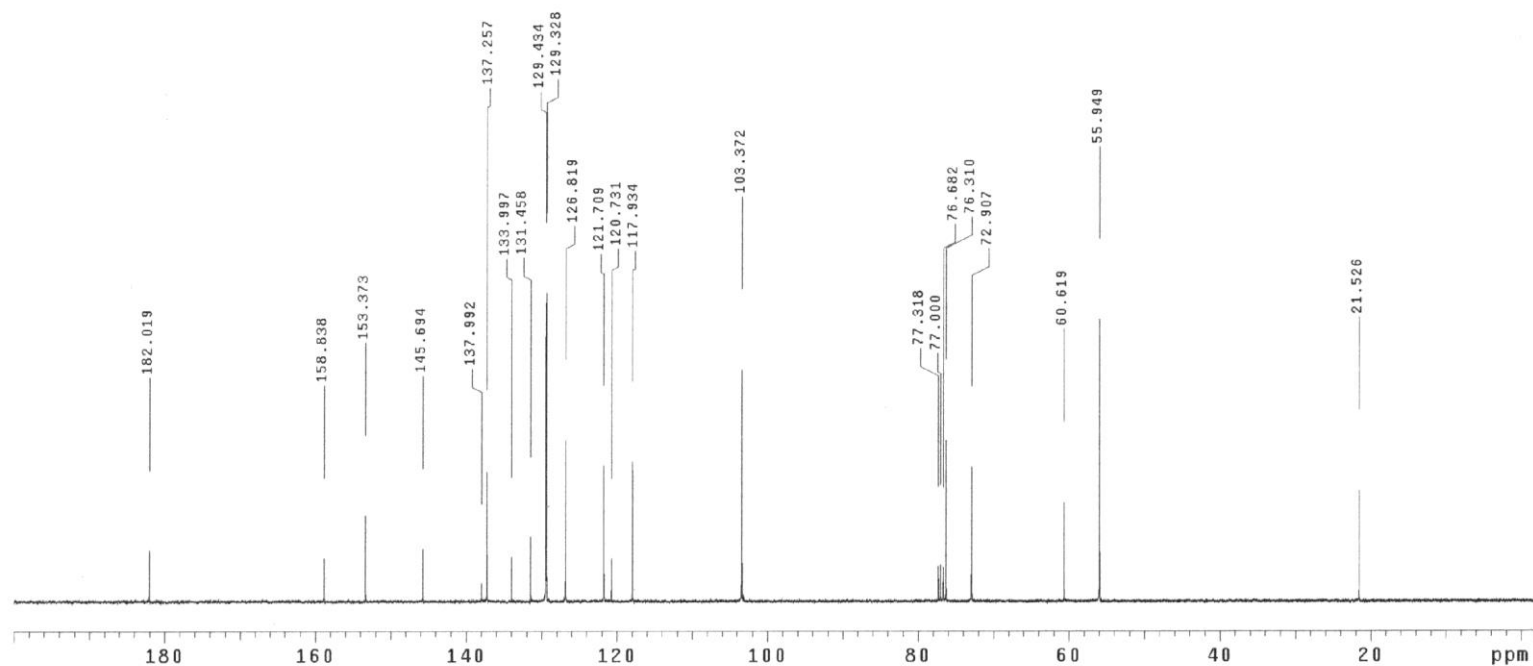

# Compound 4y (<sup>1</sup>H-NMR spectral data)

HAK1A12

Pulse Sequence: s2pu1  
 UNITYplus-400 "unity400"  
 Date: Jan 8 2018  
 Solvent: CDCl<sub>3</sub>  
 Ambient temperature  
 Total 32 repetitions

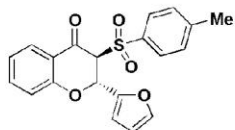

Compound 4y

<sup>1</sup>H NMR (400 MHz, CDCl<sub>3</sub>) spectra

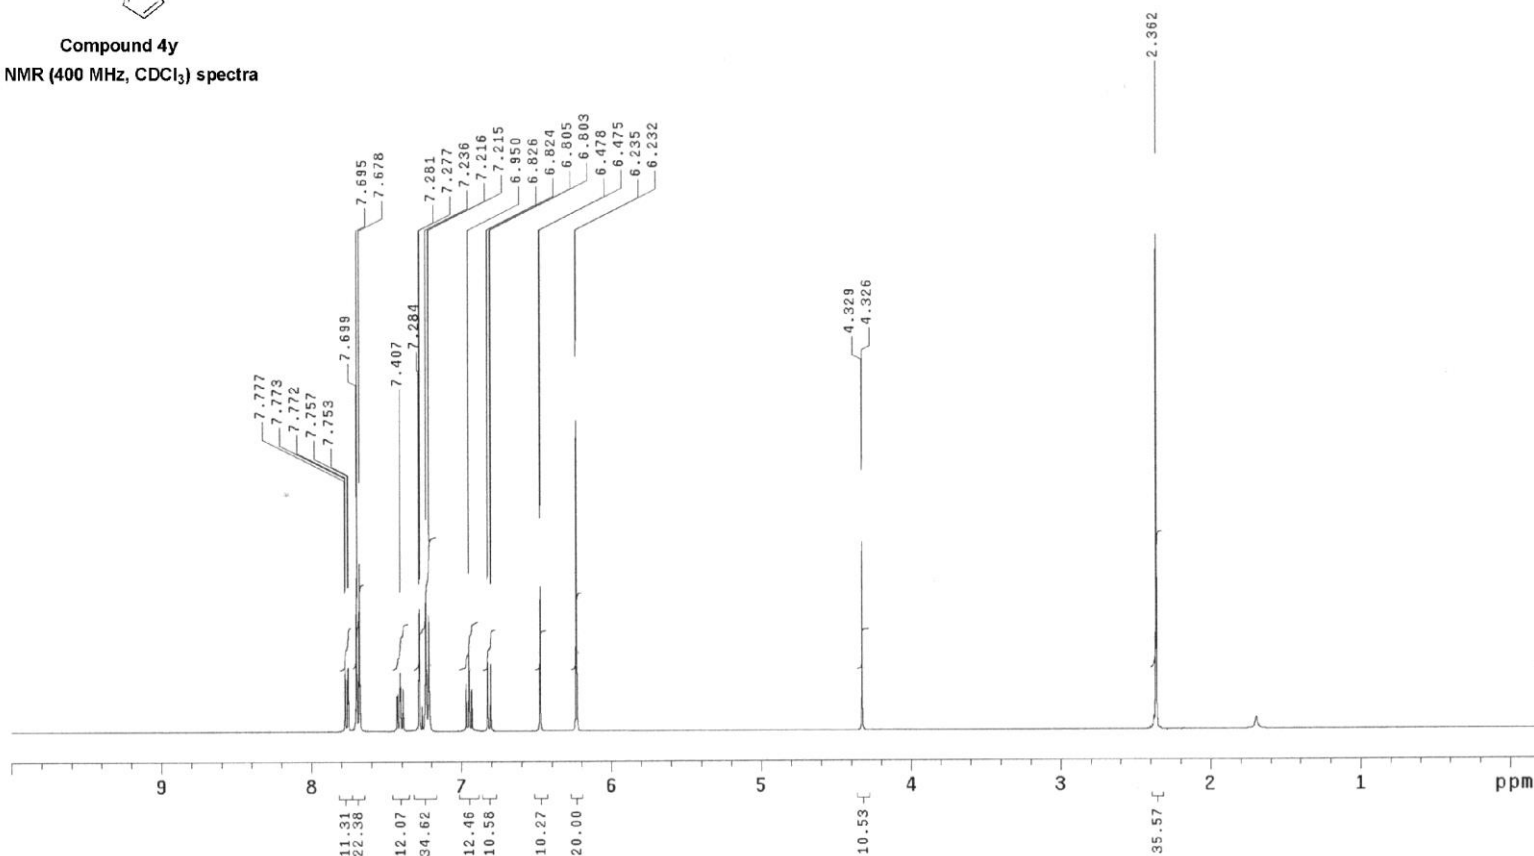

# Compound 4y (<sup>13</sup>C-NMR spectral data)

HAK1A12

Pulse Sequence: s2pu1  
 UNITYplus-400 "unity400"  
 Date: Jan 8 2018  
 Solvent: CDCl<sub>3</sub>  
 Ambient temperature  
 Total 928 repetitions

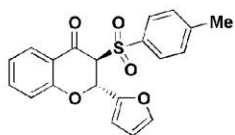

Compound 4y

<sup>13</sup>C NMR (100 MHz, CDCl<sub>3</sub>) spectra

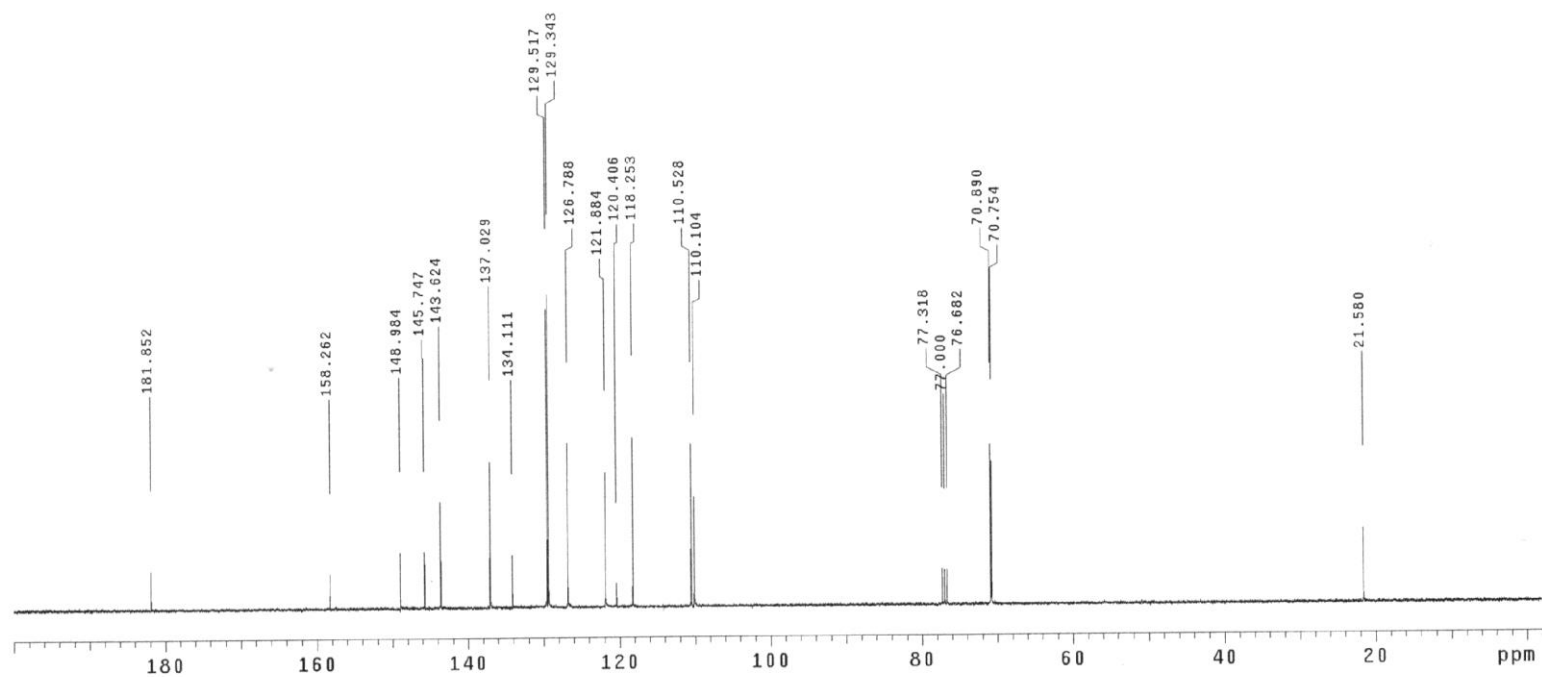

# Compound 4z (<sup>1</sup>H-NMR spectral data)

HAK1A13

Pulse Sequence: s2pu1  
 UNITYplus-400 "unity400"  
 Date: Jan 9 2018  
 Solvent: CDCl<sub>3</sub>  
 Ambient temperature  
 Total 32 repetitions

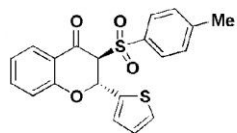

Compound 4z

<sup>1</sup>H NMR (400 MHz, CDCl<sub>3</sub>) spectra

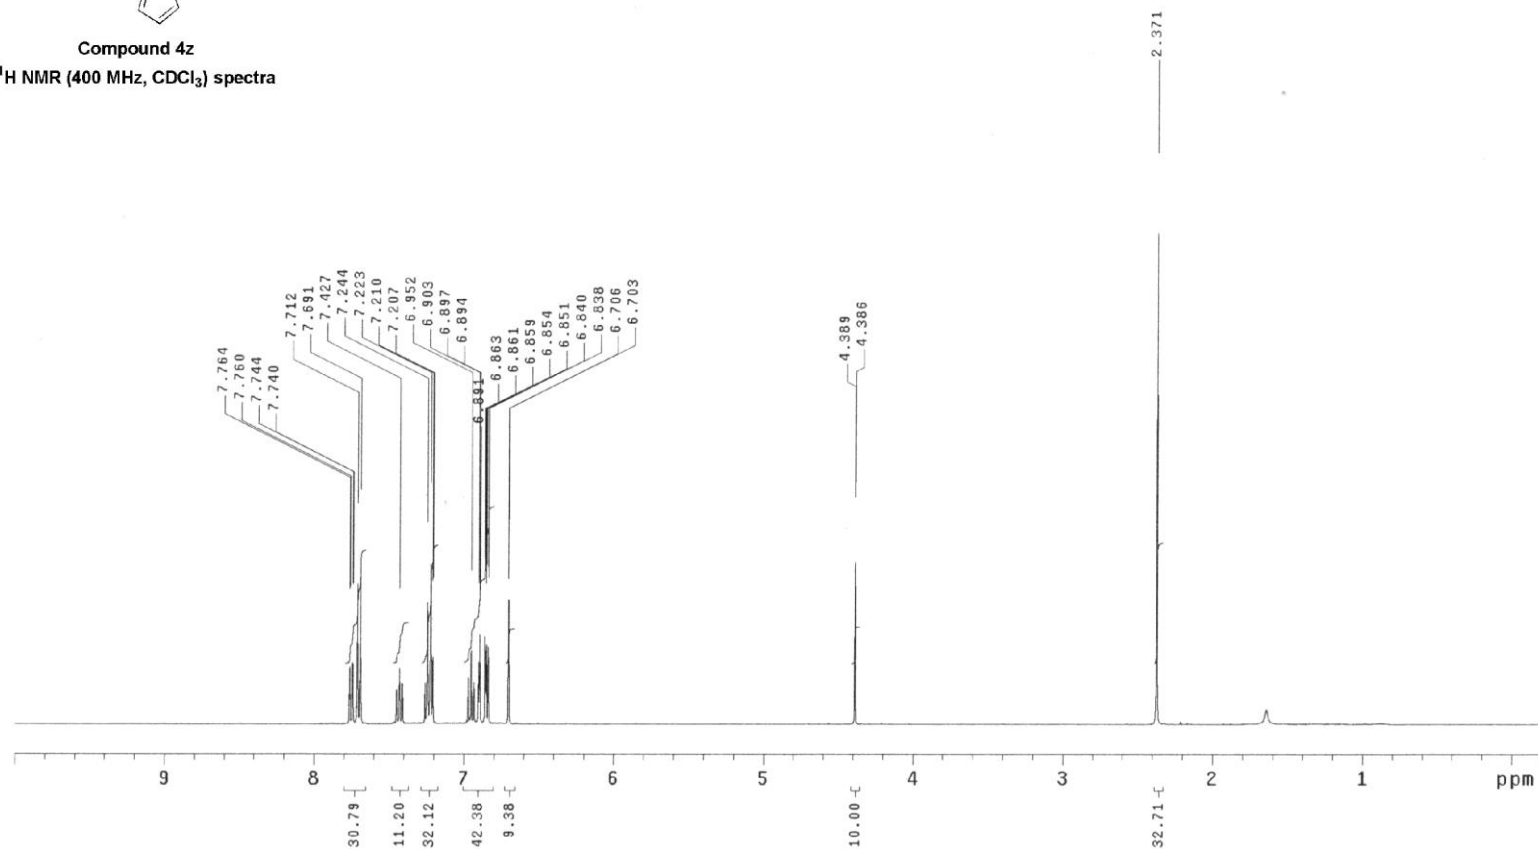

# Compound 4z (<sup>13</sup>C-NMR spectral data)

HAK1A13

Pulse Sequence: s2pu1

UNITYplus-400, "unity400"

Date: Jan 9 2018

Solvent: CDCl<sub>3</sub>

Ambient temperature

Total 576 repetitions

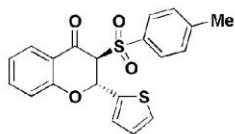

Compound 4z

<sup>13</sup>C NMR (100 MHz, CDCl<sub>3</sub>) spectra

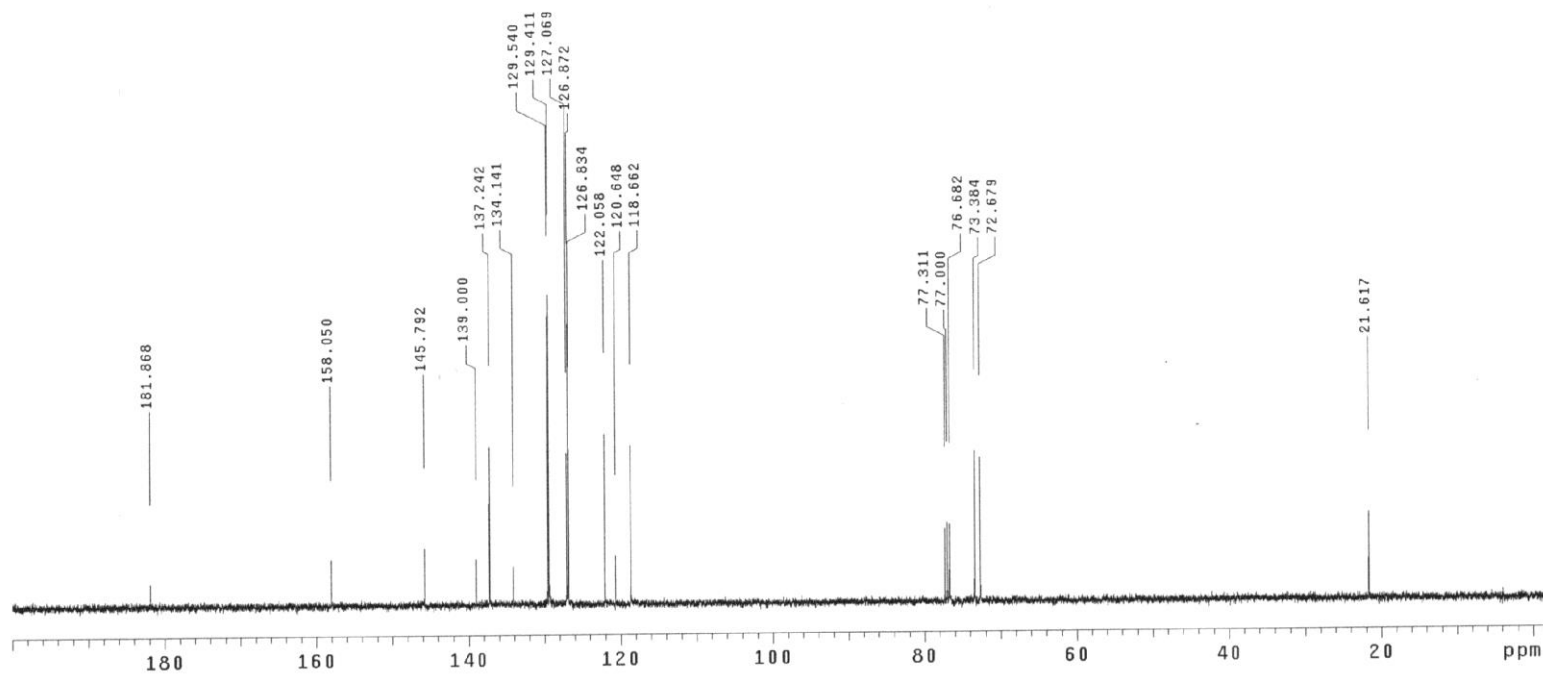

# Compound 4aa (<sup>1</sup>H-NMR spectral data)

HAK1A14

Pulse Sequence: s2pu1

UNITYplus-400 "unity400"

Date: Jan 18 2018

Solvent: CDCl<sub>3</sub>

Ambient temperature

Total 32 repetitions

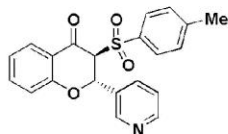

Compound 4aa

<sup>1</sup>H NMR (400 MHz, CDCl<sub>3</sub>) spectra

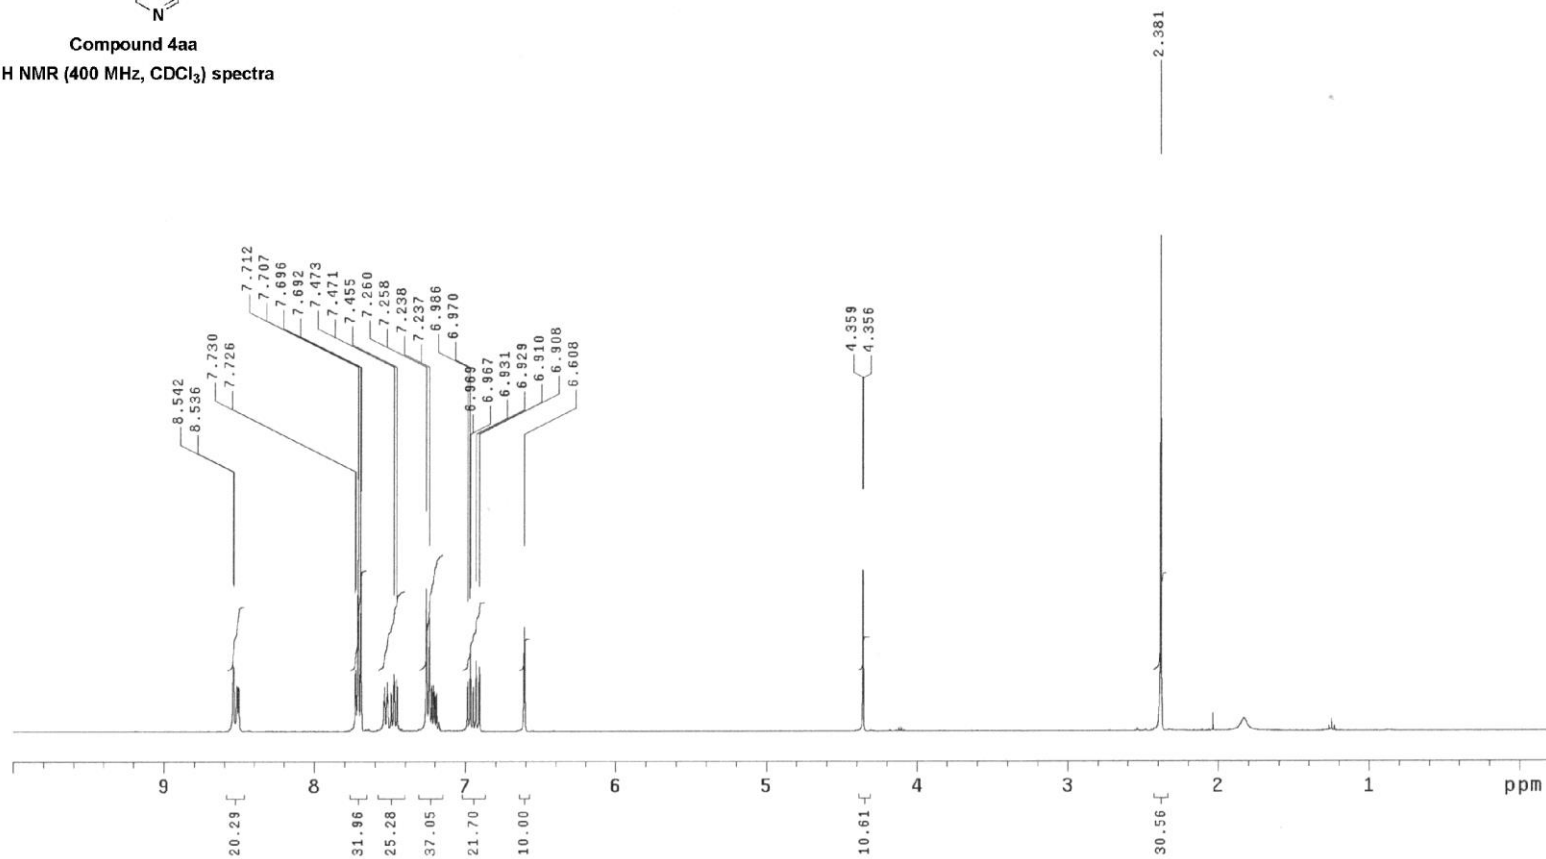

# Compound 4aa (<sup>13</sup>C-NMR spectral data)

HAK1A14

Pulse Sequence: s2pu1

UNITYplus-400 "unity400"

Date: Jan 18 2018

Solvent: CDCl<sub>3</sub>

Ambient temperature

Total 880 repetitions

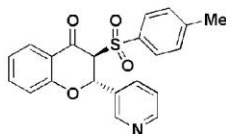

Compound 4aa

<sup>13</sup>C NMR (100 MHz, CDCl<sub>3</sub>) spectra

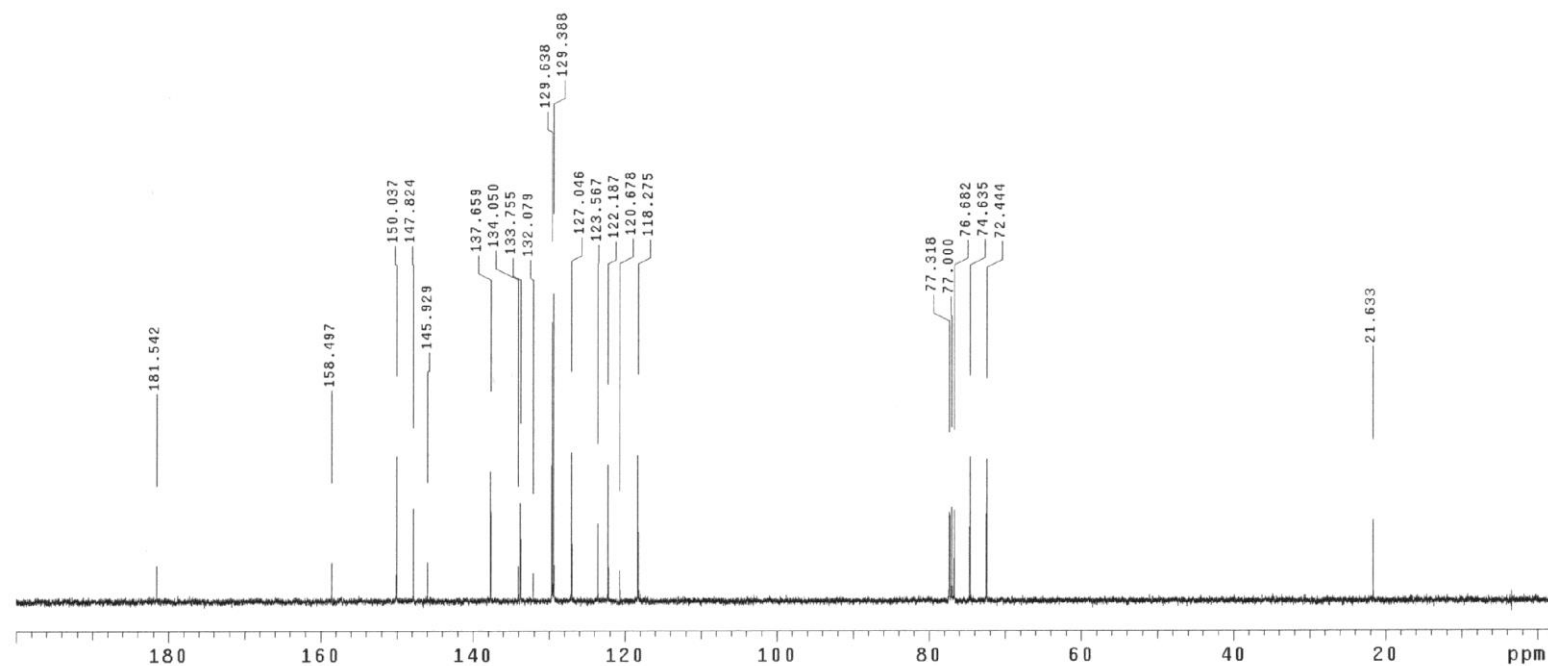

# Compound 4ab (<sup>1</sup>H-NMR spectral data)

YTDS1

Pulse Sequence: s2pu1  
UNITYplus-400 "unity400"  
Date: Dec 4 2017  
Solvent: CDCl<sub>3</sub>  
Ambient temperature  
Total 32 repetitions

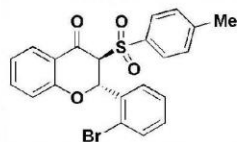

Compound 4ab

<sup>1</sup>H NMR (400 MHz, CDCl<sub>3</sub>) spectra

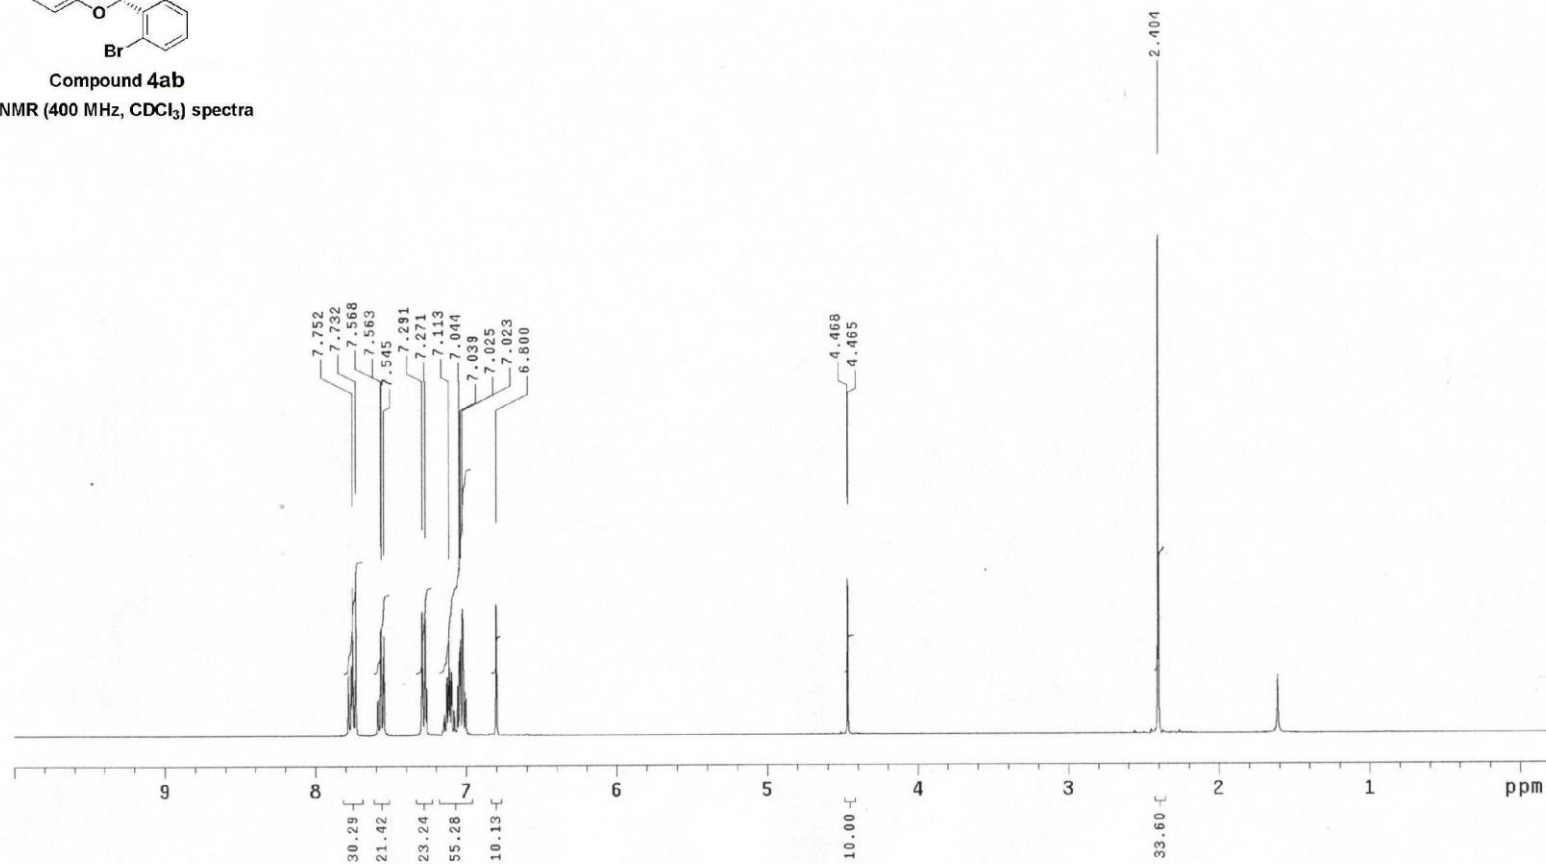



# Compound 4ab ( $^{13}\text{C}$ -NMR spectral data)

YTDS1

Pulse Sequence: s2pu1  
UNITYplus-400 "unity400"  
Date: Dec 4 2017  
Solvent: CDCl<sub>3</sub>  
Ambient temperature  
Total 880 repetitions

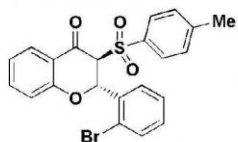

Compound 4ab

$^{13}\text{C}$  NMR (100 MHz, CDCl<sub>3</sub>) spectra

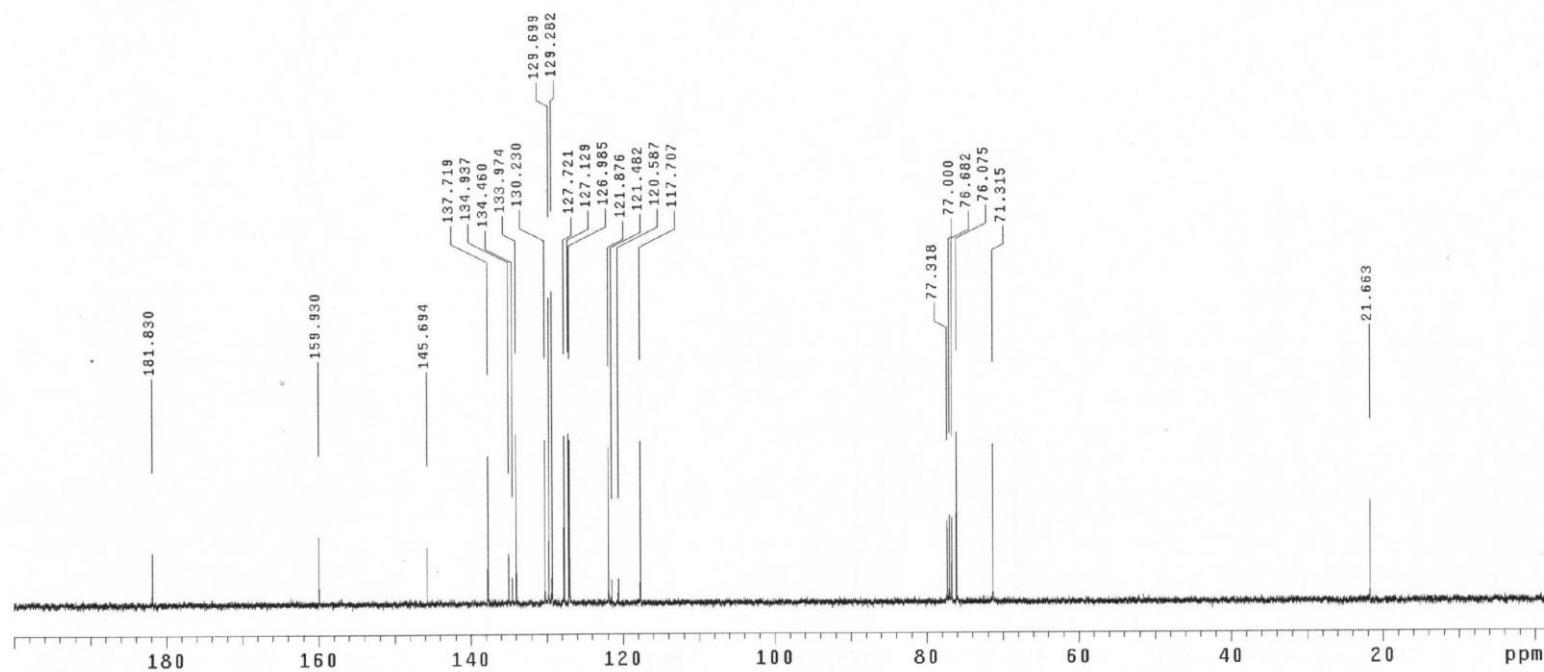

# Compound 4ac (<sup>1</sup>H-NMR spectral data)

HAK21A12

Pulse Sequence: s2pu1

UNITYplus-400 "unity400"

Date: Jan 11 2018

Solvent: CDCl<sub>3</sub>

Ambient temperature

Total 32 repetitions

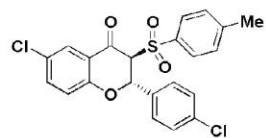

Compound 4ac

<sup>1</sup>H NMR (400 MHz, CDCl<sub>3</sub>) spectra

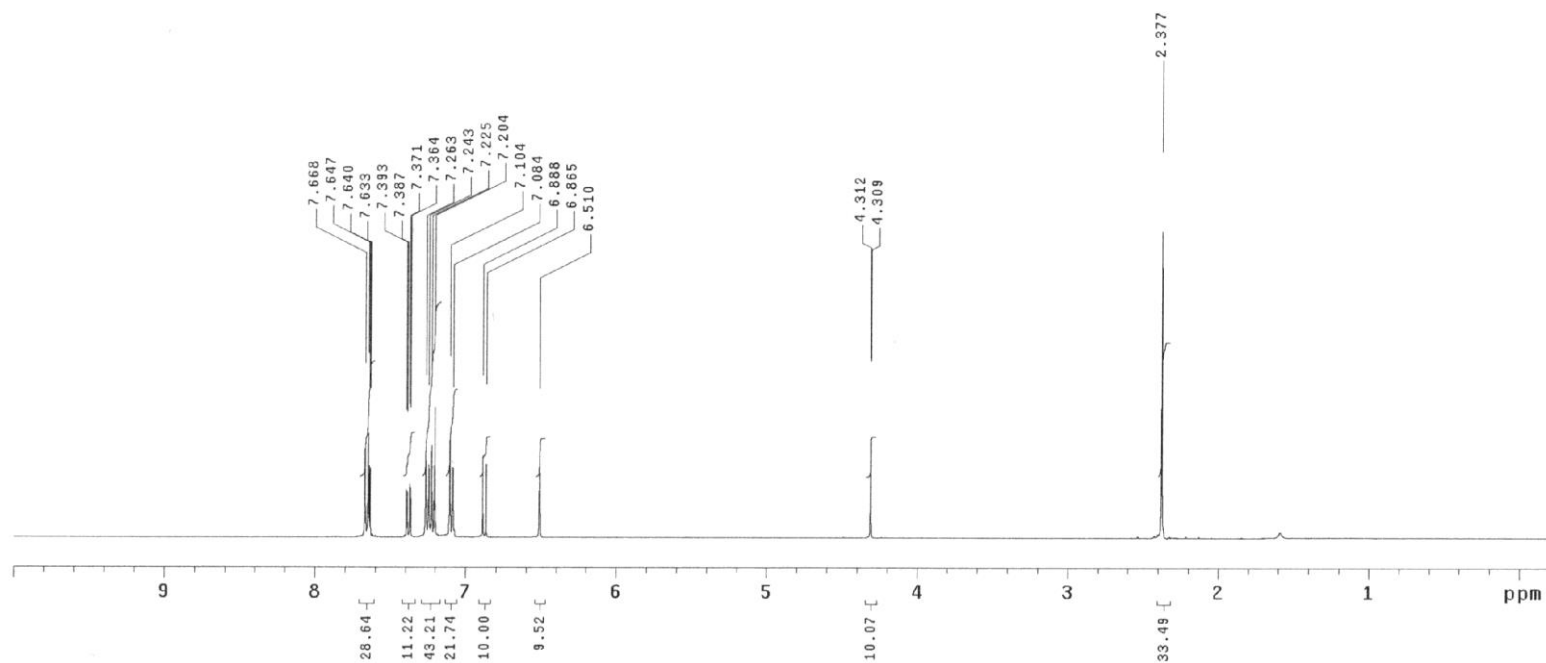

# Compound 4ac ( $^{13}\text{C}$ -NMR spectral data)

HAK21A12

Pulse Sequence: s2pu1

UNITYplus-400 "unity400"

Date: Jan 11 2018

Solvent:  $\text{CDCl}_3$

Ambient temperature

Total 752 repetitions

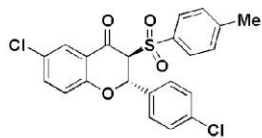

Compound 4ac

$^{13}\text{C}$  NMR (100 MHz,  $\text{CDCl}_3$ ) spectra

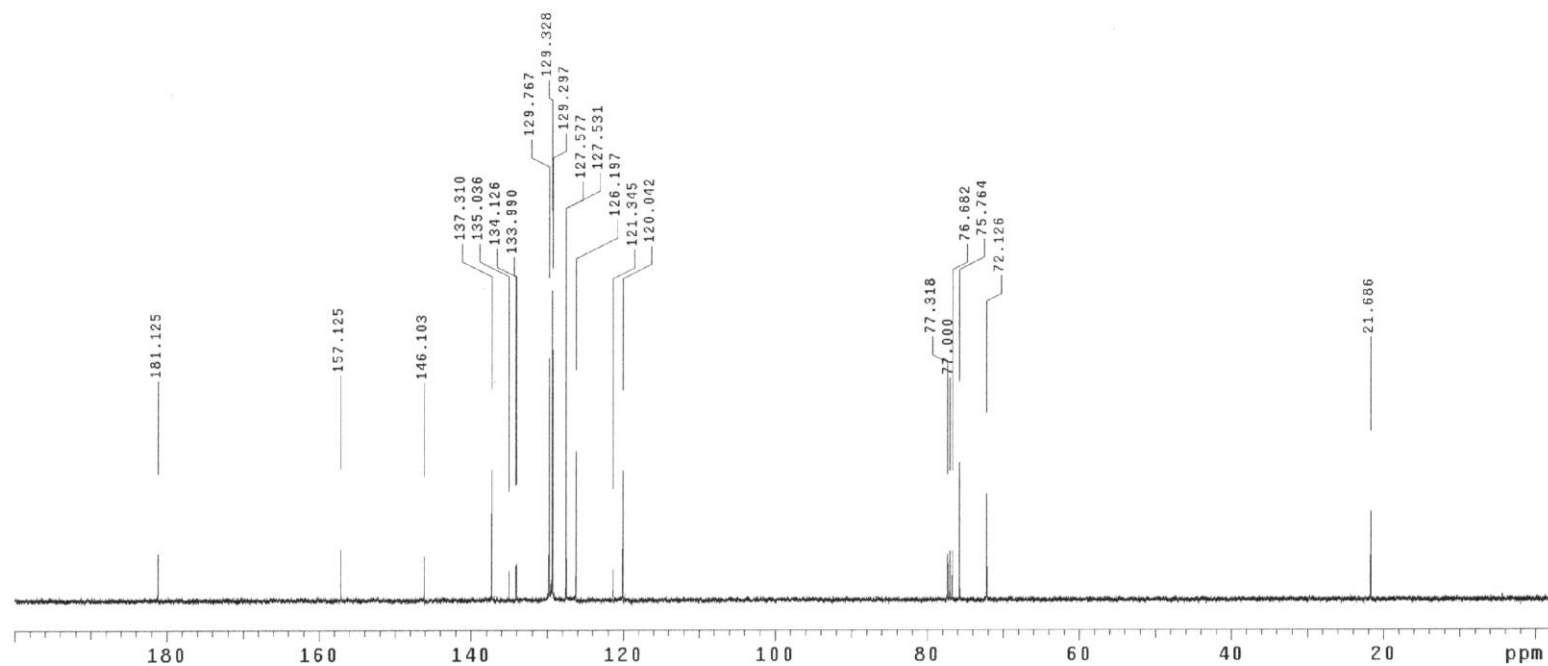

# Compound 4ad (<sup>1</sup>H-NMR spectral data)

HAK7A11

Pulse Sequence: s2pu1

UNITYplus-400 "unity400"

Date: Feb 5 2018

Solvent: CDCl<sub>3</sub>

Ambient temperature

Total 32 repetitions

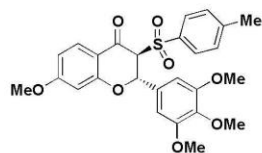

Compound 4ad

<sup>1</sup>H NMR (400 MHz, CDCl<sub>3</sub>) spectra

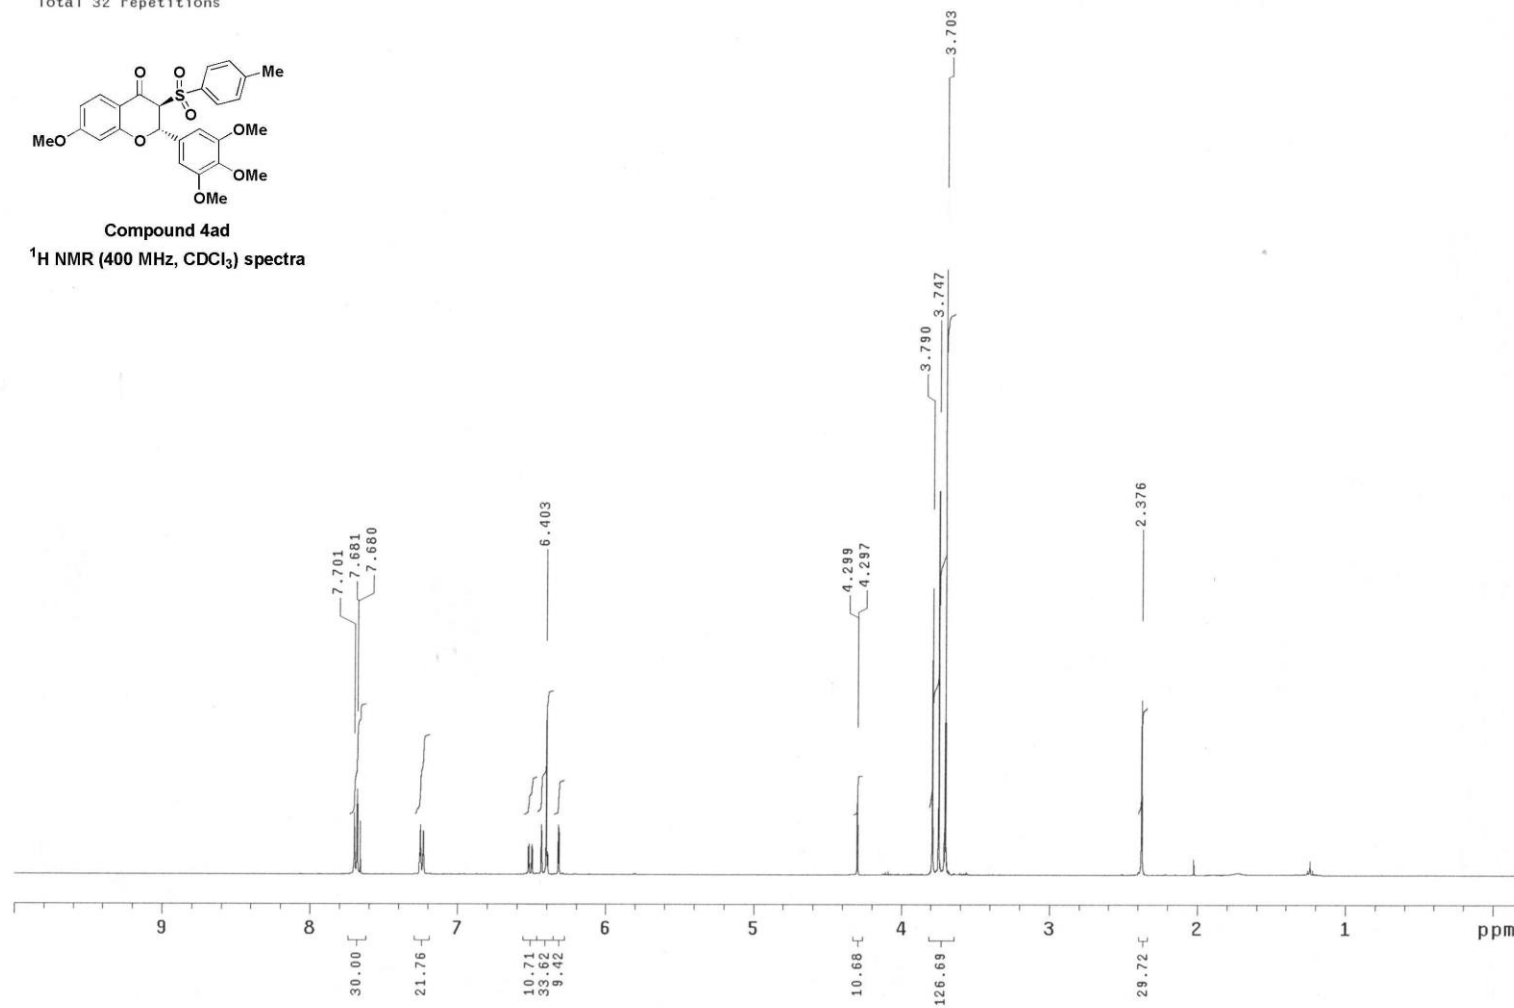

# Compound 4ad ( $^{13}\text{C}$ -NMR spectral data)

HAK7A11

Pulse Sequence: s2pu1  
UNITYplus-400 "unity400"  
Date: Feb 5 2018  
Solvent:  $\text{CDCl}_3$   
Ambient temperature  
Total 1136 repetitions

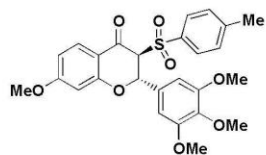

Compound 4ad

$^{13}\text{C}$  NMR (100 MHz,  $\text{CDCl}_3$ ) spectra

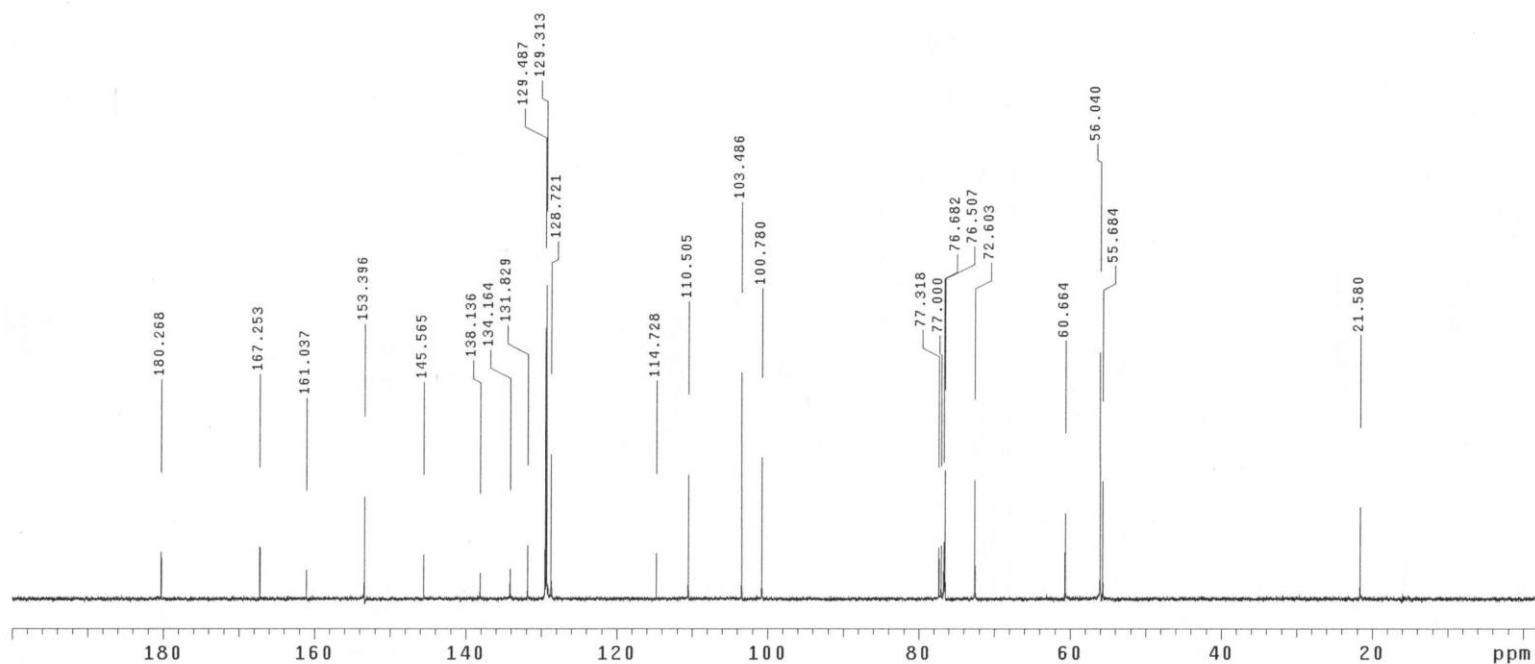

# Compound 4ae (<sup>1</sup>H-NMR spectral data)

YLMsCF3

Pulse Sequence: s2pu1

UNITYplus-400 "unity400"

Date: Jun 5 2017

Solvent: CDCl<sub>3</sub>

Ambient temperature

Total 32 repetitions

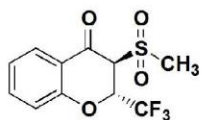

Compound 4ae

<sup>13</sup>C NMR (100 MHz, CDCl<sub>3</sub>) spectra

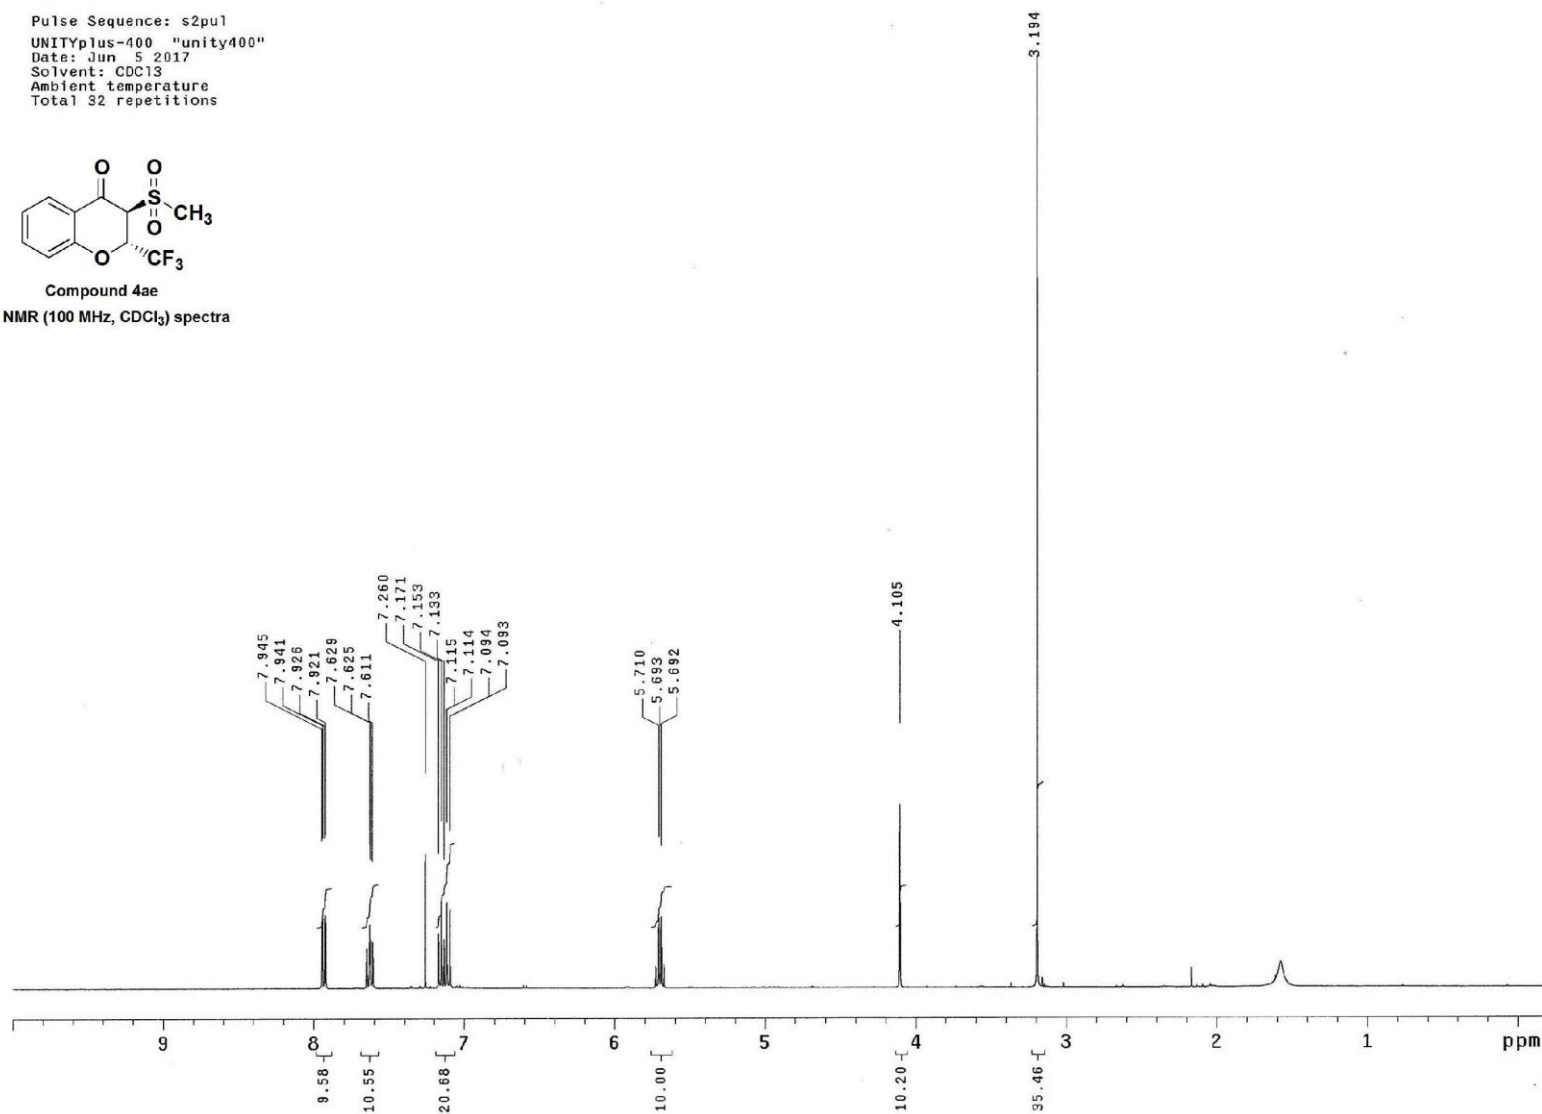

# Compound 4ae (<sup>13</sup>C-NMR spectral data)

YLMsCF3

Pulse Sequence: s2pu1  
UNITYplus-400 "unity400"  
Date: Jun 5 2017  
Solvent: CDCl<sub>3</sub>  
Ambient temperature  
Total 17168 repetitions

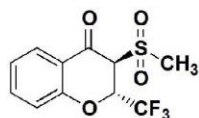

Compound 4ae

<sup>1</sup>H NMR (400 MHz, CDCl<sub>3</sub>) spectra

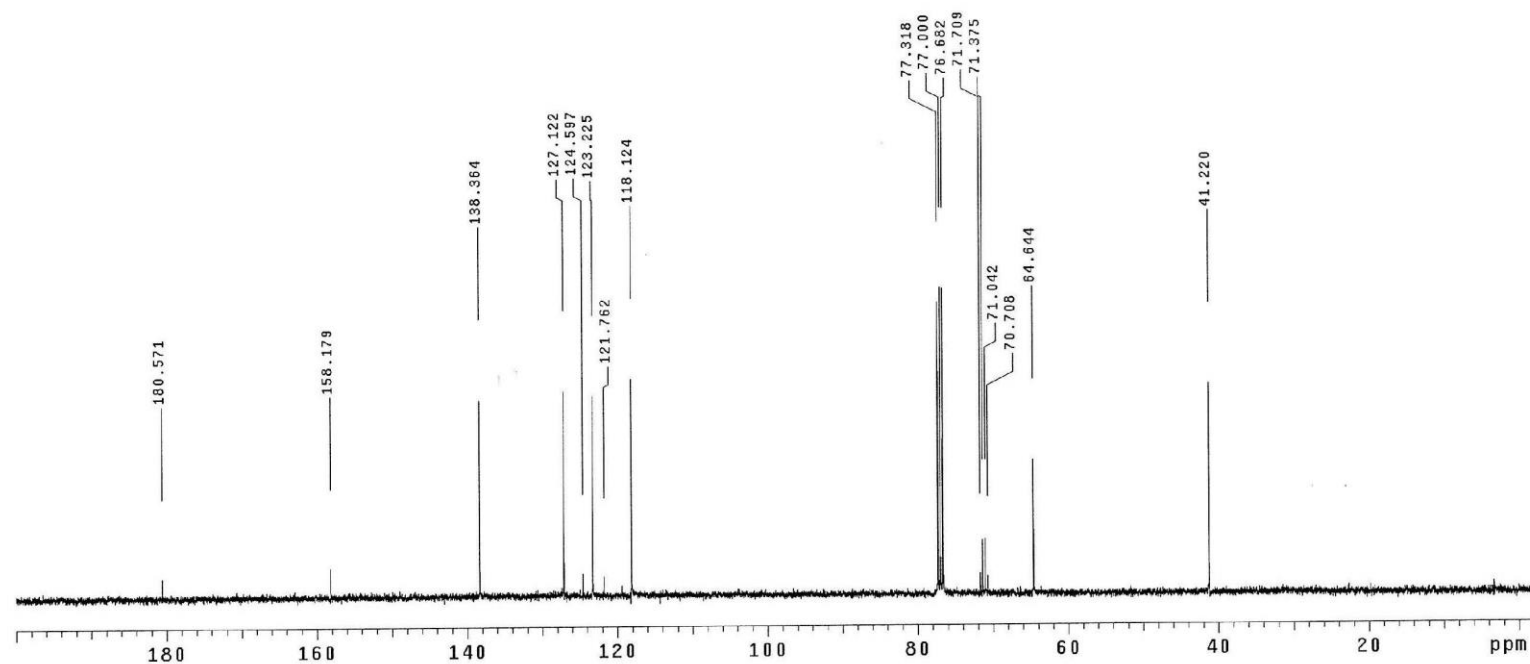

# Compound 4af (<sup>1</sup>H-NMR spectral data)

YLBSCF3

Pulse Sequence: s2pu1

UNITYplus-400 "unity400"

Date: Apr 25 2017

Solvent: CDCl<sub>3</sub>

Ambient temperature

Total 32 repetitions

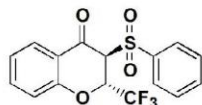

Compound 4af

<sup>1</sup>H NMR (400 MHz, CDCl<sub>3</sub>) spectra

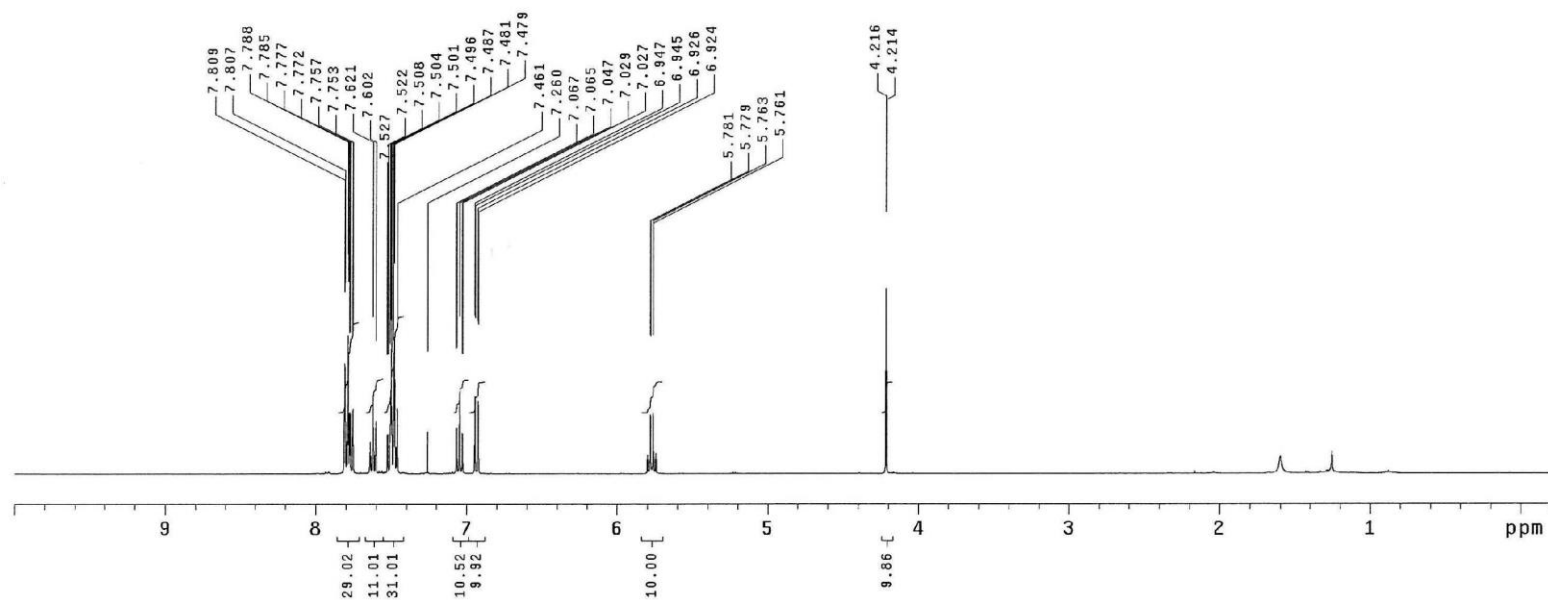



# Compound 4af (<sup>13</sup>C-NMR spectral data)

YLBSCF3

Pulse Sequence: s2pu1

UNITYplus-400 "unity400"

Date: Apr 25 2017

Solvent: CDCl<sub>3</sub>

Ambient temperature

Total 1696 repetitions

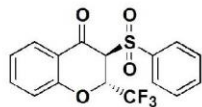

Compound 4af

<sup>13</sup>C NMR (100 MHz, CDCl<sub>3</sub>) spectra

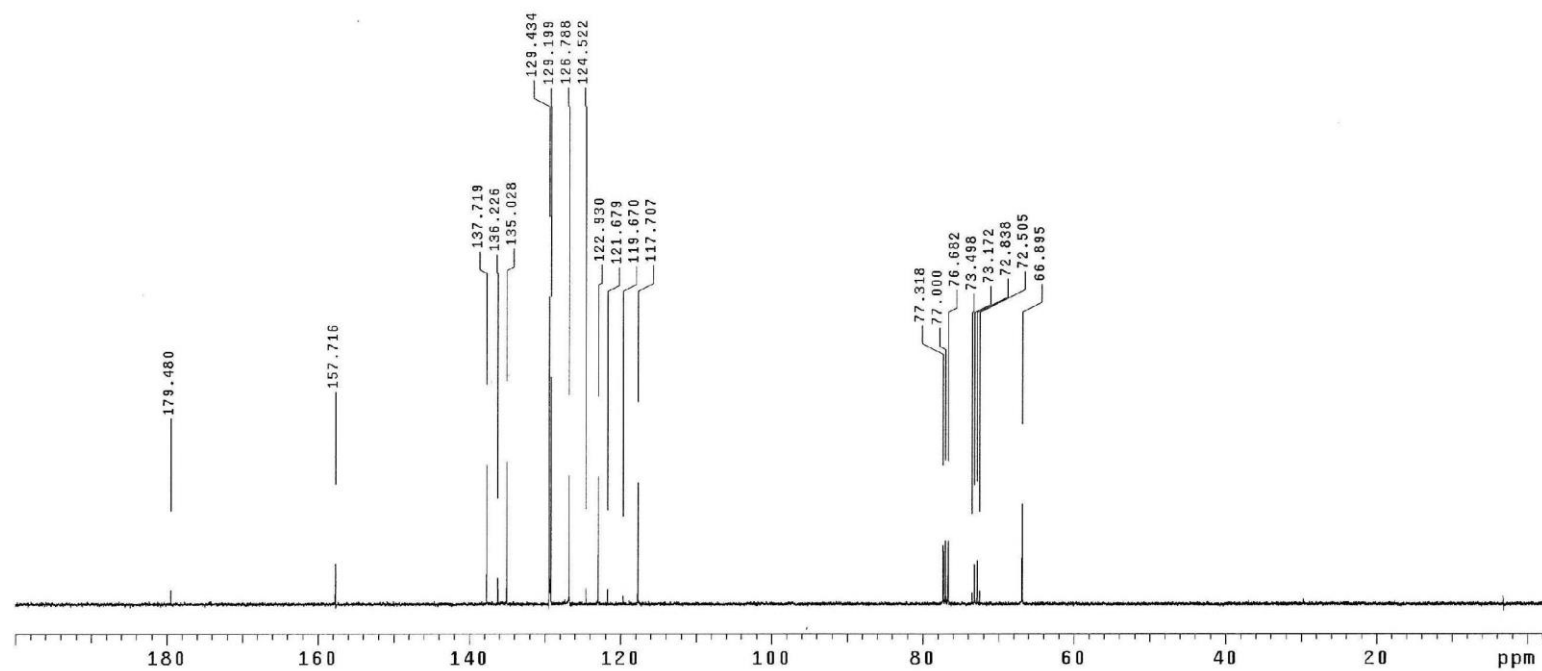

# Compound 4ag (<sup>1</sup>H-NMR spectral data)

YLTsCF3

Pulse Sequence: s2pu1

UNITYplus-400 "unity400"

Date: May 4 2017

Solvent: CDCl<sub>3</sub>

Ambient temperature

Total 32 repetitions

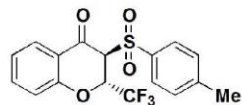

Compound 4ag

<sup>1</sup>H NMR (400 MHz, CDCl<sub>3</sub>) spectra

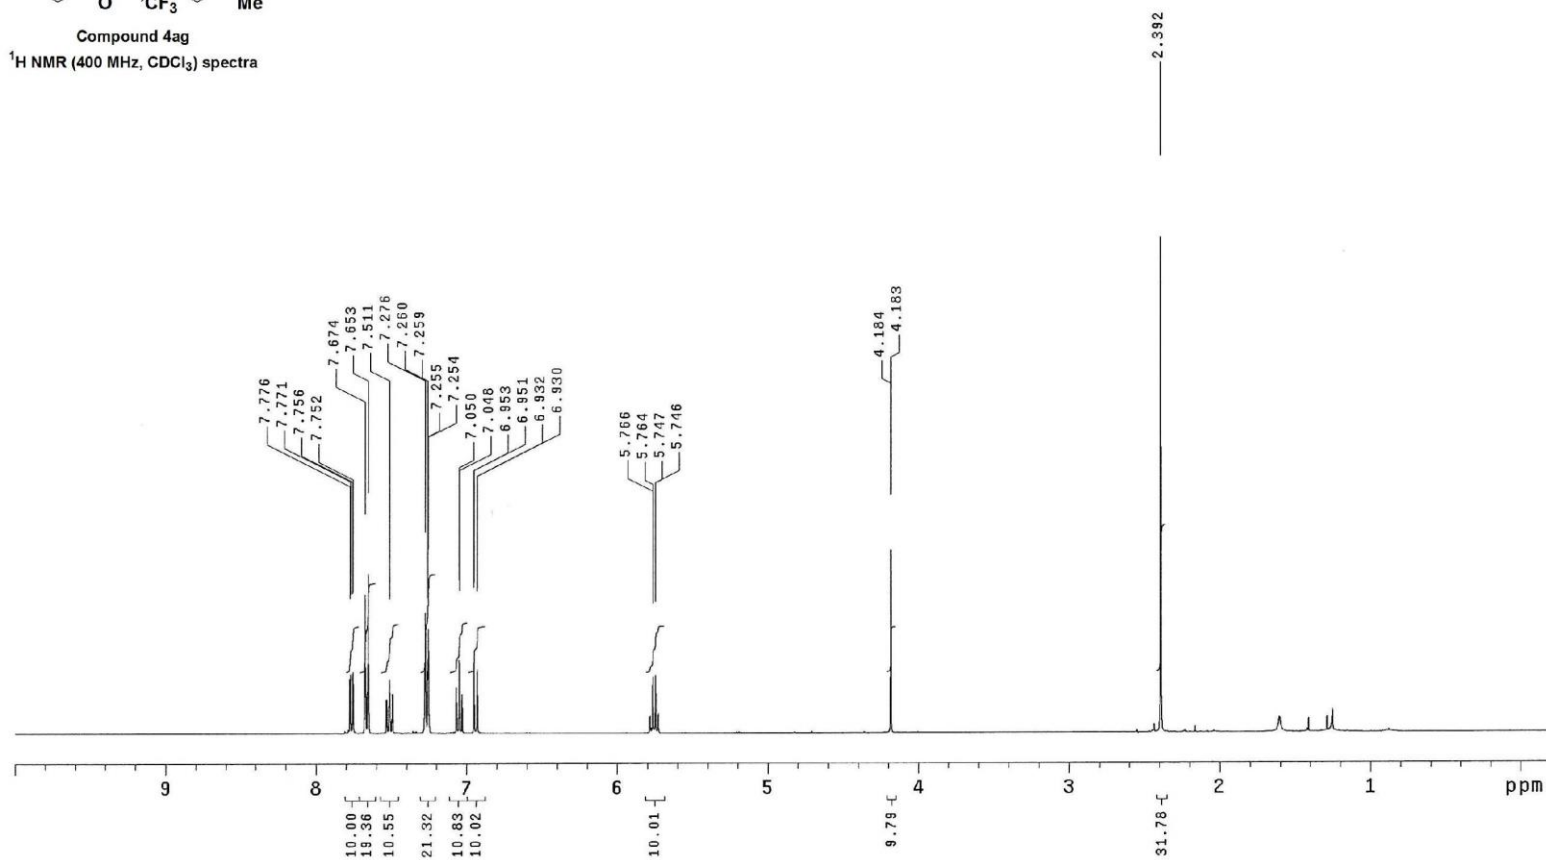

# Compound 4ag (<sup>13</sup>C-NMR spectral data)

YLTsCF3

Pulse Sequence: s2pu1

UNITYplus-400 "unity400"

Date: May 4 2017

Solvent: CDCl<sub>3</sub>

Ambient temperature

Total 2032 repetitions

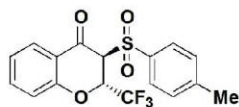

Compound 4ag

<sup>13</sup>C NMR (100 MHz, CDCl<sub>3</sub>) spectra

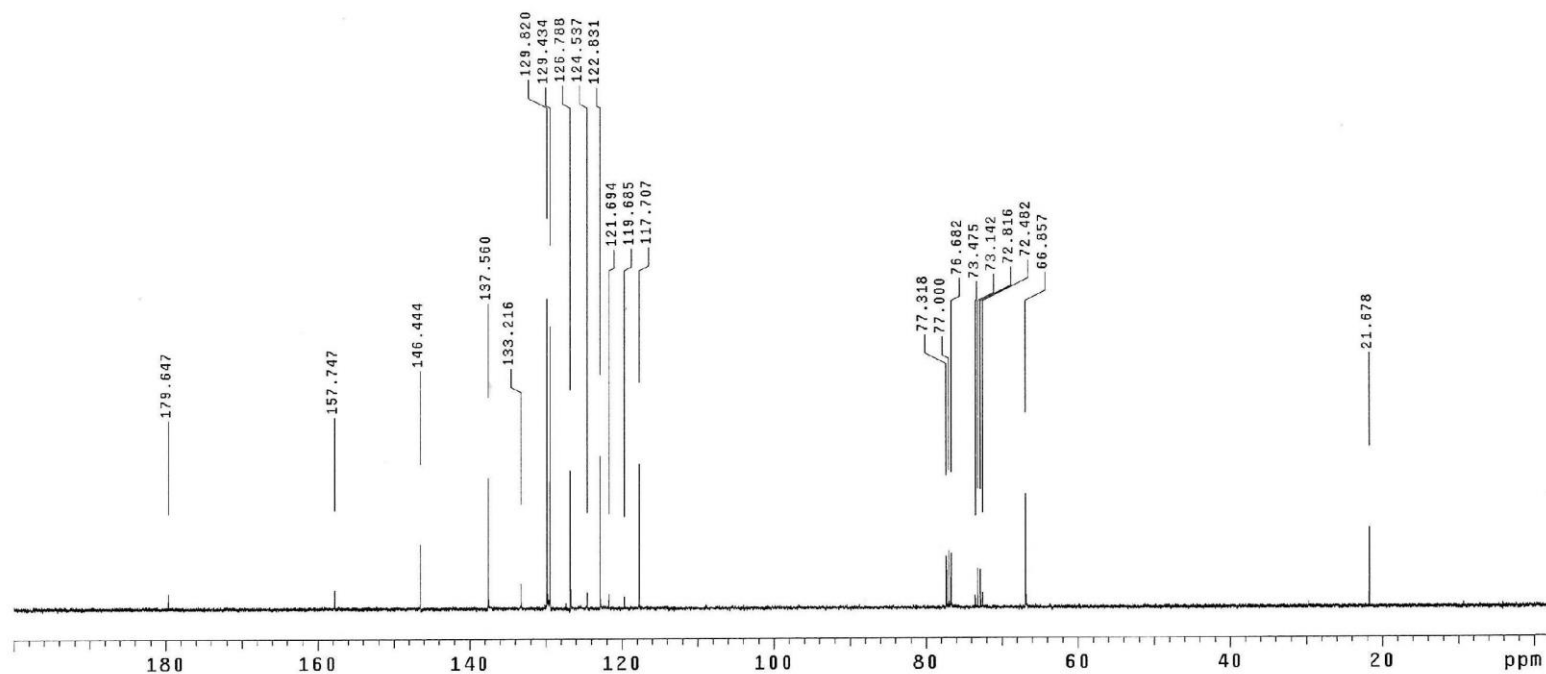

# Compound 4ah (<sup>1</sup>H-NMR spectral data)

YEFCF3

Pulse Sequence: s2pu1

UNITYplus-400 "unity400"

Date: Jun 6 2017

Solvent: CDCl<sub>3</sub>

Ambient temperature

Total 64 repetitions

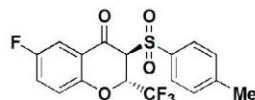

Compound 4ah

<sup>1</sup>H NMR (400 MHz, CDCl<sub>3</sub>) spectra

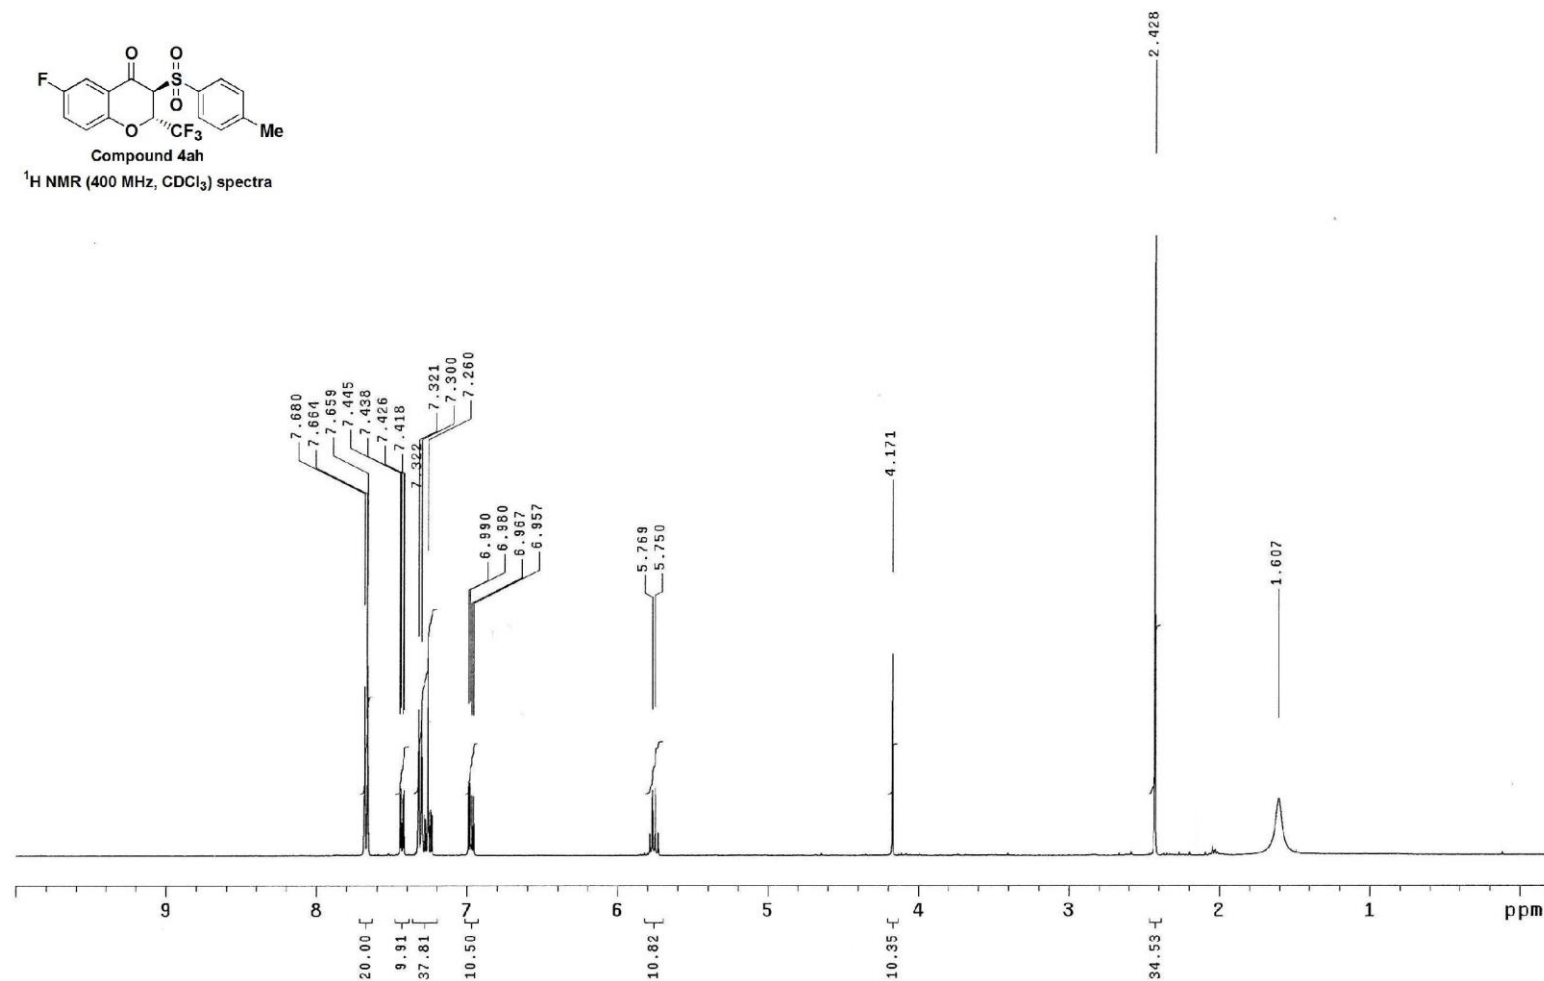

# Compound 4ah (<sup>13</sup>C-NMR spectral data)

YEFCF3

Pulse Sequence: s2pu1

UNITYplus-400 "unity400"

Date: Jun 6 2017

Solvent: CDCl<sub>3</sub>

Ambient temperature

Total 15168 repetitions

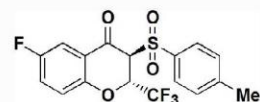

Compound 4ah

<sup>13</sup>C NMR (100 MHz, CDCl<sub>3</sub>) spectra

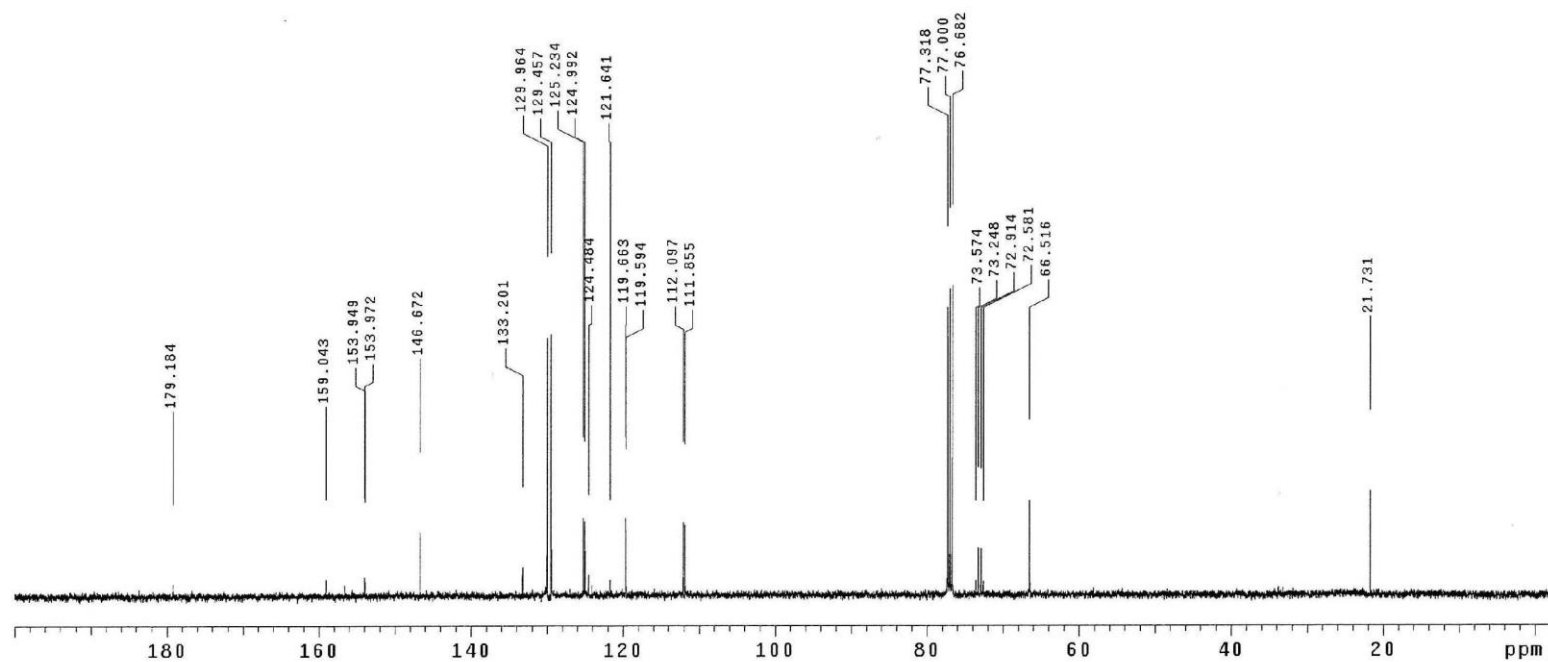

# Compound 4ai (<sup>1</sup>H-NMR spectral data)

YLTs0CF3

Pulse Sequence: s2pu1

UNITYplus-400 "unity400"

Date: Apr 28 2017

Solvent: CDCl<sub>3</sub>

Ambient temperature

Total 32 repetitions

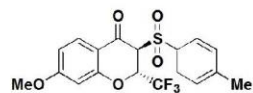

Compound 4ai

<sup>1</sup>H NMR (400 MHz, CDCl<sub>3</sub>) spectra

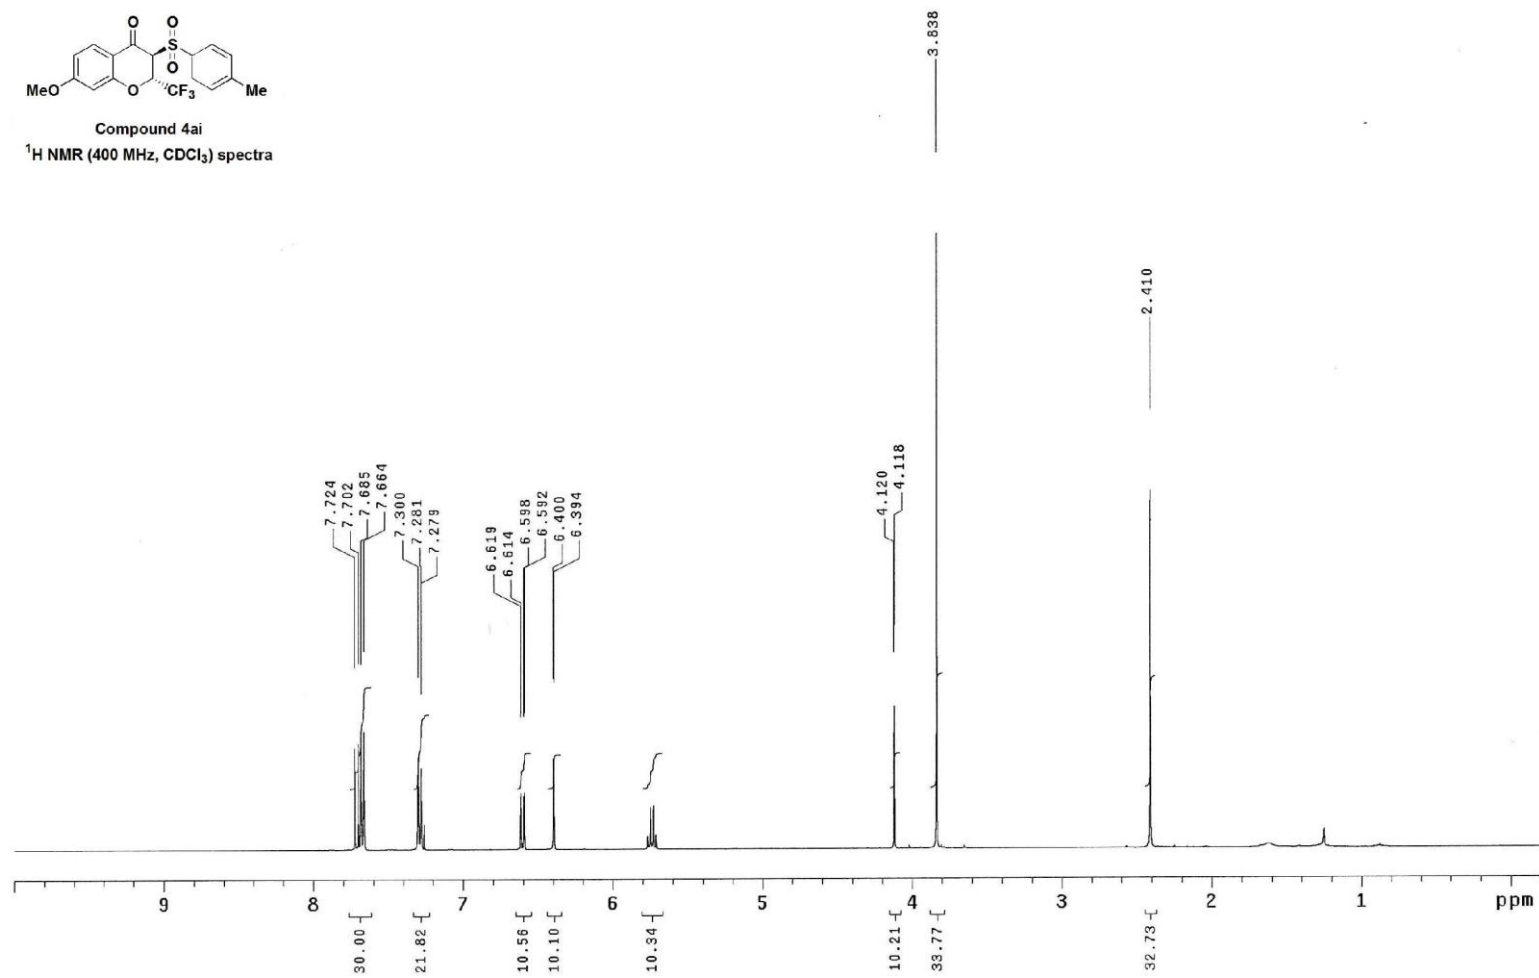

# Compound 4ai (<sup>13</sup>C-NMR spectral data)

YLTsOCF3

Pulse Sequence: s2pul

UNITYplus-400 "unity400"

Date: Apr 28 2017

Solvent: CDCl<sub>3</sub>

Ambient temperature

Total 1040 repetitions

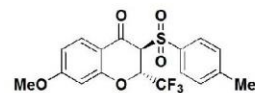

Compound 4ai

<sup>13</sup>C NMR (100 MHz, CDCl<sub>3</sub>) spectra

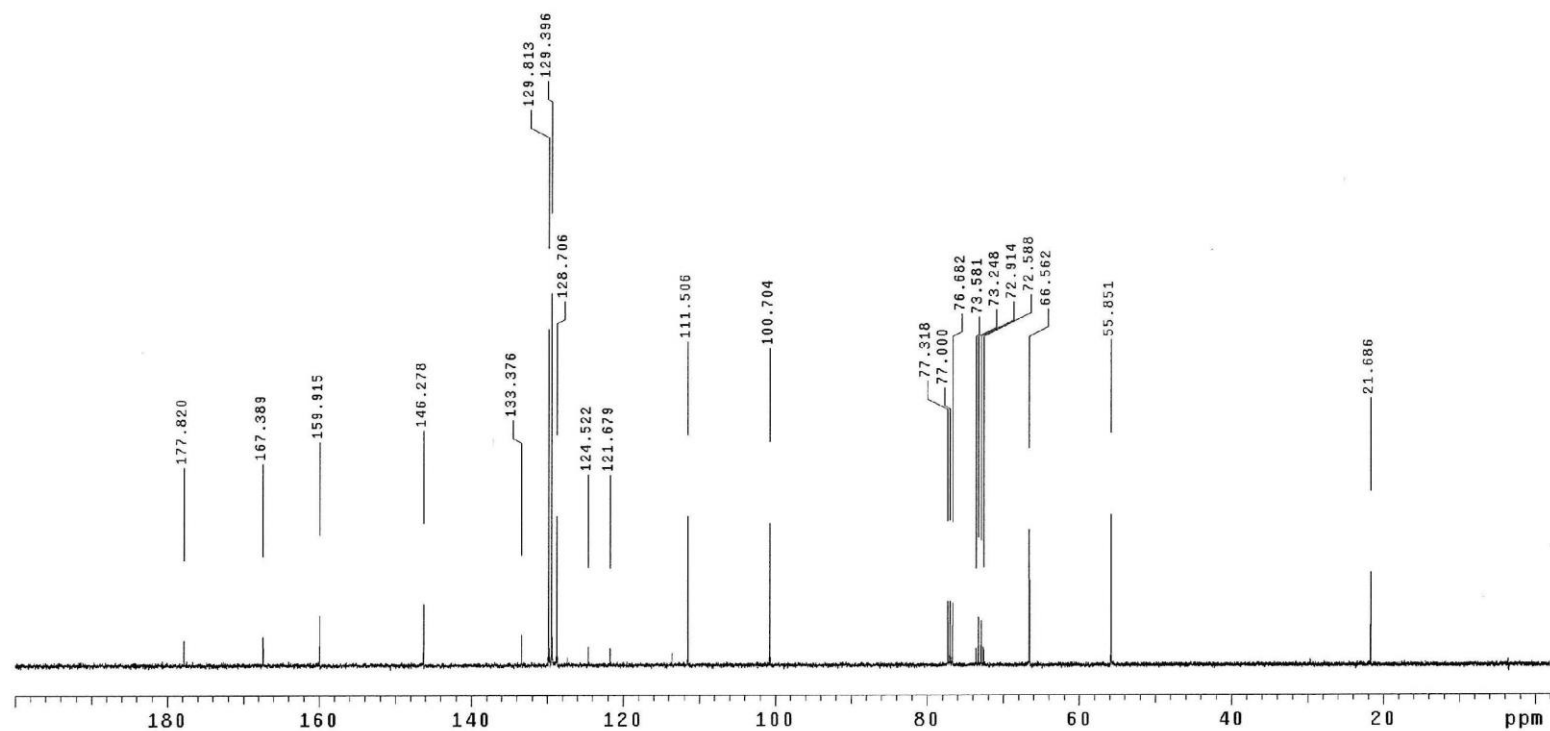

# Compound 4aj (<sup>1</sup>H-NMR spectral data)

YLFCF3

Pulse Sequence: s2pu1  
UNITYplus-400 "unity400"  
Date: Jun 6 2017  
Solvent: CDCl3  
Ambient temperature  
Total 64 repetitions

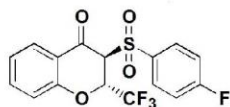

Compound 4aj

<sup>1</sup>H NMR (400 MHz, CDCl<sub>3</sub>) spectra

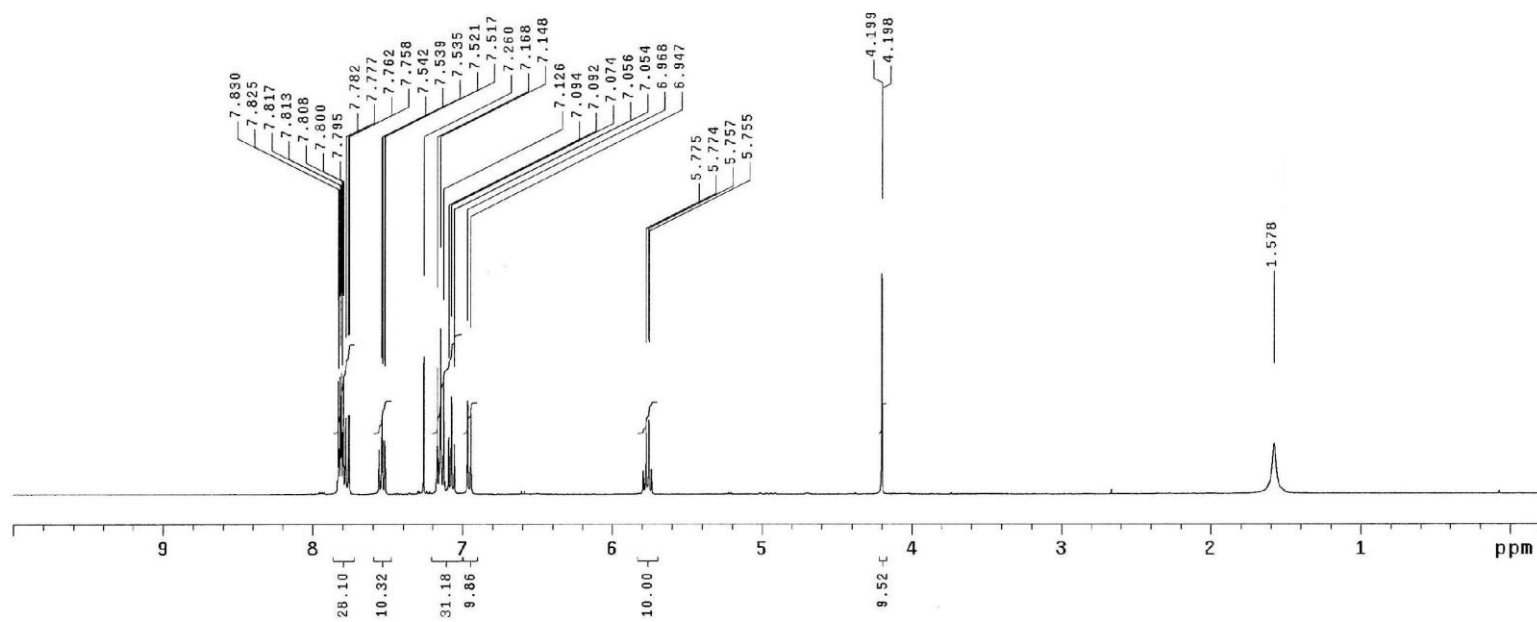



# Compound 4aj (<sup>13</sup>C-NMR spectral data)

YLFCF3

Pulse Sequence: s2pu1

UNITYplus-400 "unity400"

Date: Jun 6 2017

Solvent: CDCl<sub>3</sub>

Ambient temperature

Total 20480 repetitions

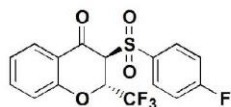

Compound 4aj

<sup>13</sup>C NMR (100 MHz, CDCl<sub>3</sub>) spectra

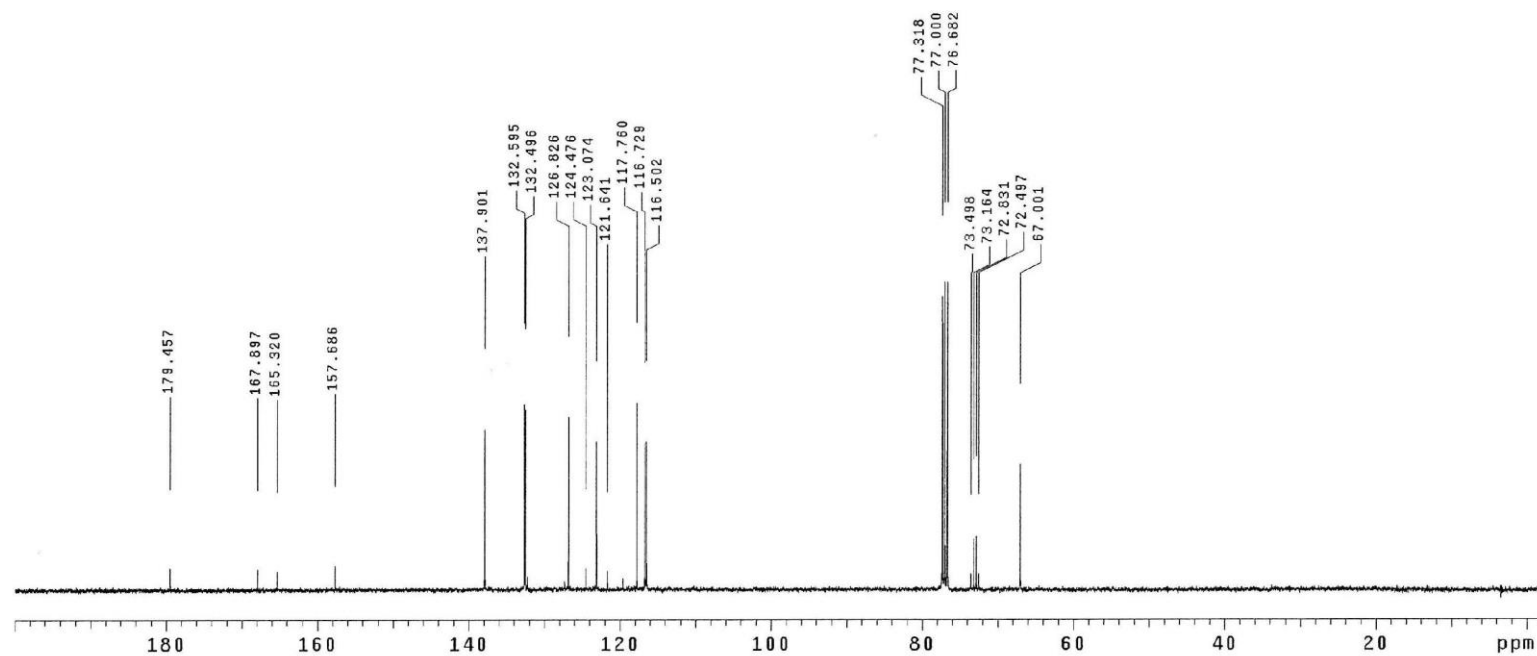

# Compound 4ak (<sup>1</sup>H-NMR spectral data)

YLRTsEt21

Pulse Sequence: s2pul

UNITYplus-400 "unity400"

Date: Nov 28 2017

Solvent: CDCl<sub>3</sub>

Ambient temperature

Total 32 repetitions

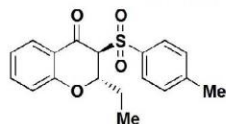

Compound 4ak

<sup>1</sup>H NMR (400 MHz, CDCl<sub>3</sub>) spectra

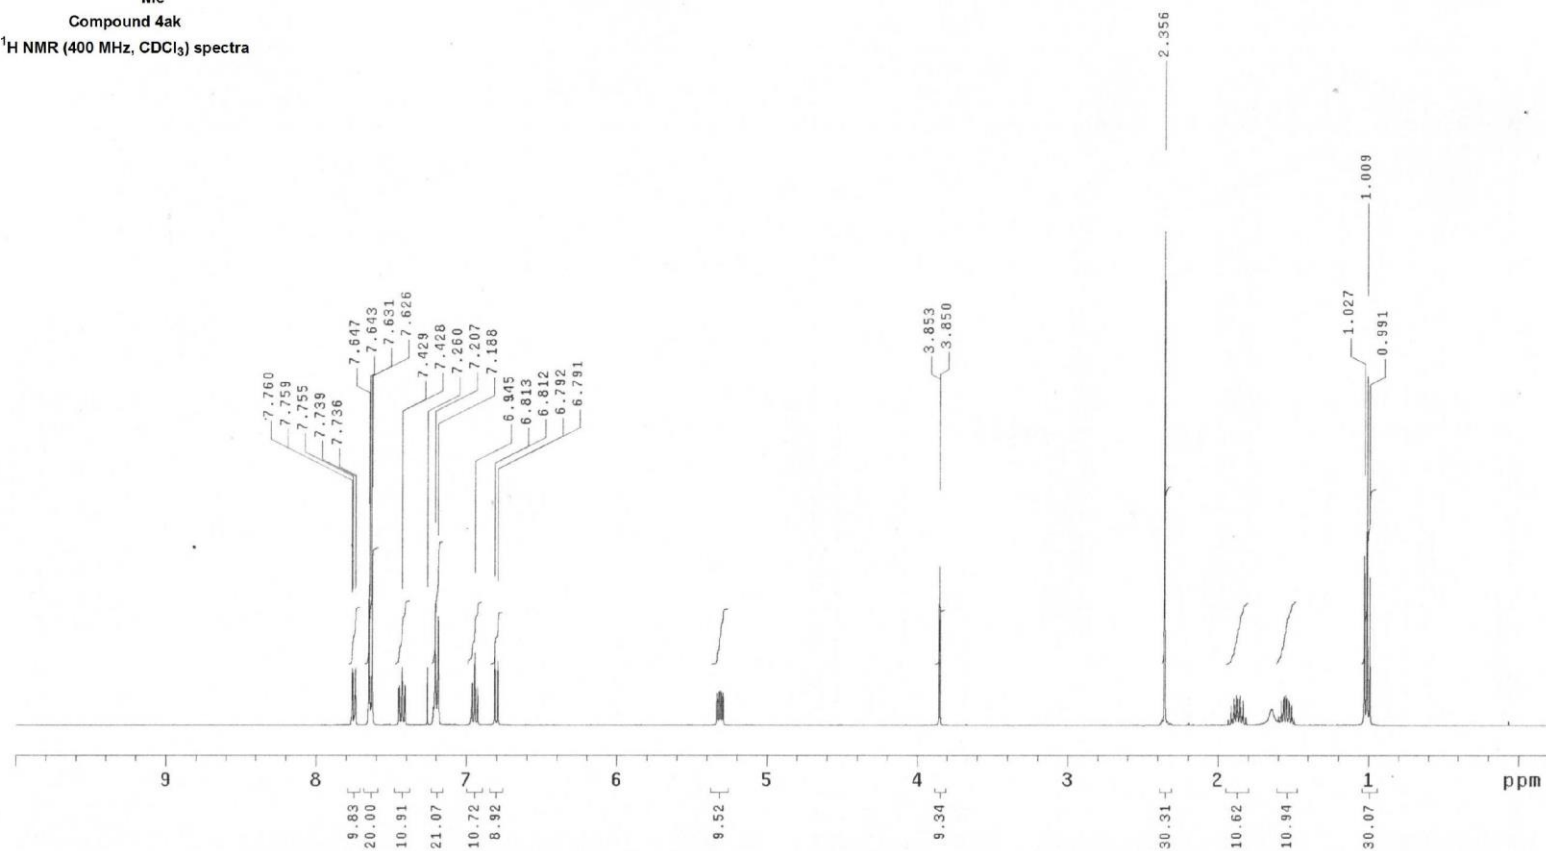

# Compound 4ak ( $^{13}\text{C}$ -NMR spectral data)

YLRTsEt21

Pulse Sequence: s2pu1  
UNITYplus-400 "unity400"  
Date: Nov 28 2017  
Solvent:  $\text{CDCl}_3$   
Ambient temperature  
Total 1728 repetitions

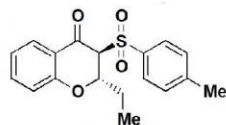

Compound 4ak

$^{13}\text{C}$  NMR (100 MHz,  $\text{CDCl}_3$ ) spectra

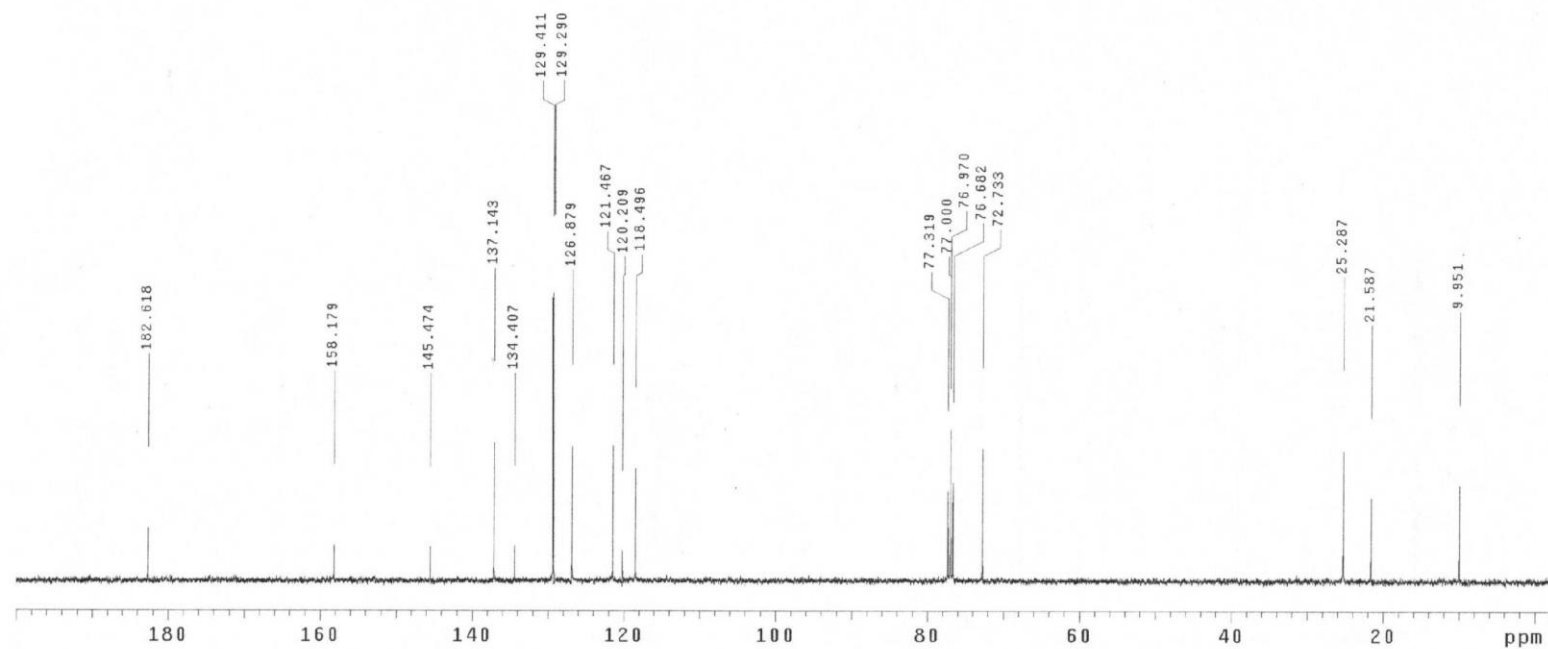

# Compound 4al (<sup>1</sup>H-NMR spectral data)

YLRF33

Pulse Sequence: s2pu1

UNITYplus-400 "unity400"

Date: Jun 14 2017

Solvent: CDCl<sub>3</sub>

Ambient temperature

Total 32 repetitions

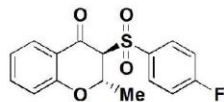

Compound 4al

<sup>1</sup>H NMR (400 MHz, CDCl<sub>3</sub>) spectra

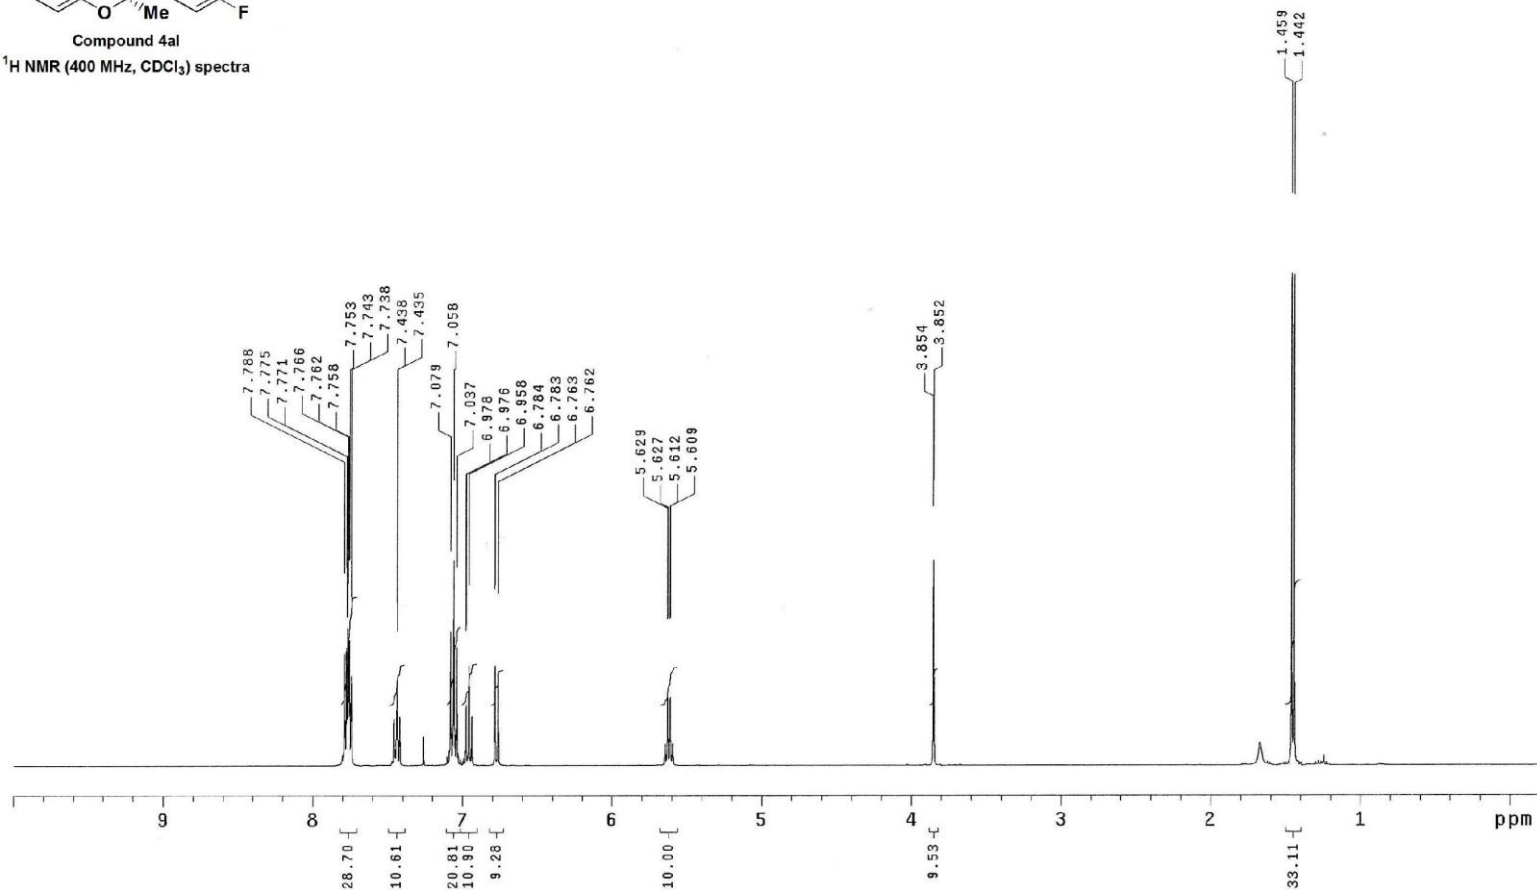

# Compound 4al (<sup>13</sup>C-NMR spectral data)

YLRF33

Pulse Sequence: s2pu1

UNITYplus-400 "unity400"

Date: Jun 14 2017

Solvent: CDCl<sub>3</sub>

Ambient temperature

Total 1248 repetitions

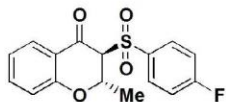

Compound 4al

<sup>13</sup>C NMR (100 MHz, CDCl<sub>3</sub>) spectra

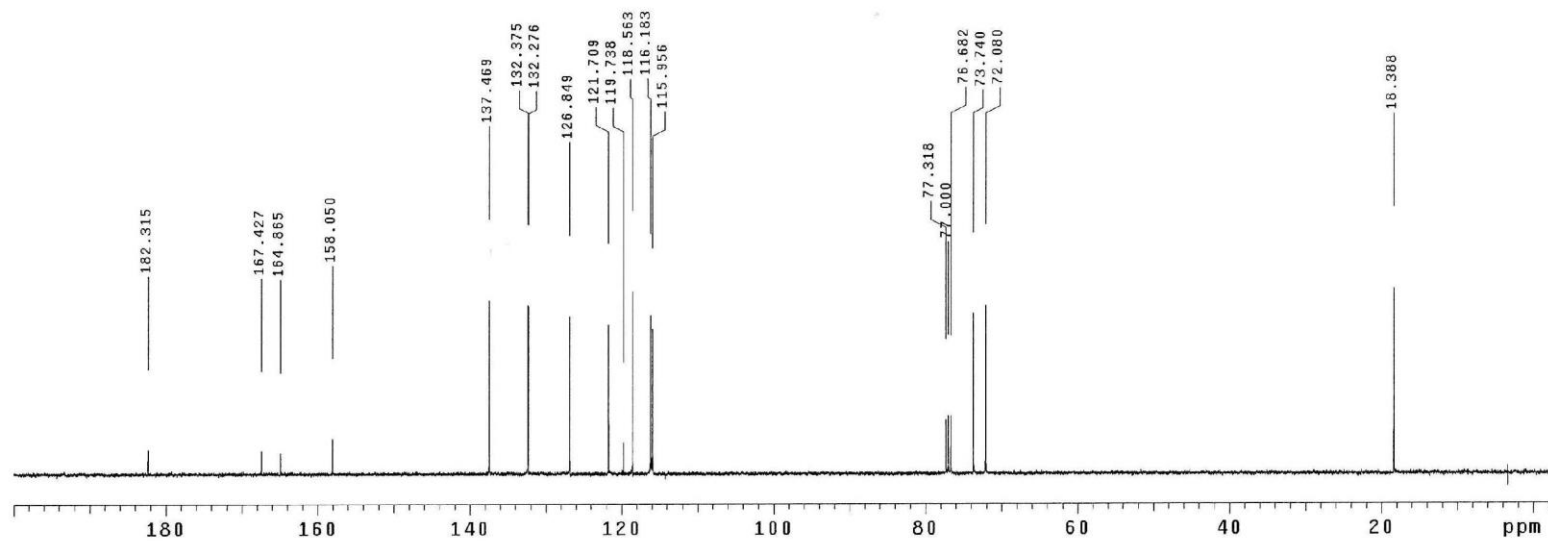

# Compound 4am (<sup>1</sup>H-NMR spectral data)

HAK1A41

Pulse Sequence: s2pu1

UNITYplus-400 "unity400"

Date: Feb 23 2018

Solvent: CDCl<sub>3</sub>

Ambient temperature

Total 32 repetitions

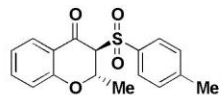

Compound 4am (major)

<sup>1</sup>H NMR (400 MHz, CDCl<sub>3</sub>) spectra

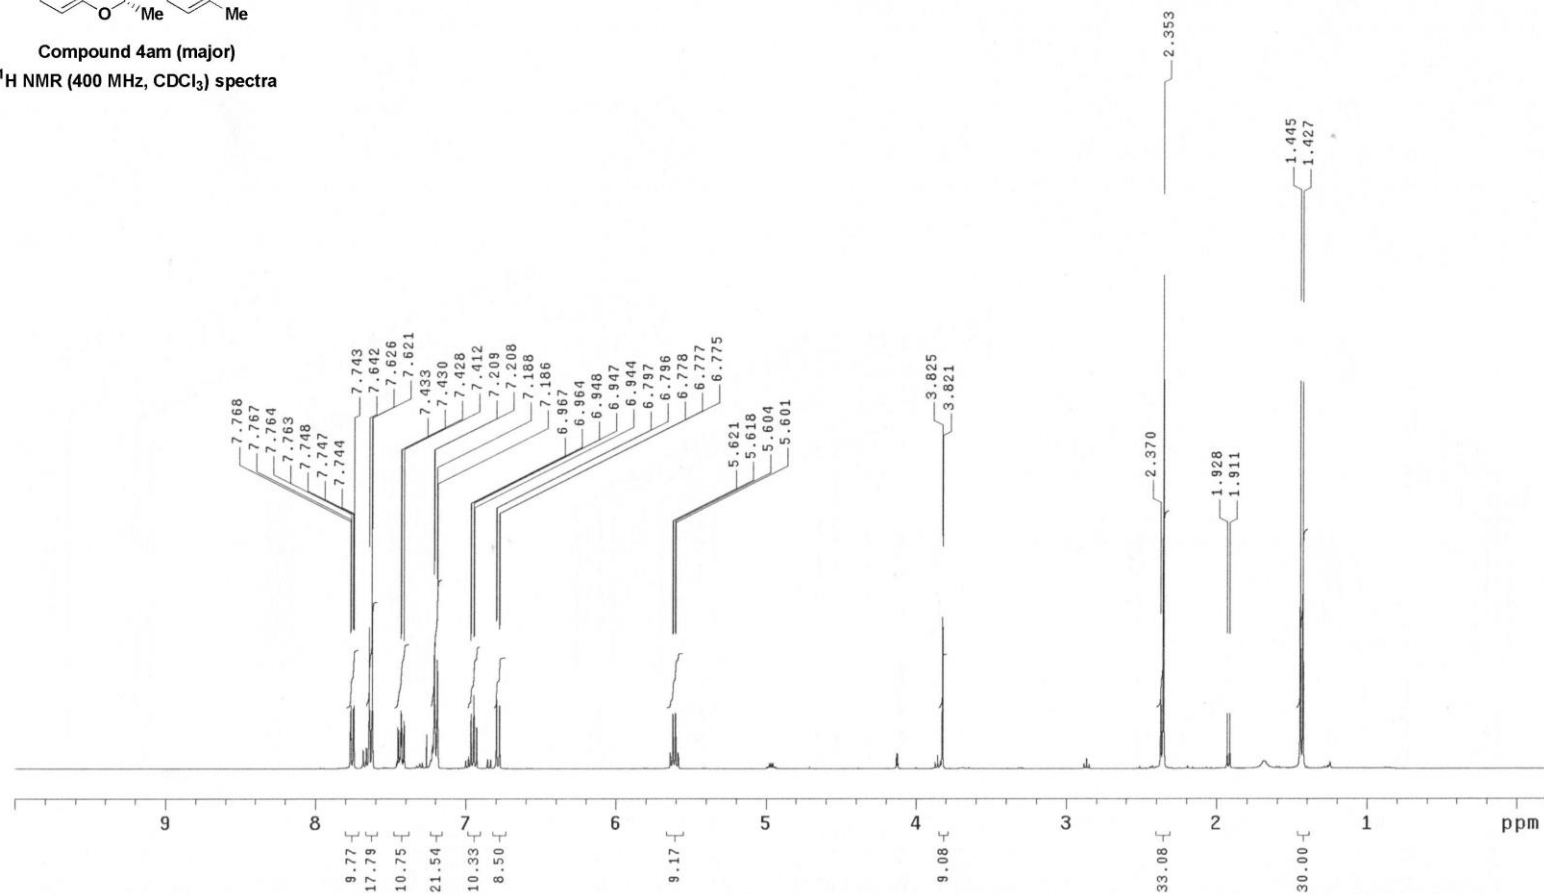

# Compound 4am (<sup>13</sup>C-NMR spectral data)

HAK1A41

Pulse Sequence: s2pu1

UNITYplus-400 "unity400"

Date: Feb 23 2018

Solvent: CDCl<sub>3</sub>

Ambient temperature

Total 320 repetitions

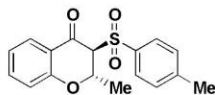

Compound 4am (major)

<sup>13</sup>C NMR (100 MHz, CDCl<sub>3</sub>) spectra

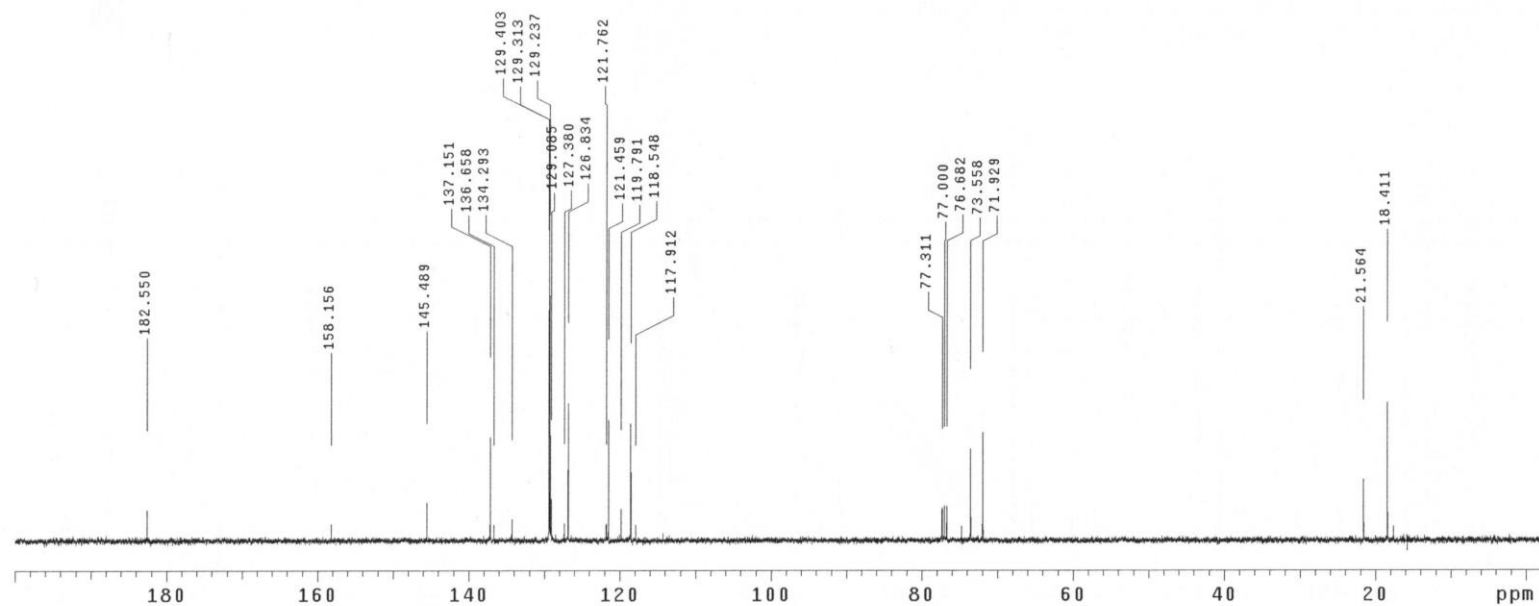

# Compound 4an (<sup>1</sup>H-NMR spectral data)

HAK1A40

Pulse Sequence: s2pu1

UNITYplus-400 "unity400"

Date: Feb 23 2018

Solvent: CDCl<sub>3</sub>

Ambient temperature

Total 32 repetitions

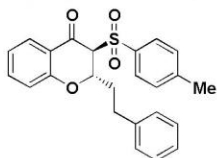

Compound 4an

<sup>1</sup>H NMR (400 MHz, CDCl<sub>3</sub>) spectra

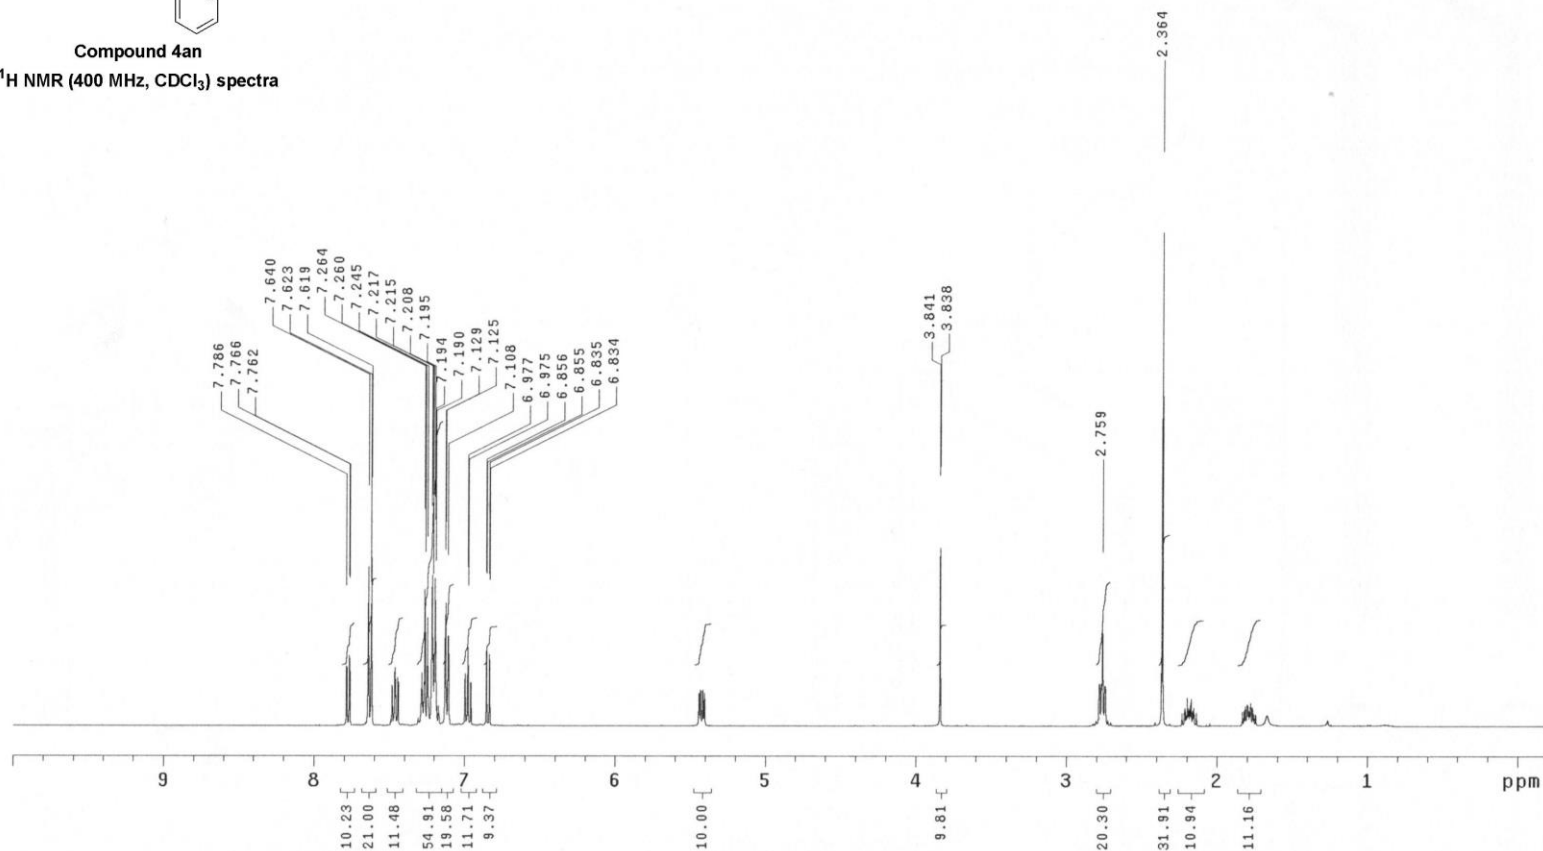



# Compound 4an ( $^{13}\text{C}$ -NMR spectral data)

HAK1A40

Pulse Sequence: s2pu1  
UNITYplus-400 "unity400"  
Date: Feb 23 2018  
Solvent:  $\text{CDCl}_3$   
Ambient temperature  
Total 960 repetitions

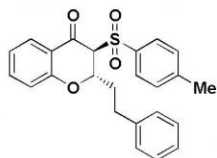

Compound 4an

$^{13}\text{C}$  NMR (100 MHz,  $\text{CDCl}_3$ ) spectra

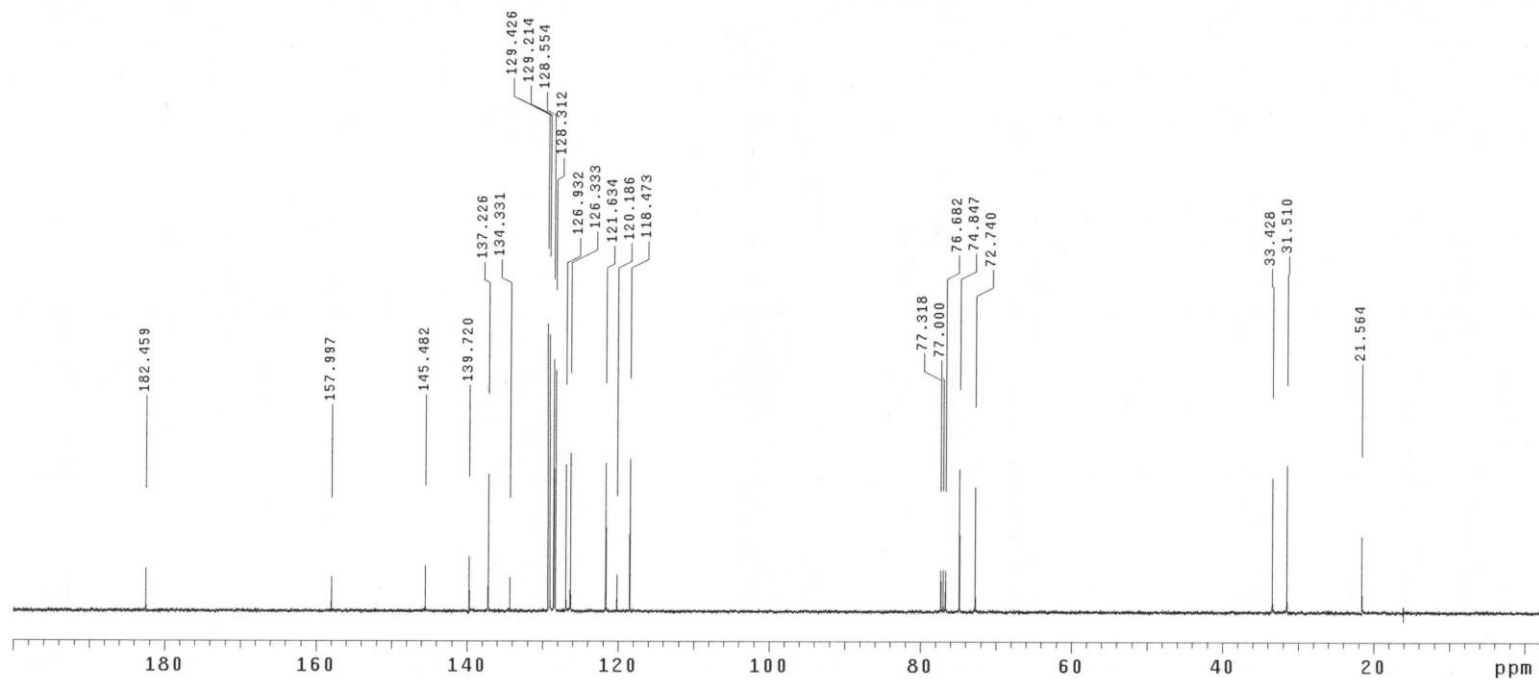

# Compound 4ao (<sup>1</sup>H-NMR spectral data)

HA7CDS

Pulse Sequence: s2pu1

UNITYplus-400 "unity400"

Date: Feb 26 2018

Solvent: CDCl<sub>3</sub>

Ambient temperature

Total 32 repetitions

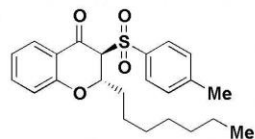

Compound 4ao

<sup>1</sup>H NMR (400 MHz, CDCl<sub>3</sub>) spectra

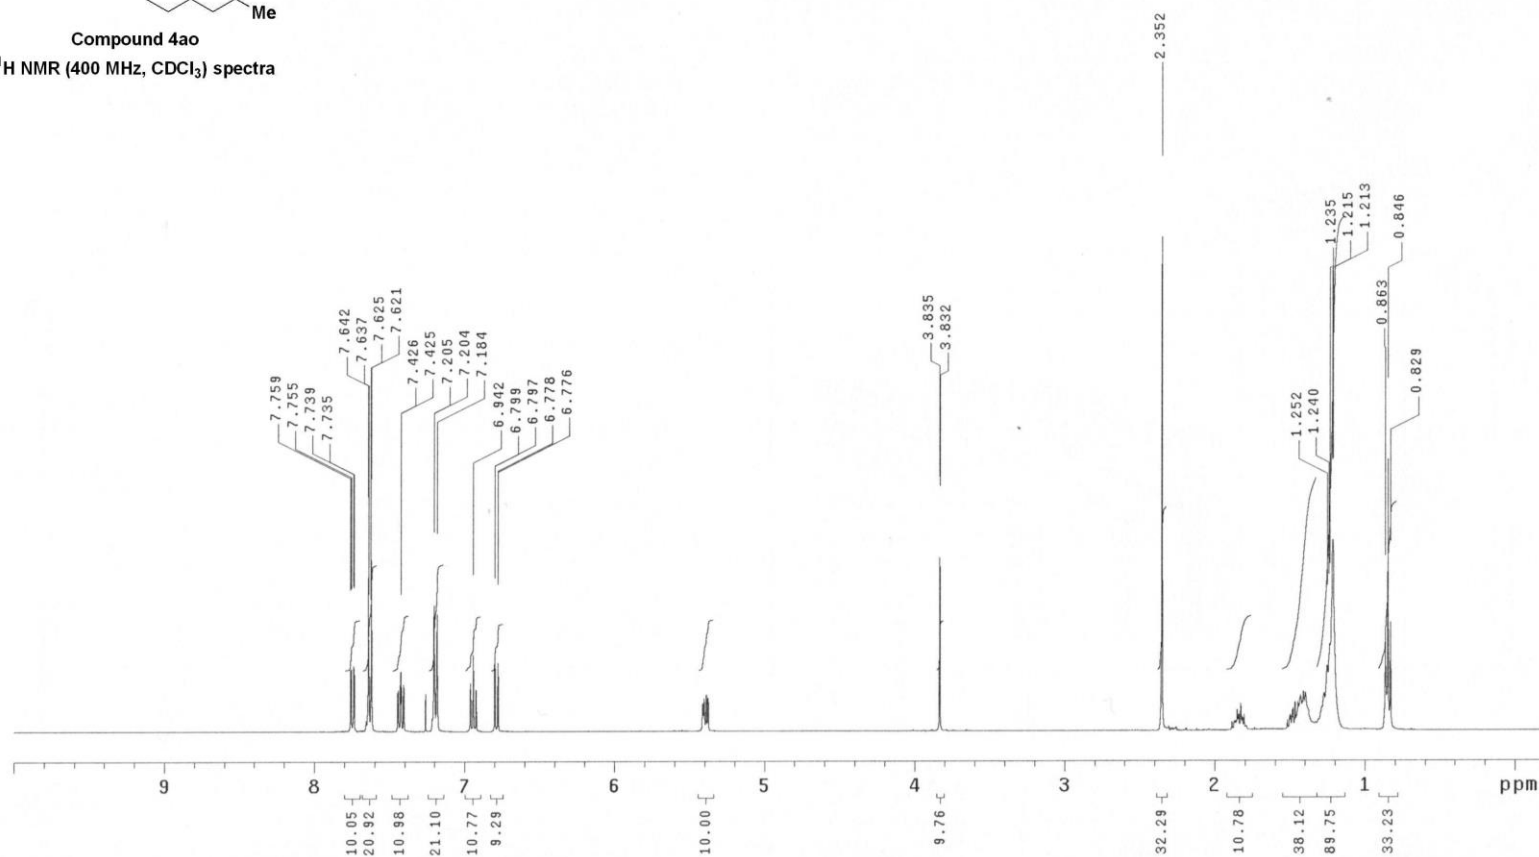

# Compound 4ao ( $^{13}\text{C}$ -NMR spectral data)

HA7CDS

Pulse Sequence: s2pu1

UNITYplus-400 "unity400"

Date: Feb 26 2018

Solvent:  $\text{CDCl}_3$

Ambient temperature

Total 912 repetitions

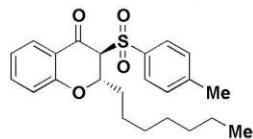

Compound 4ao

$^{13}\text{C}$  NMR (100 MHz,  $\text{CDCl}_3$ ) spectra

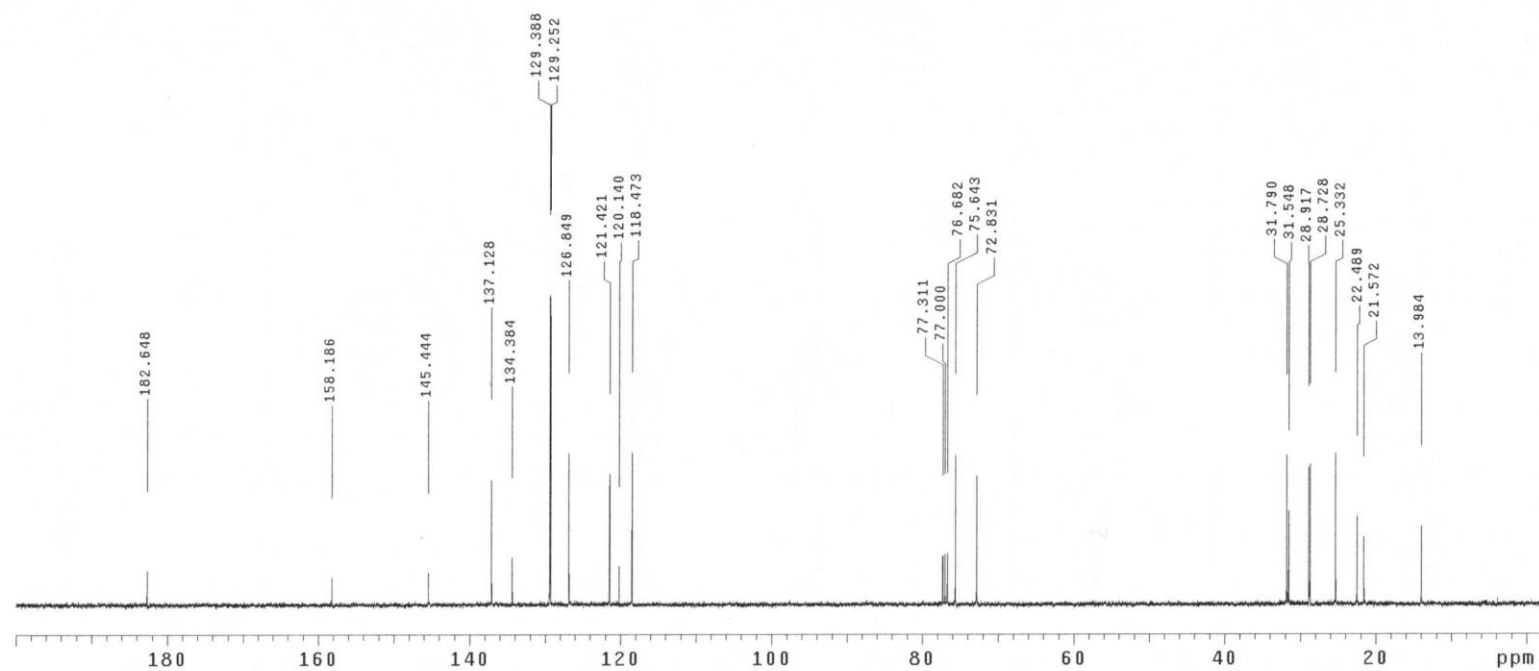

## X-ray crystal data of compound 4a (CCDC 1811124)

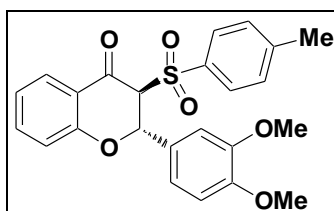

**Sample preparation :** A solution of compound **4a** (30 mg) in CH<sub>2</sub>Cl<sub>2</sub> (10 mL) was placed in a tube (10 mL). EtOAc (2 mL) was added slowly to the vial with a dropper. The vial was closed with little cotton and kept at room temperature for 2 days. Then, colorless prisms were observed.

**Crystal measurement :** X-ray crystal structures were determined with a Bruker Enraf-Nonius single-crystal diffractometer (CAD4, Kappa CCD). Thermal ellipsoids are drawn at 50% probability level.

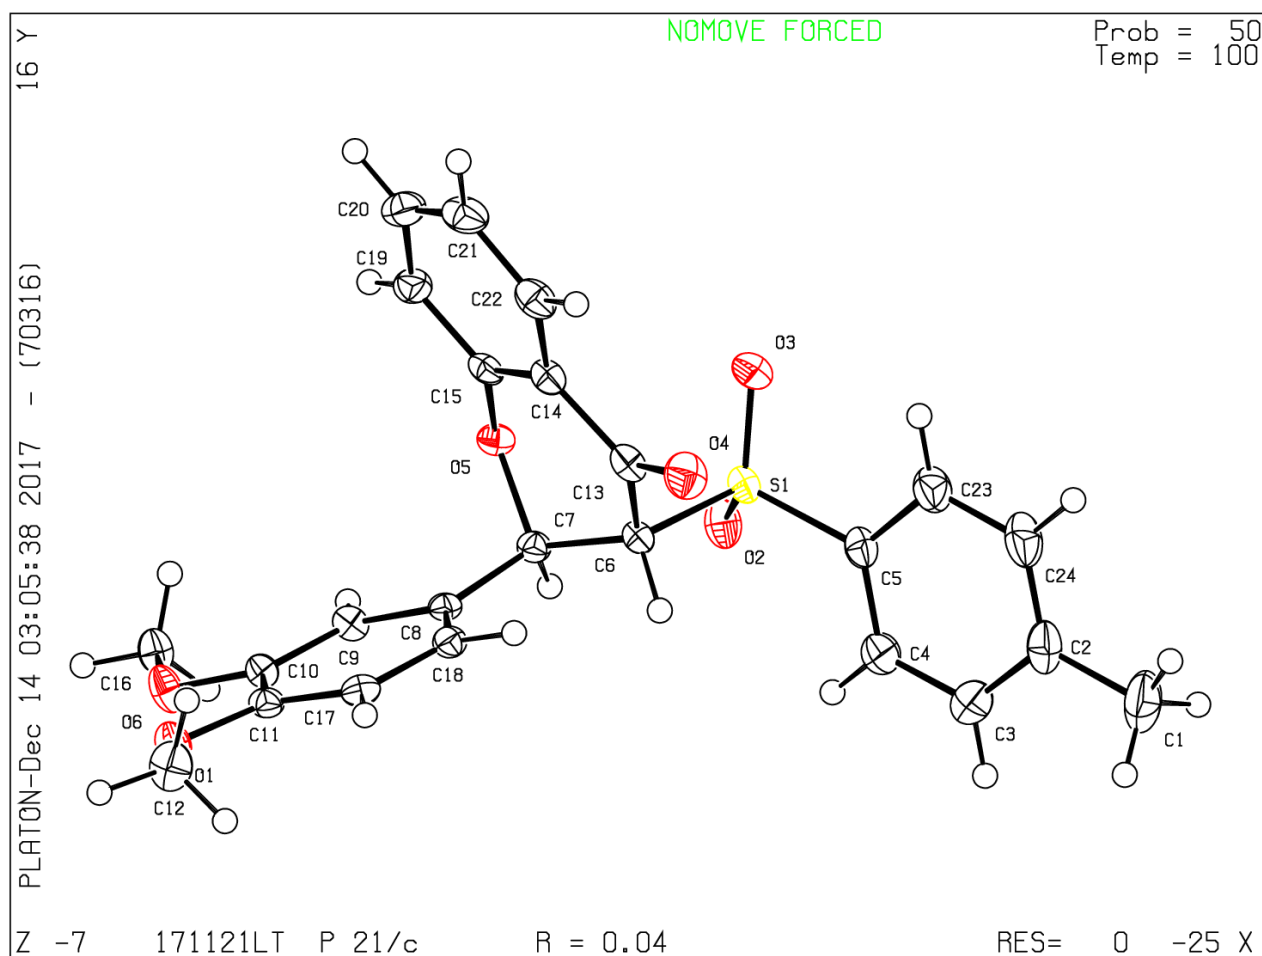

|                                   |                                                                                                           |
|-----------------------------------|-----------------------------------------------------------------------------------------------------------|
| Empirical formula                 | C <sub>24</sub> H <sub>22</sub> O <sub>6</sub> S                                                          |
| Formula weight                    | 438.47                                                                                                    |
| Temperature                       | 100(2) K                                                                                                  |
| Wavelength                        | 0.71073 Å                                                                                                 |
| Crystal system                    | Monoclinic                                                                                                |
| Space group                       | P 2 <sub>1</sub> /c                                                                                       |
| Unit cell dimensions              | a = 21.002(3) Å      α = 90°.<br>b = 11.9195(15) Å      β = 97.290(5)°.<br>c = 8.3067(11) Å      γ = 90°. |
| Volume                            | 2062.6(5) Å <sup>3</sup>                                                                                  |
| Z                                 | 4                                                                                                         |
| Density (calculated)              | 1.412 Mg/m <sup>3</sup>                                                                                   |
| Absorption coefficient            | 0.197 mm <sup>-1</sup>                                                                                    |
| F(000)                            | 920                                                                                                       |
| Crystal size                      | 0.18 x 0.18 x 0.06 mm <sup>3</sup>                                                                        |
| Theta range for data collection   | 0.977 to 26.475°.                                                                                         |
| Index ranges                      | -23 ≤ h ≤ 26, -14 ≤ k ≤ 14, -9 ≤ l ≤ 10                                                                   |
| Reflections collected             | 16553                                                                                                     |
| Independent reflections           | 4236 [R(int) = 0.0349]                                                                                    |
| Completeness to theta = 25.242°   | 100.0 %                                                                                                   |
| Absorption correction             | Semi-empirical from equivalents                                                                           |
| Max. and min. transmission        | 0.9485 and 0.8933                                                                                         |
| Refinement method                 | Full-matrix least-squares on F <sup>2</sup>                                                               |
| Data / restraints / parameters    | 4236 / 0 / 283                                                                                            |
| Goodness-of-fit on F <sup>2</sup> | 1.053                                                                                                     |
| Final R indices [I > 2σ(I)]       | R <sub>1</sub> = 0.0383, wR <sub>2</sub> = 0.0960                                                         |
| R indices (all data)              | R <sub>1</sub> = 0.0488, wR <sub>2</sub> = 0.1084                                                         |
| Extinction coefficient            | n/a                                                                                                       |
| Largest diff. peak and hole       | 0.291 and -0.358 e.Å <sup>-3</sup>                                                                        |

## X-ray crystal data of compound 4e (CCDC 1811125)

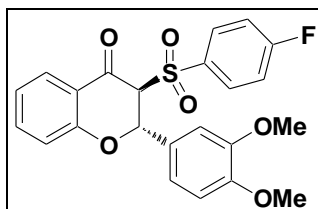

**Sample preparation :** A solution of compound **4e** (30 mg) in CH<sub>2</sub>Cl<sub>2</sub> (10 mL) was placed in a tube (10 mL). EtOAc (2 mL) was added slowly to the vial with a dropper. The vial was closed with little cotton and kept at room temperature for 2 days. Then, colorless prisms were observed.

**Crystal measurement :** X-ray crystal structures were determined with a Bruker Enraf-Nonius single-crystal diffractometer (CAD4, Kappa CCD). Thermal ellipsoids are drawn at 50% probability level.

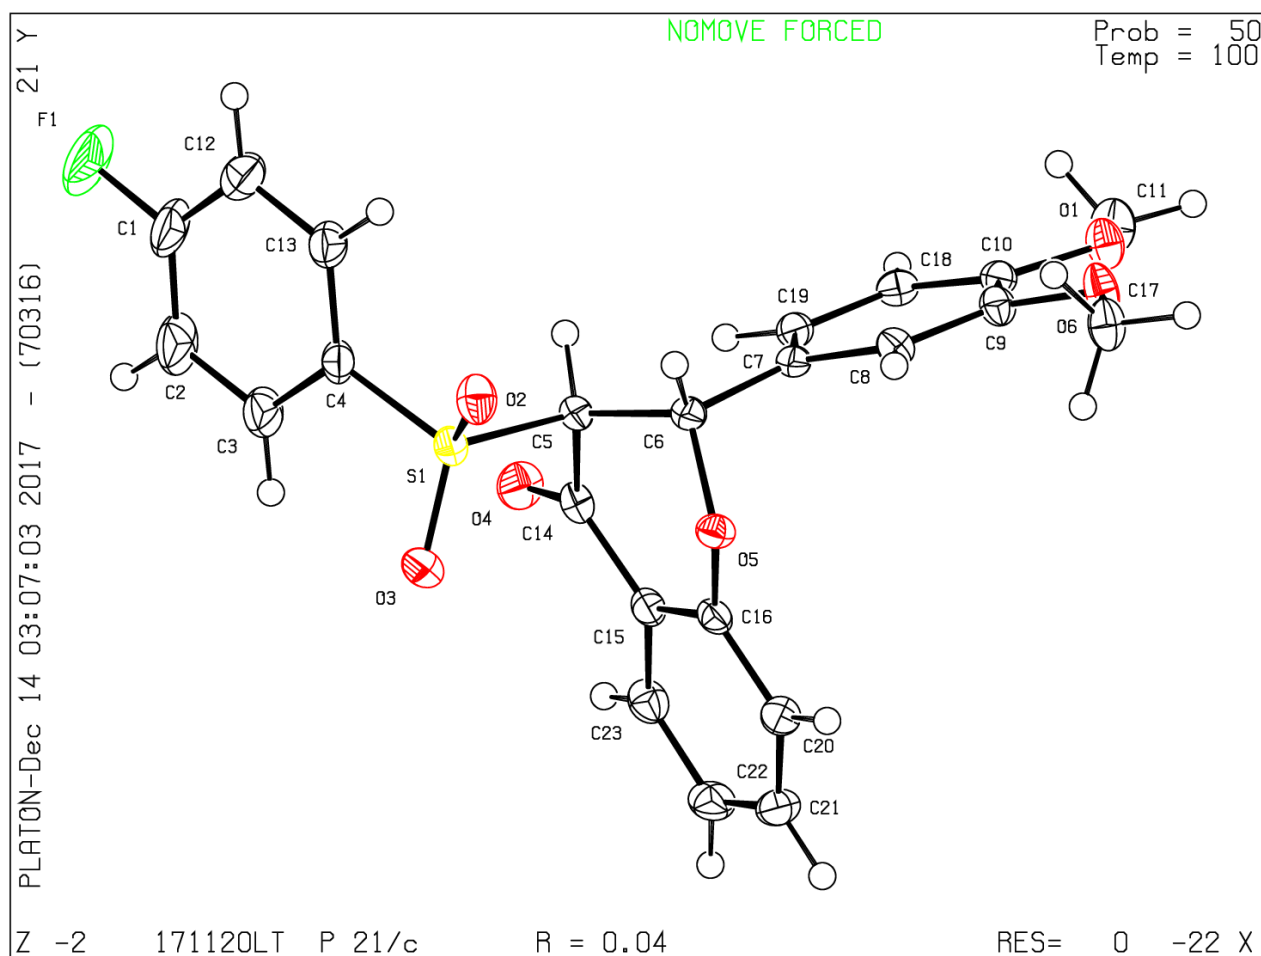

|                                   |                                             |
|-----------------------------------|---------------------------------------------|
| Empirical formula                 | C23 H19 F O6 S                              |
| Formula weight                    | 442.44                                      |
| Temperature                       | 100(2) K                                    |
| Wavelength                        | 0.71073 Å                                   |
| Crystal system                    | Monoclinic                                  |
| Space group                       | P 21/c                                      |
| Unit cell dimensions              | a = 20.5754(16) Å $\alpha = 90^\circ$ .     |
| b = 11.9457(8) Å                  | $\beta = 93.216(4)^\circ$ .                 |
| c = 8.2774(6) Å                   | $\gamma = 90^\circ$ .                       |
| Volume                            | 2031.3(3) Å <sup>3</sup>                    |
| Z                                 | 4                                           |
| Density (calculated)              | 1.447 Mg/m <sup>3</sup>                     |
| Absorption coefficient            | 0.208 mm <sup>-1</sup>                      |
| F(000)                            | 920                                         |
| Crystal size                      | 0.15 x 0.13 x 0.10 mm <sup>3</sup>          |
| Theta range for data collection   | 0.991 to 26.478°.                           |
| Index ranges                      | -25 ≤ h ≤ 25, -14 ≤ k ≤ 14, -10 ≤ l ≤ 10    |
| Reflections collected             | 16024                                       |
| Independent reflections           | 4167 [R(int) = 0.0468]                      |
| Completeness to theta = 25.242°   | 100.0 %                                     |
| Absorption correction             | Semi-empirical from equivalents             |
| Max. and min. transmission        | 0.9485 and 0.7484                           |
| Refinement method                 | Full-matrix least-squares on F <sup>2</sup> |
| Data / restraints / parameters    | 4167 / 0 / 282                              |
| Goodness-of-fit on F <sup>2</sup> | 1.056                                       |
| Final R indices [I > 2σ(I)]       | R1 = 0.0380, wR2 = 0.0921                   |
| R indices (all data)              | R1 = 0.0489, wR2 = 0.0997                   |
| Extinction coefficient            | n/a                                         |
| Largest diff. peak and hole       | 0.336 and -0.384 e.Å <sup>-3</sup>          |

## X-ray crystal data of compound 4ab (CCDC 1811128)

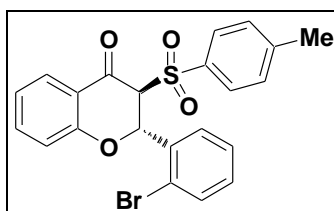

**Sample preparation** : A solution of compound **4ab** (30 mg) in CH<sub>2</sub>Cl<sub>2</sub> (10 mL) was placed in a tube (10 mL). EtOAc (2 mL) was added slowly to the vial with a dropper. The vial was closed with little cotton and kept at room temperature for 2 days. Then, colorless prisms were observed.

**Crystal measurement** : X-ray crystal structures were determined with a Bruker Enraf-Nonius single-crystal diffractometer (CAD4, Kappa CCD). Thermal ellipsoids are drawn at 50% probability level.

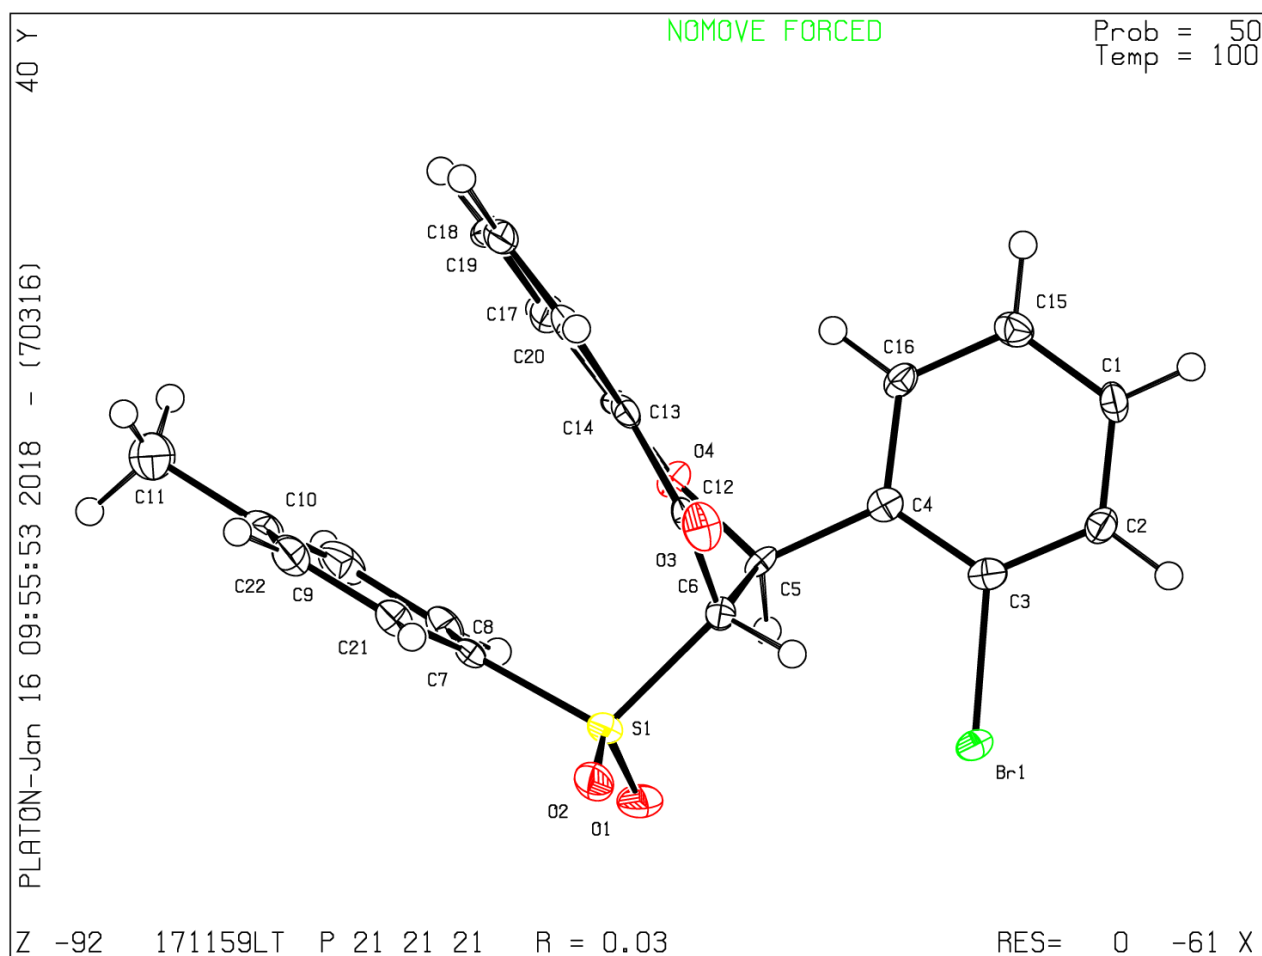



|                                   |                                                                                                                           |
|-----------------------------------|---------------------------------------------------------------------------------------------------------------------------|
| Empirical formula                 | C22 H17 Br O4 S                                                                                                           |
| Formula weight                    | 457.32                                                                                                                    |
| Temperature                       | 100(2) K                                                                                                                  |
| Wavelength                        | 0.71073 Å                                                                                                                 |
| Crystal system                    | Orthorhombic                                                                                                              |
| Space group                       | P 21 21 21                                                                                                                |
| Unit cell dimensions              | a = 8.6975(7) Å $\alpha = 90^\circ$ .<br>b = 11.1079(9) Å $\beta = 90^\circ$ .<br>c = 19.6779(17) Å $\gamma = 90^\circ$ . |
| Volume                            | 1901.1(3) Å <sup>3</sup>                                                                                                  |
| Z                                 | 4                                                                                                                         |
| Density (calculated)              | 1.598 Mg/m <sup>3</sup>                                                                                                   |
| Absorption coefficient            | 2.299 mm <sup>-1</sup>                                                                                                    |
| F(000)                            | 928                                                                                                                       |
| Crystal size                      | 0.25 x 0.25 x 0.12 mm <sup>3</sup>                                                                                        |
| Theta range for data collection   | 2.070 to 26.508°.                                                                                                         |
| Index ranges                      | -9<=h<=10, -13<=k<=13, -24<=l<=24                                                                                         |
| Reflections collected             | 15695                                                                                                                     |
| Independent reflections           | 3914 [R(int) = 0.0483]                                                                                                    |
| Completeness to theta = 25.242°   | 99.9 %                                                                                                                    |
| Absorption correction             | Semi-empirical from equivalents                                                                                           |
| Max. and min. transmission        | 0.9485 and 0.8003                                                                                                         |
| Refinement method                 | Full-matrix least-squares on F <sup>2</sup>                                                                               |
| Data / restraints / parameters    | 3914 / 0 / 254                                                                                                            |
| Goodness-of-fit on F <sup>2</sup> | 1.012                                                                                                                     |
| Final R indices [I>2sigma(I)]     | R1 = 0.0283, wR2 = 0.0543                                                                                                 |
| R indices (all data)              | R1 = 0.0342, wR2 = 0.0561                                                                                                 |
| Absolute structure parameter      | 0.011(6)                                                                                                                  |
| Extinction coefficient            | n/a                                                                                                                       |
| Largest diff. peak and hole       | 0.445 and -0.277 e.Å <sup>-3</sup>                                                                                        |

## X-ray crystal data of compound 4af (CCDC 1811129)

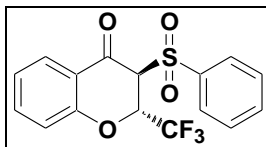

**Sample preparation :** A solution of compound **4af** (30 mg) in CH<sub>2</sub>Cl<sub>2</sub> (10 mL) was placed in a tube (10 mL). EtOAc (2 mL) was added slowly to the vial with a dropper. The vial was closed with little cotton and kept at room temperature for 2 days. Then, colorless prisms were observed.

**Crystal measurement :** X-ray crystal structures were determined with a Bruker Enraf-Nonius single-crystal diffractometer (CAD4, Kappa CCD). Thermal ellipsoids are drawn at 50% probability level.

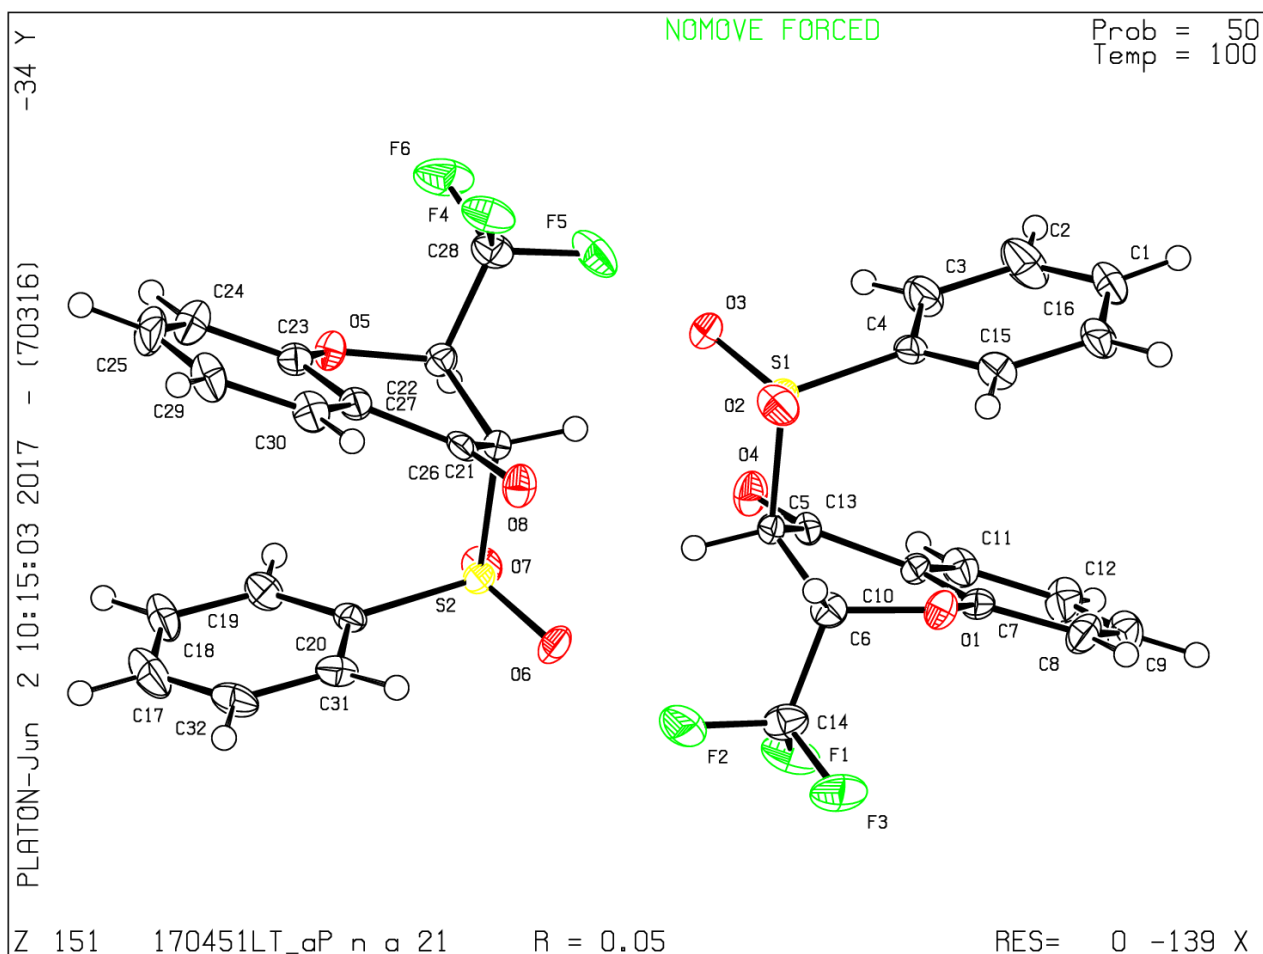

|                                   |                                                                                                                           |
|-----------------------------------|---------------------------------------------------------------------------------------------------------------------------|
| Empirical formula                 | C32 H22 F6 O8 S2                                                                                                          |
| Formula weight                    | 712.61                                                                                                                    |
| Temperature                       | 100(2) K                                                                                                                  |
| Wavelength                        | 0.71073 Å                                                                                                                 |
| Crystal system                    | Orthorhombic                                                                                                              |
| Space group                       | P n a 21                                                                                                                  |
| Unit cell dimensions              | a = 24.1977(12) Å $\alpha = 90^\circ$ .<br>b = 9.9696(5) Å $\beta = 90^\circ$ .<br>c = 12.6028(6) Å $\gamma = 90^\circ$ . |
| Volume                            | 3040.3(3) Å <sup>3</sup>                                                                                                  |
| Z                                 | 4                                                                                                                         |
| Density (calculated)              | 1.557 Mg/m <sup>3</sup>                                                                                                   |
| Absorption coefficient            | 0.265 mm <sup>-1</sup>                                                                                                    |
| F(000)                            | 1456                                                                                                                      |
| Crystal size                      | 0.22 x 0.20 x 0.16 mm <sup>3</sup>                                                                                        |
| Theta range for data collection   | 1.683 to 26.419°.                                                                                                         |
| Index ranges                      | -26<= <i>h</i> <=30, -12<= <i>k</i> <=11, -15<= <i>l</i> <=13                                                             |
| Reflections collected             | 24496                                                                                                                     |
| Independent reflections           | 6075 [R(int) = 0.0460]                                                                                                    |
| Completeness to theta = 25.242°   | 100.0 %                                                                                                                   |
| Absorption correction             | Semi-empirical from equivalents                                                                                           |
| Max. and min. transmission        | 0.9485 and 0.7454                                                                                                         |
| Refinement method                 | Full-matrix least-squares on F <sup>2</sup>                                                                               |
| Data / restraints / parameters    | 6075 / 1 / 433                                                                                                            |
| Goodness-of-fit on F <sup>2</sup> | 1.039                                                                                                                     |
| Final R indices [I>2sigma(I)]     | R1 = 0.0543, wR2 = 0.1316                                                                                                 |
| R indices (all data)              | R1 = 0.0574, wR2 = 0.1359                                                                                                 |
| Absolute structure parameter      | 0.04(4)                                                                                                                   |
| Extinction coefficient            | n/a                                                                                                                       |
| Largest diff. peak and hole       | 1.821 and -0.385 e.Å <sup>-3</sup>                                                                                        |

## X-ray crystal data of compound 4aj (CCDC 1811130)

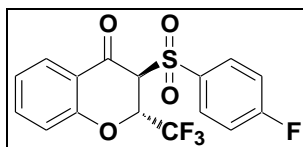

**Sample preparation :** A solution of compound **4aj** (30 mg) in CH<sub>2</sub>Cl<sub>2</sub> (10 mL) was placed in a tube (10 mL). EtOAc (2 mL) was added slowly to the vial with a dropper. The vial was closed with little cotton and kept at room temperature for 2 days. Then, colorless prisms were observed.

**Crystal measurement :** X-ray crystal structures were determined with a Bruker Enraf-Nonius single-crystal diffractometer (CAD4, Kappa CCD). Thermal ellipsoids are drawn at 50% probability level.

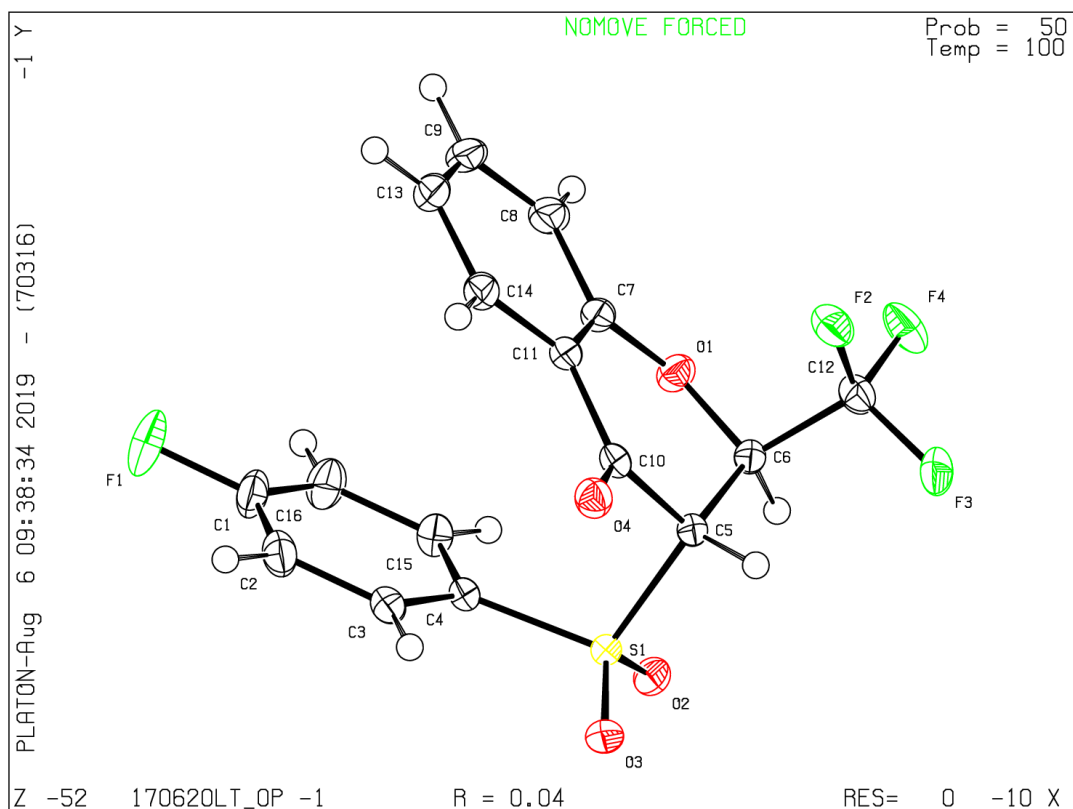

|                                   |                                                                                                                                                   |
|-----------------------------------|---------------------------------------------------------------------------------------------------------------------------------------------------|
| Empirical formula                 | C16 H10 F4 O4 S                                                                                                                                   |
| Formula weight                    | 374.30                                                                                                                                            |
| Temperature                       | 100(2) K                                                                                                                                          |
| Wavelength                        | 0.71073 Å                                                                                                                                         |
| Crystal system                    | Triclinic                                                                                                                                         |
| Space group                       | P-1                                                                                                                                               |
| Unit cell dimensions              | a = 8.3801(12) Å $\alpha = 97.183(6)^\circ$ .<br>b = 9.4312(12) Å $\beta = 105.437(6)^\circ$ .<br>c = 11.0839(15) Å $\gamma = 113.837(6)^\circ$ . |
| Volume                            | 745.01(18) Å <sup>3</sup>                                                                                                                         |
| Z                                 | 2                                                                                                                                                 |
| Density (calculated)              | 1.669 Mg/m <sup>3</sup>                                                                                                                           |
| Absorption coefficient            | 0.284 mm <sup>-1</sup>                                                                                                                            |
| F(000)                            | 380                                                                                                                                               |
| Crystal size                      | 0.20 x 0.15 x 0.15 mm <sup>3</sup>                                                                                                                |
| Theta range for data collection   | 1.976 to 26.815°.                                                                                                                                 |
| Index ranges                      | -10 ≤ h ≤ 8, -11 ≤ k ≤ 11, -13 ≤ l ≤ 14                                                                                                           |
| Reflections collected             | 10875                                                                                                                                             |
| Independent reflections           | 3085 [R(int) = 0.0402]                                                                                                                            |
| Completeness to theta = 25.242°   | 99.2 %                                                                                                                                            |
| Absorption correction             | Semi-empirical from equivalents                                                                                                                   |
| Max. and min. transmission        | 0.9485 and 0.8163                                                                                                                                 |
| Refinement method                 | Full-matrix least-squares on F <sup>2</sup>                                                                                                       |
| Data / restraints / parameters    | 3085 / 0 / 226                                                                                                                                    |
| Goodness-of-fit on F <sup>2</sup> | 1.107                                                                                                                                             |
| Final R indices [I > 2sigma(I)]   | R1 = 0.0439, wR2 = 0.1125                                                                                                                         |
| R indices (all data)              | R1 = 0.0489, wR2 = 0.1165                                                                                                                         |
| Extinction coefficient            | n/a                                                                                                                                               |
| Largest diff. peak and hole       | 0.434 and -0.611 e.Å <sup>-3</sup>                                                                                                                |
